1        Timeline of changes in spike conformational dynamics in emergent  
2        SARS-CoV-2 variants reveal progressive stabilization of trimer stalk and  
3        enhanced NTD dynamics  
4

5  
6        **Authors**

7  
8        Sean M. Braet,<sup>1†</sup> Theresa S. C. Buckley,<sup>1†</sup> Varun Venkatakrishnan,<sup>1†</sup> Kim-Marie A. Dam,<sup>2</sup>  
9        Pamela J. Bjorkman,<sup>2</sup> Ganesh S. Anand<sup>1\*</sup>

10  
11        **Affiliations**

12        <sup>1</sup>Department of Chemistry, The Pennsylvania State University, University Park, PA.

13        <sup>2</sup>Division of Biology and Biological Engineering, California Institute of Technology, Pasadena,  
14        CA.

15  
16  
17        †Contributed equally to this work.

18        \*Corresponding author – [gsa5089@psu.edu](mailto:gsa5089@psu.edu)

19  
20  
21        **Abstract**

22        SARS-CoV-2 emergent variants are characterized by increased transmissibility and each show  
23        multiple mutations predominantly localized to the spike (S) protein. Here, amide  
24        hydrogen/deuterium exchange mass spectrometry has been applied to track correlative changes in  
25        S dynamics from multiple SARS-CoV-2 variants. Our results highlight large differences across  
26        variants at two loci with impacts on S dynamics and stability. A significant enhancement in  
27        stabilization first occurred with the emergence of D614G S followed by smaller, progressive  
28        stabilization in Omicron BA.1 S traced through Alpha S and Delta S variants. Stabilization  
29        preceded progressive enhancement in dynamics in the N-terminal domain, wherein Omicron BA.1  
30        S showed the largest magnitude increases relative to other preceding variants. Changes in  
31        stabilization and dynamics resulting from specific S mutations detail the evolutionary trajectory of

32 S protein in emerging variants. These carry major implications for SARS-CoV-2 viral fitness and  
33 offer new insights into variant-specific therapeutic development.

34  
35 **Introduction**

36 SARS-CoV-2 was first identified in late 2019 and is the causative agent of the ongoing  
37 coronavirus pandemic (Chang et al., 2020). Extensive efforts have sparked the development of a  
38 number of vaccines and therapeutics to mitigate the effects of infection. However, the emergence  
39 of numerous variants of concern have created an additional challenge to treatment and prevention  
40 efforts. The periodic emergence of new variants of concern beginning with Alpha, and later  
41 including Delta and most recently Omicron BA.1, have contributed to surges in cases worldwide  
42 (Wassenaar et al., 2022).

43 SARS-CoV-2 is a member of the family *Coronaviridae* along with other human pathogens  
44 including SARS-CoV and MERS (Corman et al., 2018). The SARS-CoV-2 virion is enveloped  
45 and encapsulates a 30 kb +ssRNA genome that encodes envelope (E) protein, membrane (M)  
46 protein, spike (S) protein, as well as 16 non-structural proteins and 9 accessory proteins (Ke et al.,  
47 2020). S, a critical viral protein for SARS-CoV-2 entry that is targeted by neutralizing antibodies,  
48 plays a multifunctional role in the infection process and is therefore a target for vaccine  
49 development (Martinez-Flores et al., 2021). S is a glycosylated homotrimer with each monomer  
50 consisting of S1 and S2 subunits (Fig. 1A). The S1 domain comprises an N-terminal domain  
51 (NTD), a receptor-binding domain (RBD) and two subdomains SD1 and 2, with the RBD  
52 mediating the interaction interface with the human ACE2 receptor (Lan et al., 2020). The S2  
53 domain includes the S1/S2 and S2 proteolytic cleavage sites as well as a fusion peptide. During  
54 the viral entry process, the S protein is processed by furin protease at the S1/S2 cleavage site either  
55 prior to or after S binding to ACE2 receptor. This enables secondary cleavage by a separate

56 protease (commonly transmembrane serine protease 2 (TMPRSS2) or cathepsin) at the S2 site  
57 (Peacock et al., 2021; Shang et al., 2020; Vankadari, 2020), which leads to dissociation of S1 and  
58 release of the S2 subunit to drive membrane fusion and cellular entry.

59 S protein plays three critical roles in facilitating host cell entry: S must bind ACE2, be  
60 proteolytically processed, and promote membrane fusion. Domain-specific investigation of S and  
61 its variants have provided insights into effects of mutations on functionalities in isolation.  
62 However, there is a need to address the composite impact of individual variants on S  
63 conformational ensembles in solution (Raghuvamsi et al., 2021). Altered conformations in mutant  
64 S proteins from variants would impact interactions of S with ACE2 and downstream functions.

65 Due to its key roles in viral host recognition and entry, it is unsurprising that S is a hotspot  
66 for mutations in emerging variants. A defining feature of emerging variants is each of these became  
67 more dominant over the prevailing strains, which has been attributed in part to progressively  
68 increased viral fitness (Y. Liu et al., 2022; Plante et al., 2021; Ulrich et al., 2022). Consequently,  
69 S D614G showed greater fitness than wild-type S (Plante et al., 2021), the Alpha variant S showed  
70 greater fitness than D614G S (Ulrich et al., 2022), and the Delta variant S showed greater fitness  
71 than Alpha S (Y. Liu et al., 2022), which likely contributed to surges in human infections. Among  
72 the first set of mutations that were detected in S during the early phase of the pandemic, D614G  
73 emerged as a dominant variant in 2020 (Chang et al., 2020; Pandey et al., 2021). One of the striking  
74 effects observed in a comparison of WT and D614G S proteins revealed a ~ 50X enhancement in  
75 proteolytic processing by furin (Gobeil et al., 2021).

76 The Alpha variant subsequently emerged in September 2020, and in addition to D614G,  
77 the S carried other mutations in NTD (del 69-70, del 144), RBD (N501Y, A570D), the furin-

78 binding site (P681H) and the S2 subunit (T716I, S982A, and D1118H) (Xia et al., 2021) (Fig. 1B).  
79 SARS-CoV-2 infections by the Alpha variant were replaced by a more dominant Delta variant,  
80 first identified in October 2020. The Delta variant S included mutations in the NTD (T19R,  
81 G142D, del 156-157, R158G), RBD (L452R, T478K), furin cleavage site (P681R), and the S2  
82 subunit (D950N) (Tian et al., 2021). A more recent surge in infection has been due to the Omicron  
83 variant (BA.1) first identified in November 2021 and was the most highly mutated variant  
84 compared to wildtype (Fig. 1B) (L. Liu et al., 2022). Notably, the D614G mutation has been  
85 conserved across all major variants of concern (Wassenaar et al., 2022). Additionally, the P681R  
86 mutation found in the Delta S and Omicron BA.1 S has been found to increase pathogenicity and  
87 proteolytic processing (Y. Liu et al., 2022; Saito et al., 2021), and RBD mutations in variants of  
88 concern have been found to increase affinity for the ACE2 receptor (Han et al., 2022; Ozono et  
89 al., 2021).

90

91

92

93

94

95

96

97



98 **Fig.1**

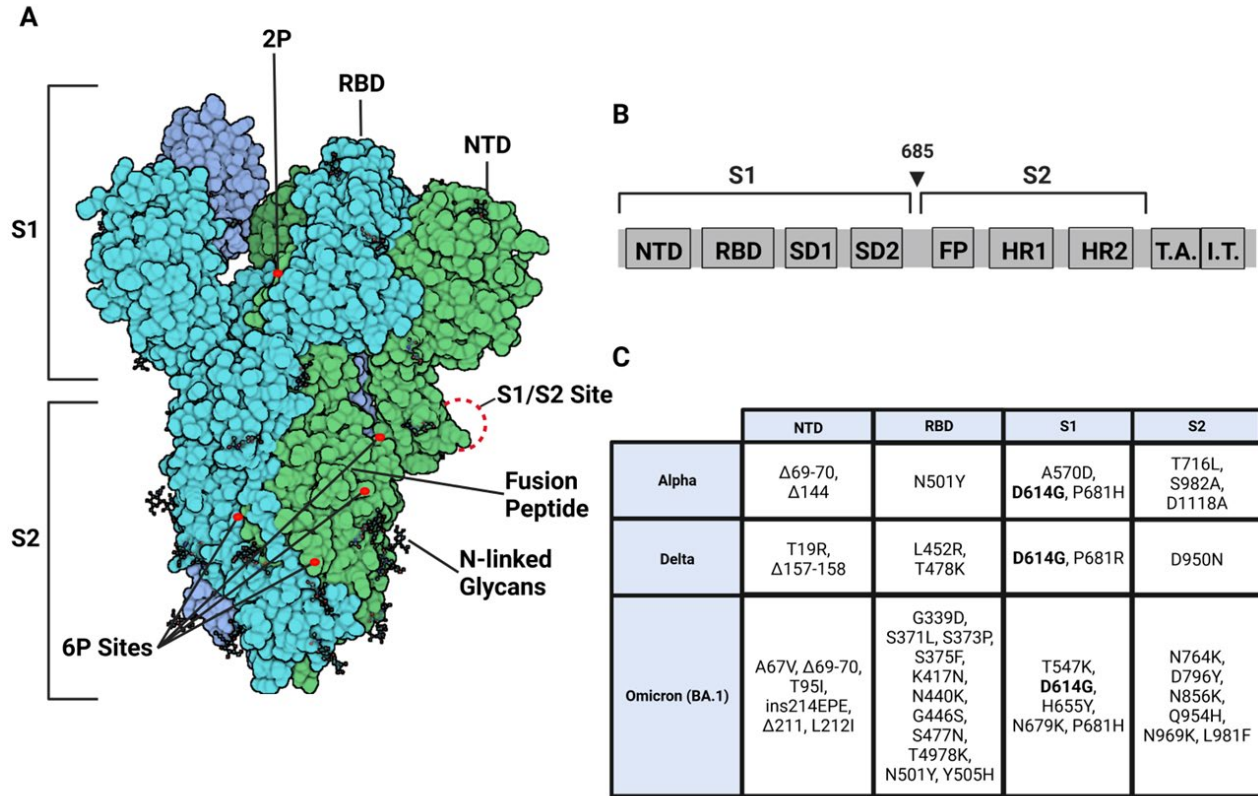

99  
 100 **Fig. 1. S trimer modifications and variant mutations.** (A) S trimer (PDB:6VSB) (protomers in dark blue, teal, and  
 101 green) with RBD, NTD, S1/S2 site, fusion peptide, 2P substitutions (985-986), additional 6P substitutions (817, 892,  
 102 899, 942), and glycans. (Image created in Biorender.com) (B) Sequence organization for SARS-CoV-2 S protein  
 103 (NTD = N-terminal domain, RBD – receptor binding domain, SD1 = subdomain 1, SD2 = subdomain 2, FP = fusion  
 104 peptide, HR1 = heptad repeat 1, HR2 = heptad repeat 2, T.A. = transmembrane domain, I.T. = intracellular domain.  
 105 The brackets define the recombinant soluble S protein used in this study. Furin cleavage site (685) is indicated by  
 106 arrow (C) Mutations specific to Alpha, Delta, and Omicron BA.1 S variants. D614G is highlighted in bold.

107 A defining feature of the emergent variants is the apparent progressive increase in  
 108 transmissibility between humans attributable to corresponding increased viral fitness *in vitro* (Y.  
 109 Liu et al., 2022; Plante et al., 2021; Ulrich et al., 2022). The basis for increased viral fitness in  
 110 emerging variants remains poorly understood. Snapshots from single-particle cryo-EM structures  
 111 of SARS-CoV-2 S trimers have provided structural insights at high resolution (Cai et al., 2020;  
 112 Duan et al., 2020; Walls et al., 2020; Zhang et al., 2021) but do not completely capture all of the  
 113 interconverting conformations in solution. Multiple conformations showing RBD in ‘up’ or  
 114 ‘down’ orientations have been observed by cryo-EM. In the trimer, these translate into closed- all

115 ‘down’ or one, two or all ‘up’ conformations (Barnes, Jette, et al., 2020). These interchanging  
116 conformations in solution highlight the ensemble behavior of S. Dynamics of the S ensemble are  
117 fundamental to assessing trimer stability and the role of conformational substates in receptor  
118 binding, proteolytic processing, and disease propagation. The ensemble properties have been  
119 shown to be critical for ACE2 recognition. The RBDs of S protein have been reported to bind the  
120 ACE2 receptor only in an ‘up’ conformation (Barnes, Jette, et al., 2020).

121 Amide hydrogen deuterium exchange mass spectrometry (HDXMS) is a useful method for  
122 probing dynamic breathing motions and conformational ensembles in viral systems (Costello et  
123 al., 2022; X.-X. Lim et al., 2017; X. X. Lim et al., 2017; Narang et al., 2021; Raghuvamsi et al.,  
124 2021). HDXMS uses D<sub>2</sub>O as a probe that labels backbone amides with deuterium dependent upon  
125 both solvent accessibility (Peacock et al., 2018) and H-bond propensities (Englander &  
126 Kallenbach, 1983). The labeling reaction can be quenched to probe time scales ranging from  
127 second to days with shorter timescales impacted primarily by changes in solvent accessibility and  
128 longer timescales assessing changes in H-bonding (Peacock et al., 2018). Pepsin proteolysis  
129 combined with mass spectrometry provides a readout of deuterium exchange at peptide resolution  
130 that can be mapped onto a structure (Hoofnagle et al., 2003). This captures dynamics (> seconds  
131 timescale) of the whole ensemble. Further it offers an ability to resolve more than one slow  
132 interchanging conformations (if present) by deconvolution of bimodal distributions of deuterium  
133 exchanged mass spectral envelopes (Hodge et al., 2020; Hoofnagle et al., 2003; Oganessian et al.,  
134 2018). Decreased deuterium exchange reflects protection from solvent and/or enhanced stability  
135 and correspondingly; increased exchange reports increased solvent accessibility and/or disorder.

136 Comparative HDXMS of recombinant wildtype, D614G, Alpha, Delta, and Omicron BA.1  
137 S variants has allowed us to track changes in intrinsic dynamics across conserved regions of S

138 through the progressively emerging variants of concern. Our results reveal that the timeline of  
139 emergence corresponds to an overall stabilizing effect on the S trimer, together with increased  
140 dynamics in the NTD and RBD. These loci in the S2 and S1 subunits encompass sites on S showing  
141 greatest differences in deuterium exchange in non-glycosylated peptides common across all  
142 variants. Peptides showing differential deuterium exchange identified in the trimeric interface  
143 referred to as the stalk region in the rest of the study, report inter-protomer interactions while  
144 changes in the NTD and RBD report intra-protomer interactions. The D614G point mutation  
145 conferred an initial increase in stalk stabilization. This together with increased NTD dynamics in  
146 newer variants, contributed to further enhancement of both effects. Timeline analysis reveals that  
147 stabilization and enhancement of NTD dynamics effects are independent, with Delta S achieving  
148 near maximal stabilization as measured by HDXMS in our experimental timescales. Variants  
149 showed varied NTD dynamics with Omicron showing the greatest magnitude increases in NTD  
150 dynamics compared to the predecessor variants and wild-type. It is yet to be seen if NTD dynamics  
151 can continue to show increases in successive variants of concern. These underscore the coordinated  
152 importance of stalk stability together with NTD flexibility upon overall S trimer dynamics, with  
153 major consequences for ACE2 recognition, binding, and proteolytic processing.

154

155

## 156 **Results**

### 157 **Equilibration at 37 °C (3 h incubation) shifts S ensemble toward prefusion conformation**

158 Recombinant soluble S protein constructs have made them more accessible for structural and  
159 biophysical research by obviating the need to culture SARS-CoV-2 viruses, which require  
160 extensive safety procedures and related infrastructure. Engineered S ectodomain constructs show  
161 increased expression yields aided by ablating furin-like protease cleavage site and enhancing

162 stability through proline substitutions (2P) (Amanat et al., 2021) and 6P (hexapro) (Hsieh et al.,  
163 2020). These engineered constructs also eliminated the need for detergent solubilization by  
164 excluding the transmembrane C-terminal segments that are embedded in the lipid bilayer in S  
165 protein assembled on intact SARS-CoV-2 particles (Barnes, West, et al., 2020).

166 We carried out our HDXMS analysis with a construct containing either 2P or 6P  
167 substitutions and with the four amino acid furin cleavage motif (RRAR) substituted with a single  
168 alanine (Amanat et al., 2021). These were expressed in HEK-293T cells (Barnes, West, et al.,  
169 2020). S trimers were purified by Ni-NTA and size exclusion chromatography (SEC) as described  
170 in methods. The trimer state was independently verified by cryo-EM analysis (Barnes, Jette, et al.,  
171 2020; Barnes, West, et al., 2020). S is multiply glycosylated with 22 potential N-linked  
172 glycosylation sites (Watanabe et al., 2020). We confirmed our purified trimeric S protein was  
173 multiply glycosylated and mapped N-linked glycosylation sites by bottom-up proteomics as  
174 described in methods. Of 22 potential N-linked glycosylation sites, we identified 20 sites in wild  
175 type S, 21 glycosylation sites in D614G and Delta variant S proteins, and 19 glycosylation sites in  
176 Omicron BA.1 S (Table S1). Wild-type and variant S proteins in subsequent sections denote either  
177 a 2P (Pallesen et al., 2017) or 6P (hexapro) (Hsieh et al., 2020) as described.

178 We carried out comparative HDXMS on 2P and 6P engineered wild-type S protein to probe  
179 differences in dynamics. 160 non-glycosylated pepsin fragment peptides provided S sequence  
180 coverage of 53.1% (Figure 2-figure supplement 1). HDXMS was measured at time points (Dex =  
181 1-10 min). A deuterium exchange difference map and peptide level significance testing (shown in  
182 Woods plots (Lau et al., 2021) of the two constructs) revealed no substantial differences ( $\Delta < 0.5$   
183 Da) (Figure 2-figure supplement 3-4), indicating both 2P and 6P constructs offered a common  
184 baseline for assessing differences across S variants.

185           The soluble S trimer constructs have been observed to show sensitivity to cold temperature  
186 treatment (Costello et al., 2022): Negative stain EM (nsEM) analysis following long-term storage  
187 at 4 °C revealed heterogeneous S conformations indicative of trimer instability, whereas incubation  
188 at 37 °C for 3h was found to recover a well-formed and more homogenous trimeric structure  
189 (Edwards et al., 2021). However, longer incubation times were not found to increase the proportion  
190 of S in the trimeric state. It is yet to be determined if this cold sensitivity is an inherent property of  
191 the intact S protein or is relevant only to the S trimer ectodomain constructs.

192           To test the effects of temperature optimization on the S trimer ectodomain, we compared  
193 HDXMS on wild-type S treated with and without a 3 h incubation at 37 °C after flash freezing and  
194 long-term storage at -80 °C. 170 non-glycosylated pepsin fragment peptides provided a primary  
195 sequence coverage of 53.6%, and HDXMS was measured at time points (Dex = 1-10 min) (Figure  
196 2-figure supplement 2). A deuterium exchange heat map (% RFU) of wt S shown in Fig. 2A shows  
197 higher relative exchange on the outer edges of the trimer compared to the intratrimer core (Fig.  
198 2A). Decreased exchange alone was observed across multiple regions of S and of high magnitude  
199 at the trimer interface (Fig. 2B and D). Decreases were most prominent for peptides in trimer stalk  
200 region of S (peptides 899-913, 988-998, 1013-1021) and other interprotomer contacts (peptides  
201 553-568 and 32-48), indicative of increased stability following a 3h incubation at 37 °C (Fig. 2C-  
202 E, Figure 2-figure supplement 5).

203

204

205

206

207 **Fig. 2.**

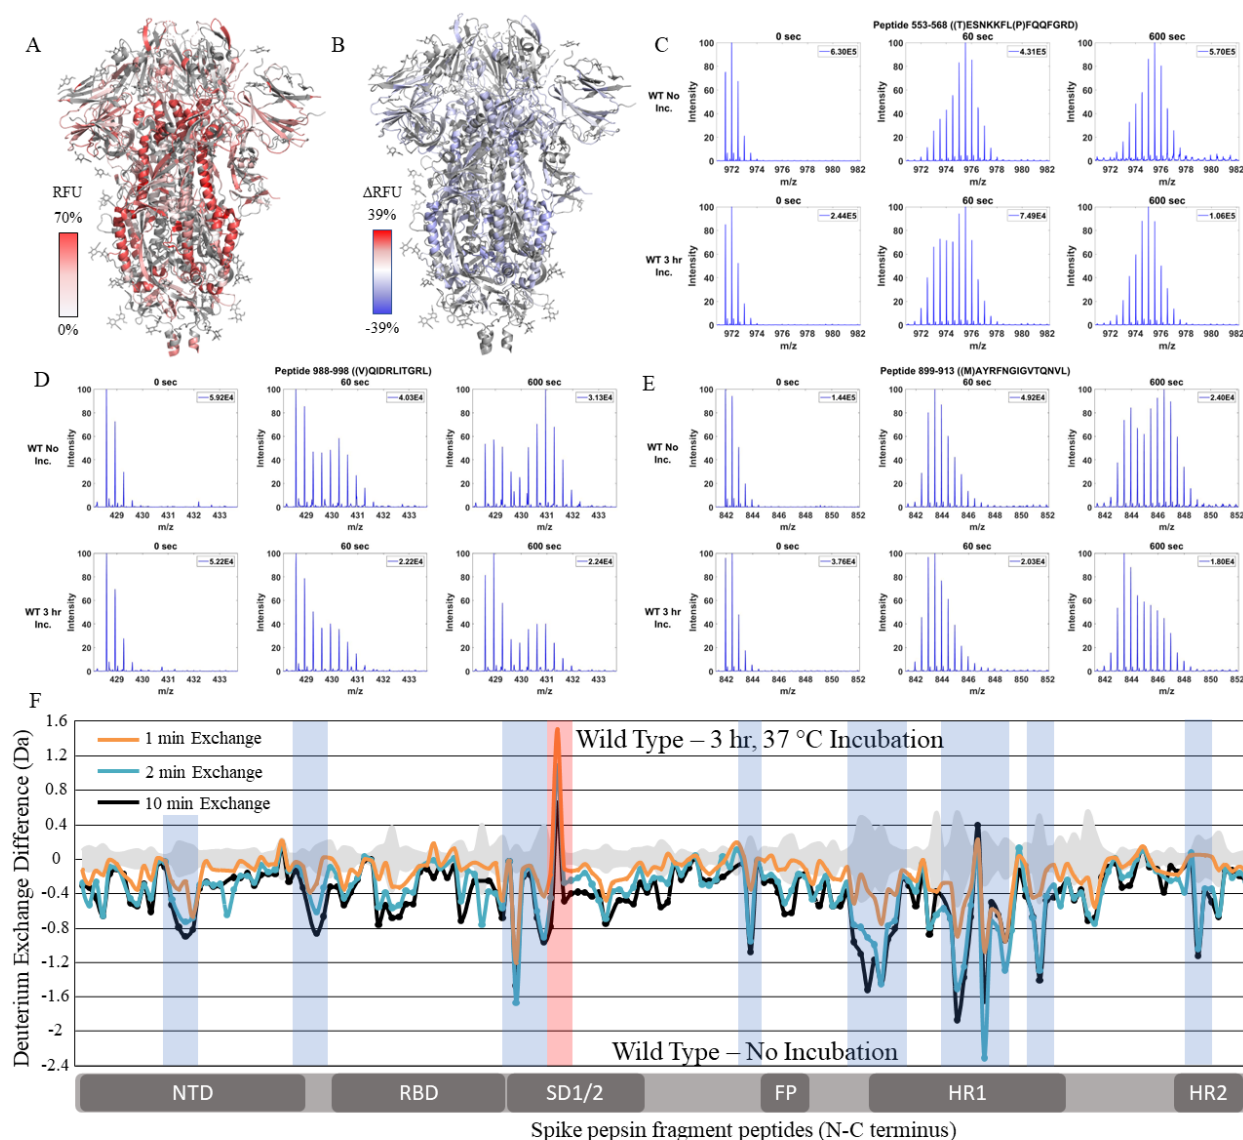

208

209 **Fig. 2. WT S trimer undergoes temperature dependent trimer-monomer transitions.** (A) Relative fractional  
 210 uptake ( $t = 10$  min) for unincubated wildtype S protein mapped onto an S trimer structure with three ‘down’ RBDs  
 211 (PDB ID: 6VXX) (coverage of wildtype spike constructs shown in Figure 2-figure supplement 1-2, differences in  
 212 deuterium exchange for wildtype 2P and 6P constructs shown in Figure 2-figure supplement 3). White denotes low  
 213 deuterium exchange and shades of red denote high deuterium exchange. (B) Differences in deuterium exchange  
 214 ( $\Delta$ RFU) ( $t = 10$  min) for wildtype S protein after a 3 h incubation at 37 °C minus unincubated wild type S protein were  
 215 mapped onto the S protein structure (PDB ID: 6VXX). Shades of blue correspond to decreased deuterium uptake and  
 216 shades of red correspond to increased deuterium uptake. (C-E) Stacked mass spectra for wildtype S peptides 553-568,  
 217 899-913, and 988-998 with undeuterated reference spectra, 1 min and 10 min exchange (left to right). For each peptide,  
 218 the top row contains spectra for unincubated wild type S and the bottom row contains spectra for wild type S protein  
 219 that was incubated for 3 h at 37 °C for 3 h. (F) Differences in deuterium exchange (deuterons) mapped at peptide  
 220 resolution from N to C terminus for wild type S incubated for 3 h at 37 °C minus unincubated wildtype S are shown



221 in difference plots for 1, 2, and 10 min exchange. Blue boxes correspond to significantly protected peptides and red  
222 boxes correspond to significantly deprotected peptides. Significance was determined by peptide level significance  
223 testing ( $p < 0.01$ , Figure 2-figure supplement 4-5).

224

225 Several peptides showed spectral broadening reflective of ensemble behavior in S protein  
226 in solution (Table S2). Resolvable bimodal mass spectral distributions were evident for peptides  
227 899-913 (Table 1A) and 988-998 (Table 1B). Bimodal deuterium exchange spectra are attributable  
228 to EX1 deuterium exchange kinetics with comparable rates of protein refolding and observed rates  
229 of deuterium exchange ( $k_{obs}$ ) (Kaltashov & Eyles, 2002; Weis et al., 2006). We infer that the basis  
230 for the bimodal exchange at peptides 899-913 and 988-998 that we observed in our HDXMS  
231 experimental timescales are indicative of localized trimer-protomer transitions at the interprotomer  
232 interface. Stabilization resulting from 3h 37 °C incubation is reversible. Replicate analysis of 37  
233 °C stabilized S trimers with incubation at 4 °C prior to deuterium exchange (see methods) showed  
234 a time dependent reversal of stabilization as reported previously (Costello et al., 2022), most  
235 evident at the same peptides. These results highlight temperature sensitive reversible contacts at  
236 the edge of a trimer interface core or trimer stalk region. This region encompasses a long central  
237 helical segment (987-1031) and a helix flanking the heptad repeats (900-913) (Walls et al., 2020).

238 **Table 1.**

**A**

| 899-913        | Time (min) | Left Centroid (m/z) | Right Centroid (m/z) | Left % | Right % |
|----------------|------------|---------------------|----------------------|--------|---------|
| Unincubated WT | 10         | 844.0               | 846.6                | 33.9   | 66.1    |
| Incubated WT   | 10         | 844.3               | 847.2                | 59.3   | 40.7    |
| D614G          | 10         | 843.9               | 845.6                | 90.4   | 9.6     |

**B**

| 988-998        | Time (min) | Left Centroid (m/z) | Right Centroid (m/z) | Left % | Right % |
|----------------|------------|---------------------|----------------------|--------|---------|
| Unincubated WT | 10         | 429.1               | 430.9                | 37.4   | 62.6    |
| Incubated WT   | 10         | 429.0               | 430.7                | 62.0   | 38.0    |
| D614G          | 10         | 643.1               | 644.8                | 90.6   | 9.4     |

239 **Table 1. Bimodal distributions for mass spectral envelopes of deuterium exchange in peptides 899-913 and 988-**  
240 **998.** The left and right centroids are in mass/charge (m/z). The percentages describe the relative abundances of low  
241 (left) and high (right) exchanging populations. (A) Peptide 899-913 (B) Peptide 988-998.  
242

## 243 **Global conformational changes conferred by the D614G substitution**

244 One of the earliest conserved mutations identified in emergent variants was D614G  
245 (Pandey et al., 2021) which demonstrated increased viral fitness along with enhanced furin  
246 proteolytic cleavage (Gobeil et al., 2021). To measure the impact of this mutation upon S  
247 dynamics, we compared HDXMS of D614G S with wild-type S. Comparative HDXMS between  
248 D614G and wild-type S protein (2P constructs) was carried out using our previously established  
249 37 °C temperature incubation (3h) treatment to compare equivalent trimer stabilized states. No  
250 peptides spanning the D614G mutation site were identified and therefore all peptides analyzed  
251 were common to both wild-type and D614G S. 132 non-glycosylated pepsin fragment peptides  
252 were identified covering 47.3% of the D614G sequence (Figure 3-figure supplement 1).

253 Relative fractional uptake values for the D614G variant mapped onto an S trimer structure  
254 (PDB 6VXX) for Dex = 10 min showed a similar relative deuterium exchange profile to that for  
255 WT S. The central stalk region showed lower exchange relative to the peripheral surface accessible  
256 regions consistent with it forming the stable core of the trimer (Fig. 3A). A difference map (D614G  
257 minus wild type) (Dex =10 min) (Fig. 3B) revealed three non-contiguous clusters of peptides distal  
258 to D614G site of mutation, showing following differences in exchange: i) Decreased exchange at  
259 trimer interface and ii) Increased exchange at NTD and iii) increased exchange in heptad repeat  
260 segments.

261  
262  
263  
264  
265  
266  
267  
268  
269



270 **Fig 3.**

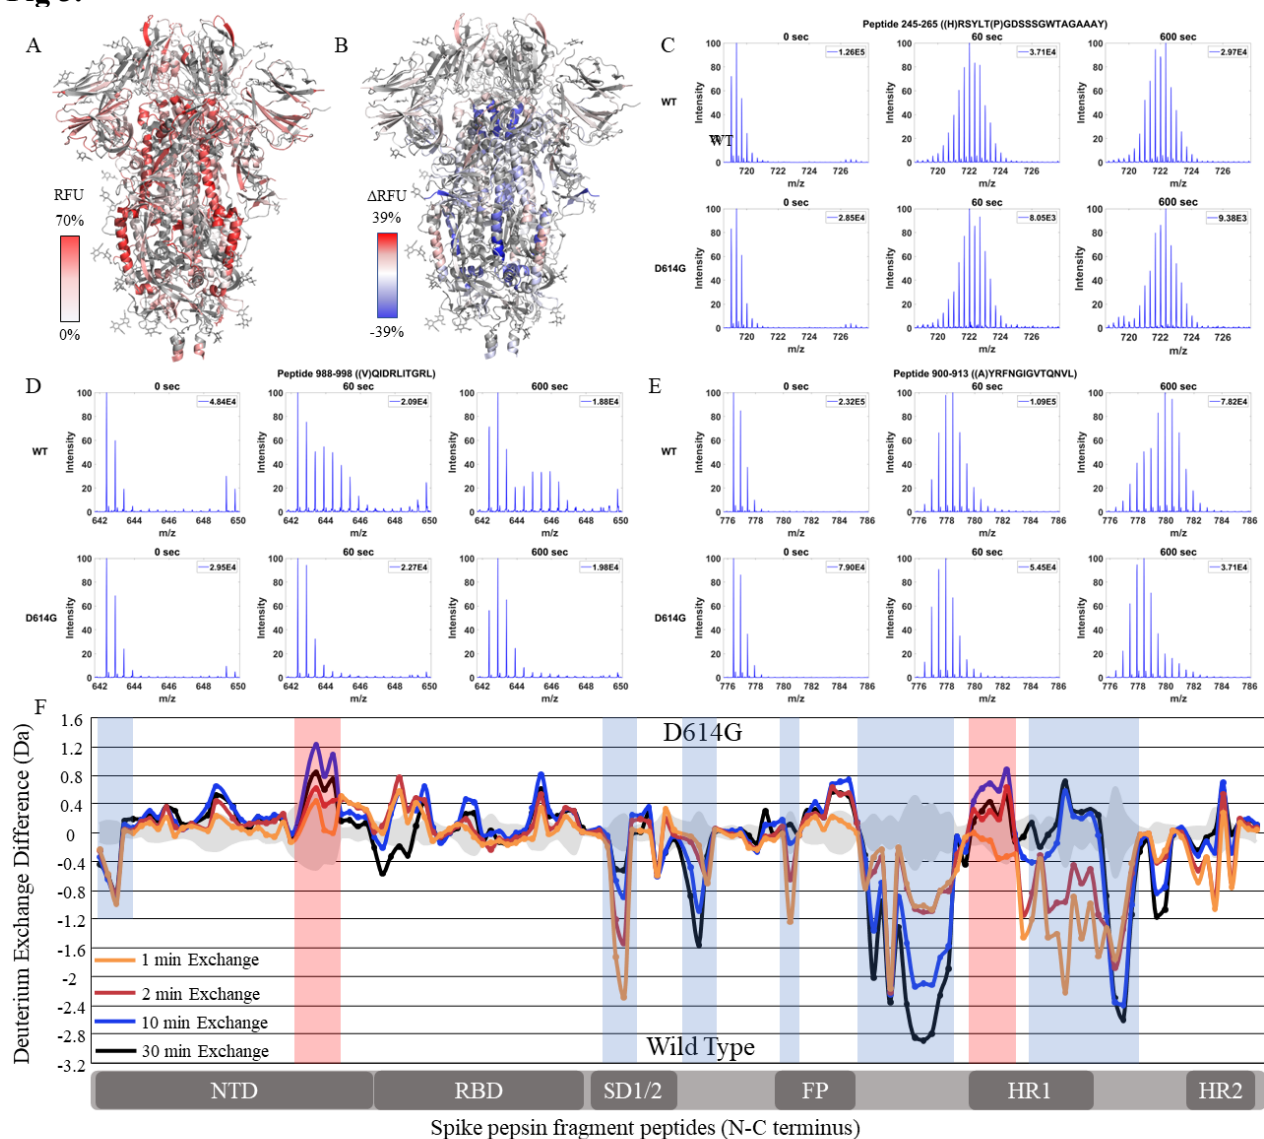

271  
 272 **Fig. 3. The D614G mutation imparts stabilization on S trimer stalk and leads to increased NTD dynamics.**  
 273 **(A)** Relative fractional uptake ( $t = 10$  min) for D614G S protein mapped onto an S protein structure (PDB ID: 6VXX)  
 274 (coverage maps shown in Figure 3-figure supplement 1-2, differences in deuterium exchange for D614G S incubated  
 275 at 37°C minus D614G S without incubation is shown in Figure 3-figure supplement 3). Shades of white correspond to  
 276 low deuterium exchange and shades of red correspond to high deuterium exchange. **(B)** Differences in deuterium  
 277 exchange ( $\Delta$ RFU) ( $t = 10$  min) for D614G S minus wild type S protein were mapped onto an S protein structure (PDB  
 278 ID: 6VXX). Shades of blue correspond to decreased deuterium uptake and shades of red correspond to increased  
 279 deuterium uptake. **(C-E)** Stacked mass spectra for wildtype S peptides 245-265, 900-913, and 988-998  
 280 with undeuterated reference spectra, 1 min and 10 min exchange (left to right). For each peptide, the top row contains  
 281 spectra for wildtype S and the bottom row contains spectra for D614G S. **(F)** Differences in deuterium exchange  
 282 (deuterons) mapped at peptide resolution from N to C terminus for D614G minus wildtype S are shown in difference  
 283 plots for 1, 2, 10, and 30 min exchange. Blue boxes correspond to significantly protected peptides and red boxes  
 284 correspond to significantly deprotected peptides. Significance was determined by peptide level significance testing  
 285 ( $p < 0.01$ , Figure 3-figure supplement 4). Back exchange for D614G is estimated in Figure 3-figure supplement 5.

## 286 **Decreased exchange at the trimer stalk region in D614G**

287 Deuterium exchange difference plots showed a small subset of contiguous peptides from  
288 three regions within the trimer stalk region that showed the largest magnitude protection in  
289 deuterium exchange (Dex = 1 min) in the D614G variant (Fig. 3C, Figure 3-figure supplement 4).  
290 These regions also showed decreased exchange upon a 3 h incubation at 37 °C (Table 2).  
291 Representative peptides 899-913, 988-998, and 1013-1021 are reporters for deuterium exchange  
292 at the stalk region (Table 2). A similar trend with decreased exchange in this locus with  
293 temperature incubation was seen with D614G S as with wild-type S (Figure 3-figure supplement  
294 2-3). Incubating D614G S for 3 h at 37 °C resulted in a smaller degree of stabilization compared  
295 to the 3 h 37 °C incubation of WT S (Figure 3-figure supplement 3). These are consistent with  
296 stabilization observed previously for D614G (Edwards et al., 2021).

297

298 **Table 2.**

| Peptide   | Sequence        | Incubated WT –<br>Unincubated WT<br>( $\Delta$ Ex) | Incubated D614G-<br>Unincubated WT<br>( $\Delta$ Ex) | Incubated D614G –<br>Incubated WT<br>( $\Delta$ Ex) |
|-----------|-----------------|----------------------------------------------------|------------------------------------------------------|-----------------------------------------------------|
| 899-913   | MAYRFNGIGVTQNVL | -0.4 $\pm$ 0.3 Da                                  | -1.4 $\pm$ 0.4 Da                                    | -1.0 $\pm$ 0.4 Da                                   |
| 988-998   | VQIDRLITGRL     | -0.5 $\pm$ 0.3 Da                                  | -1.7 $\pm$ 0.3 Da                                    | -1.2 $\pm$ 0.3 Da                                   |
| 1013-1021 | AEIRASANL       | -0.1 $\pm$ 0.1 Da                                  | -0.5 $\pm$ 0.1 Da                                    | -0.4 $\pm$ 0.1 Da                                   |

299

300 **Table 2. Magnitude of deuterium exchange protection conferred by D614G is greater than that by temperature**  
301 **stabilization.** Differences in exchange (Dex =1 min) with temperature incubation for WT compared to D614G  
302 mutation for peptides from Spike trimer.

303

304 We further observed a spectral broadening of deuterium exchange in stalk peptides in wild-  
305 type S and a more resolvable bimodal distribution was observed for peptides 899-913 and 988-998  
306 at 10 and 30 min (table S2). Peptide 899-913 lies near the base of the trimer stalk relative to RBD  
307 and exhibits a slow conformational interconversion (time scale  $\sim$  15-30 min) in which inter-  
308 protomer contacts are broken (high exchanging population) and then reassociate (low exchanging

309 population). Consequently, deuterium exchange protection in mutants observed at time points later  
310 than  $D_{ex} = 1$  min directly correlates with the rate of reversible localized trimer dissociation (Table  
311 2). The increased strength of interprotomer contacts observed after 1 min deuterium exchange are  
312 consistent with slower transitions and a higher proportion of trimer conformations with well-  
313 formed interprotomer contacts in S variants. The protection observed after 10 and 30 min exchange  
314 is a function of increased inherent stability combined with a shift in ensemble of trimer to favor a  
315 more stable, lower exchanging conformation (Table 1). The D614G variant showed lower  
316 deuterium exchange overall indicating stronger interprotomer contacts.

### 317 **Increased exchange in NTD in D614G S**

318 A striking difference in D614G not found upon 37 °C stabilization of wild-type S was  
319 observed in the NTD peptides (peptides spanning regions 177-191 and 243-265) (Fig. 3C, table  
320 S3), each of which showed increased exchange relative to wild-type S. This revealed that the single  
321 point mutation at D614 to glycine induced long range allosteric effects that are propagated across  
322 the trimer and are associated with both stalk stabilization and increased S1 domain dynamics at  
323 the NTD. These were the only loci outside the heptad repeats and across the S1 and S2 domains to  
324 show significant differences as shown in a Woods plot ( $p < 0.01$ ) (Figure 3-figure supplement 4) in  
325 deuterium exchange between wild-type and D614G at non-glycosylated and observed peptides.  
326 These effects provided a baseline for tracking conformational changes in S protein in emergent,  
327 more transmissible variants. The large conformational changes elicited by the D614G mutation  
328 underscore its importance as a highly conserved mutation across emergent variants (Aleem et al.,  
329 2022).

330

331 **Alpha variant S shows increased exchange relative to D614G at both trimer stalk and NTD**

332 We extended our analysis of D614G to variants of concern that each carried this mutation  
333 together with multiple other mutations (Fig. 1), comparing each subsequent variant with its  
334 epidemiological predecessor to track changes in deuterium exchange across the timeline of  
335 emergence. 45.9% coverage was obtained with 127 non-glycosylated pepsin fragment peptides  
336 common to D614G, Alpha, and wild-type S for a comparative HDXMS (Dex = 1-30 min) analysis  
337 of the Alpha variant S versus D614G S (Figure 4-figure supplement 1). Relative fractional uptake  
338 for the Alpha variant was mapped onto a wild type S structure (PDB 6VXX) (Fig. 4A). Differences  
339 in deuterium uptake ( $\Delta$ RFU) for the Alpha variant S minus D614G S are mapped onto PDB 6VXX  
340 in Fig. 4B. The Alpha variant S showed lower magnitude changes in deuterium exchange relative  
341 to D614G than D614G showed compared to wildtype, particularly in the stalk region. Changes in  
342 deuterium exchange were primarily observed at the NTD for common peptides (Figure 4-figure  
343 supplement 2).

344

345

346

347

348

349

350

351

352

353

354 **Fig. 4.**

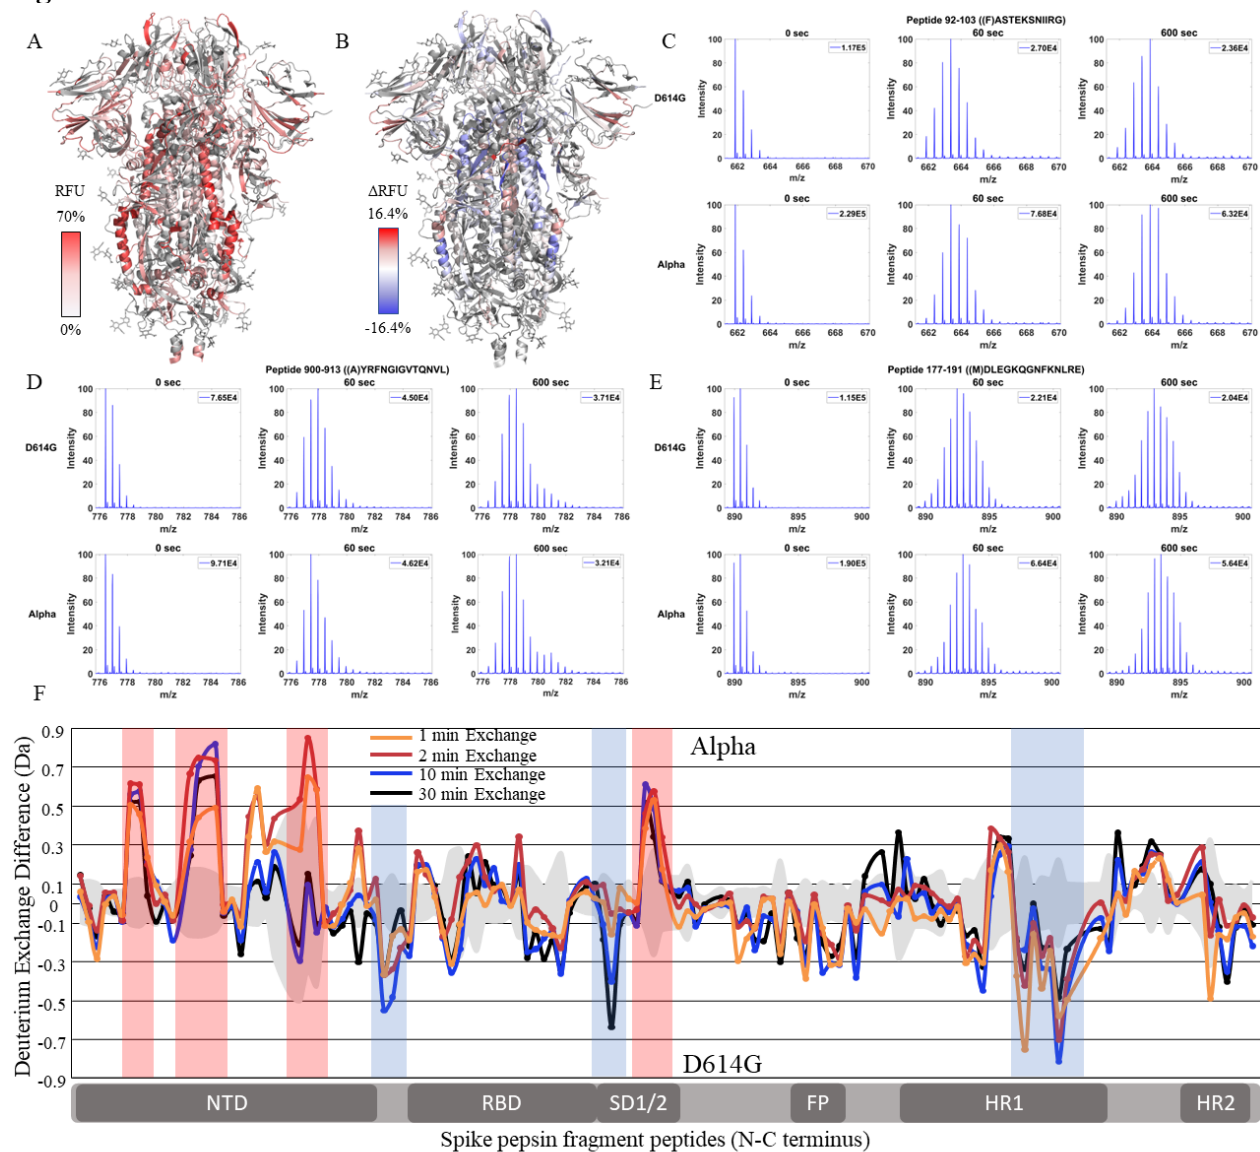

355 **Fig. 4. The Alpha S show significantly increased NTD dynamics.** (A) Relative fractional uptake ( $t = 10$  min) for  
 356 Alpha S protein mapped onto an S protein structure with three down RBDs (PDB ID: 6VXX) coverage map is shown  
 357 in Figure 4-figure supplement 1). Shades of white correspond to low deuterium exchange and shades of red correspond  
 358 to high deuterium exchange. (B) Differences in deuterium exchange ( $\Delta$ RFU) ( $t = 10$  min) for Alpha S protein minus  
 359 D614G S protein were mapped onto an S protein structure (PDB ID: 6VXX). Shades of blue correspond to decreased  
 360 deuterium uptake and shades of red correspond to increased deuterium uptake. (C-E) Stacked mass spectra for  
 361 wildtype S peptides 92-103, 177-191, and 900-913 with undeuterated mass spectral envelope as reference, 1 min and  
 362 10 min exchange (left to right). For each peptide, the top row contains spectra for D614G S and the bottom row  
 363 contains spectra for Alpha S. (F) Differences in deuterium exchange (deuterons) mapped at peptide resolution from  
 364 N to C terminus for Alpha S minus D614G S are shown in difference plots for 1, 2, 10, and 30 min exchange. Blue  
 365 boxes correspond to significantly protected peptides and red boxes correspond to significantly deprotected peptides.  
 366 Significance was determined by peptide level significance testing ( $p < 0.01$ , Figure 4-figure supplement 2).

368

369 In the trimer stalk region for the Alpha S, changes in deuterium exchange in Alpha relative  
370 to D614G S proteins were far lower in magnitude than in D614G relative to wildtype in the trimer  
371 stalk region. The trimer stalk region in particular showed no differences relative to wild-type S,  
372 with peptides 900-913 and 990-998 showing a small magnitude increase in deuterium exchange  
373 (0.2-0.3D) (Table 3). This indicated that a bulk of the stabilization of the stalk region in the Alpha  
374 S protein was contributed by the conserved D614G mutation.

375

376 **Table 3.**

| Peptide   | Sequence       | Alpha – D614G<br>( $\Delta Ex$ ) | Delta – D614G<br>( $\Delta Ex$ ) | Omicron –<br>D614G ( $\Delta Ex$ ) |
|-----------|----------------|----------------------------------|----------------------------------|------------------------------------|
| 900-913   | AYRFNGIGVTQNVL | -0.1 $\pm$ 0.4 Da                | -0.3 $\pm$ 0.4 Da                | -0.3 $\pm$ 0.4 Da                  |
| 990-998   | IDRLITGRL      | 0.1 $\pm$ 0.3 Da                 | -0.2 $\pm$ 0.3 Da                | -0.2 $\pm$ 0.3 Da                  |
| 1013-1021 | AEIRASANL      | 0.2 $\pm$ 0.2 Da                 | 0 $\pm$ 0.1 Da                   | 0 $\pm$ 0.1 Da                     |

377

378 **Table 3. Deuterium Exchange protection at trimer stalk peptides in variants relative to D614G S.**

379

380 Outside the stalk, a lower magnitude decrease in exchange was observed in the S2 domain  
381 specifically at peptides at the C-terminal end of heptad repeat 1 in the 940-975 region ( $\Delta Ex = 0.4$ -  
382 0.8 D) as well as peptide 553-568 ( $\Delta Ex = 0.6$  D), which mediates inter-monomer  
383 contacts. Interestingly, the largest changes were observed in the NTD. The Alpha S showed  
384 increased exchange at peptides spanning 92-103, 177-191, and 201-264 (table S3).

### 385 **Delta variant S shows decreased exchange at both the trimer stalk and NTD**

386 Comparative HDXMS of the Delta variant S to the Alpha S generated 47.0% coverage  
387 was obtained with 123 non-glycosylated pepsin fragmentation peptides common to D614G and  
388 the Delta and Alpha S variants (Figure 5-figure supplement 1). RFU for Dex = 1 min in the Delta

389 variant and differences in exchange for Delta S minus Alpha S ( $\Delta$  RFU) were mapped onto an S  
390 structure (PDB: 6VXX) (Fig. 5A, B). Delta S showed mostly decreased exchange relative to the  
391 Alpha S with decreases primarily in the trimer stalk, other S2 domain peptides, and the NTD (Fig.  
392 5C-E). Delta S showed decreased exchange in trimer stalk peptides relative to Alpha S (Table 3).  
393 In the S2 domain, additional decreases in exchange were observed at regions 820-830 ( $\Delta$ Ex =  
394 0.7D) corresponding to the fusion peptide and 900-940 ( $\Delta$ Ex = 1.2D) corresponding to the N-  
395 terminal end of heptad repeat 1. Based on Woods plots analyses ( $p < 0.01$ ), insignificant differences  
396 in deuterium exchange were observed for other S2 peptides relative to Alpha (Figure 5-figure  
397 supplement 2).

398 Delta S also showed decreased exchange for NTD peptides relative to Alpha S. Decreased  
399 exchange was most prominent at peptides spanning 92-103, 177-191, and 200-265 (Table S3).  
400 Additional decreases in exchange were observed at 306-317 ( $\Delta$ Ex = 0.6D) while increased  
401 exchange was observed at the RBD peptide 453-467 ( $\Delta$ Ex = 0.6D). Incremental decreases in  
402 exchange at the trimer stalk were in addition to a bulk stabilization imparted by the D614G  
403 mutation while decreased exchange in the NTD represented a reversal of the increased NTD  
404 exchange observed in Alpha S.

405

406

407

408

409



410

411 **Fig. 5.**

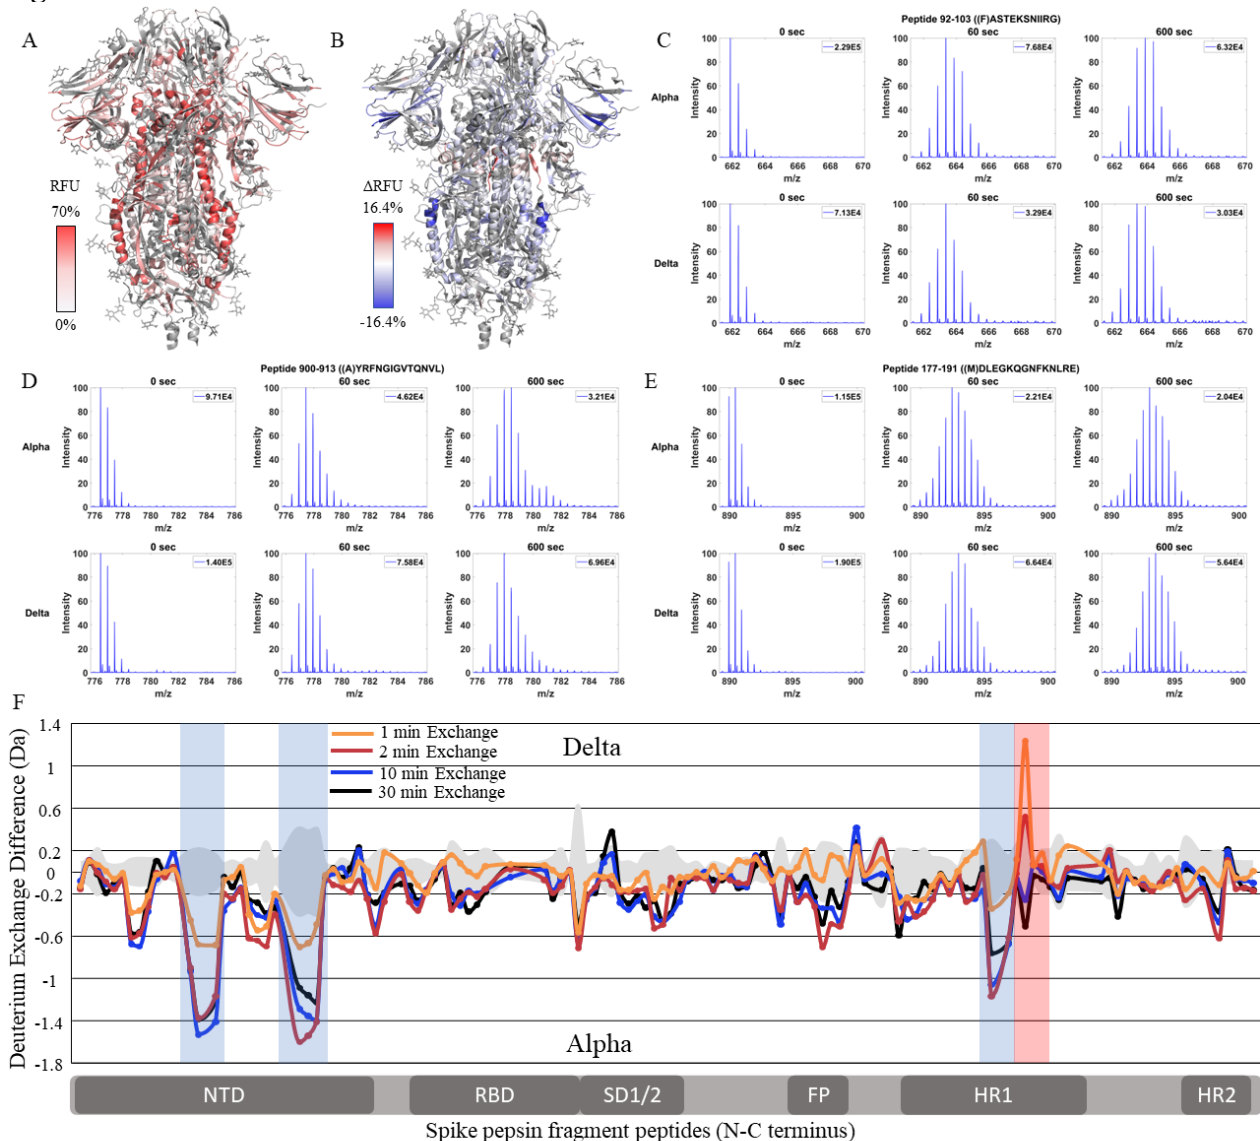

412

413 **Fig. 5. The Delta variant show increased stability with decreased NTD dynamics.** (A) Relative fractional uptake  
 414 (t = 10 min) for Delta S protein mapped onto an S protein structure with three down RBDs (PDB ID: 6VXX) coverage  
 415 maps shown in Figure 5-figure supplement 1). Shades of white correspond to low deuterium exchange and shades of  
 416 red correspond to high deuterium exchange. (B) Differences in deuterium exchange (ΔRFU) (t = 10 min) for Delta S  
 417 minus Alpha S were mapped onto an S protein structure (PDB ID: 6VXX). Shades of blue correspond to decreased  
 418 deuterium uptake and shades of red correspond to increased deuterium uptake. (C-E) Stacked mass spectra for  
 419 wildtype S peptides 92-103, 177-191, and 900-913 with undeuterated reference spectra, 1 min and 10 min exchange  
 420 (left to right). For each peptide, the top row contains spectra for Alpha S and the bottom row contains spectra for Delta  
 421 S. (F) Differences in deuterium exchange (deuterons) mapped at peptide resolution from N to C terminus for Delta  
 422 S minus Alpha S are shown in difference plots for 1-, 2-, 10-, and 30-min exchange. Blue boxes correspond to  
 423 significantly protected peptides and red boxes correspond to significantly deprotected peptides. Significance was  
 424 determined by peptide level significance testing (p<0.01, Figure 5-figure supplement 2).

425



426 **Omicron BA.1 S variant retains low exchange at the trimer stalk while showing increased**  
427 **deuterium exchange at NTD peptides**

428 Finally, we compared Omicron BA.1 S to Delta S. 36.4% coverage was achieved with 98  
429 non-glycosylated pepsin fragment peptides common to D614G, Delta and Omicron BA.1 S  
430 proteins (Figure 6-figure supplement 1). RFU for Dex = 1 min in Omicron BA.1 S and differences  
431 in exchange for Omicron BA.1 S minus Delta S ( $\Delta$  RFU) were mapped onto an S structure (PDB:  
432 6VXX) (Fig. 6A, B). It should be noted that the Omicron BA.1 variant used for analysis was the  
433 6P construct, necessitated by poor expression and heterogeneity of the 2P construct of Omicron  
434 BA.1 S. Based on our analysis of wildtype S, the 2P and 6P constructs showed no differences in  
435 HDXMS. The Omicron BA.1 S showed slightly decreased exchange at the trimer stalk with  
436 increased exchange at other S2 domain peptides, and increased exchange in the NTD (Fig. 6C-E).

437 A small additional decrease in exchange was observed for peptides spanning the trimer  
438 stalk (Table 3). Notably, the Omicron BA.1 S showed a decrease in the higher exchanging  
439 population for stalk peptides suggesting both an impact on inherent trimer stability and ensemble  
440 behavior. In S2 domain peptides spanning 920-988 ( $\Delta$ Ex = 0.5-1.5D), 818-830 ( $\Delta$ Ex = 0.4-0.8D),  
441 and 750-756 ( $\Delta$ Ex = 0.6D), increased exchange was observed (Figure 6-figure supplement 2).

442 In the NTD, significantly increased exchange was observed in Omicron BA.1 S relative to  
443 Delta S. Increases were seen at peptides spanning 177-191, 243-265, and 306-317 (table S3).  
444 Additional increases in exchange were observed for RBD peptide 456-467 ( $\Delta$ Ex = 0.5D) and  
445 peptides 553-568 ( $\Delta$ Ex = 0.5D) and 627-643 ( $\Delta$ Ex = 0.5D). Omicron BA.1 S was distinct from  
446 the Alpha and Delta S proteins in that it adhered to the continued trend of decreased exchange at  
447 the trimer stalk and increased exchange in the NTD that were first observed in D614G S.

448 **Fig. 6.**

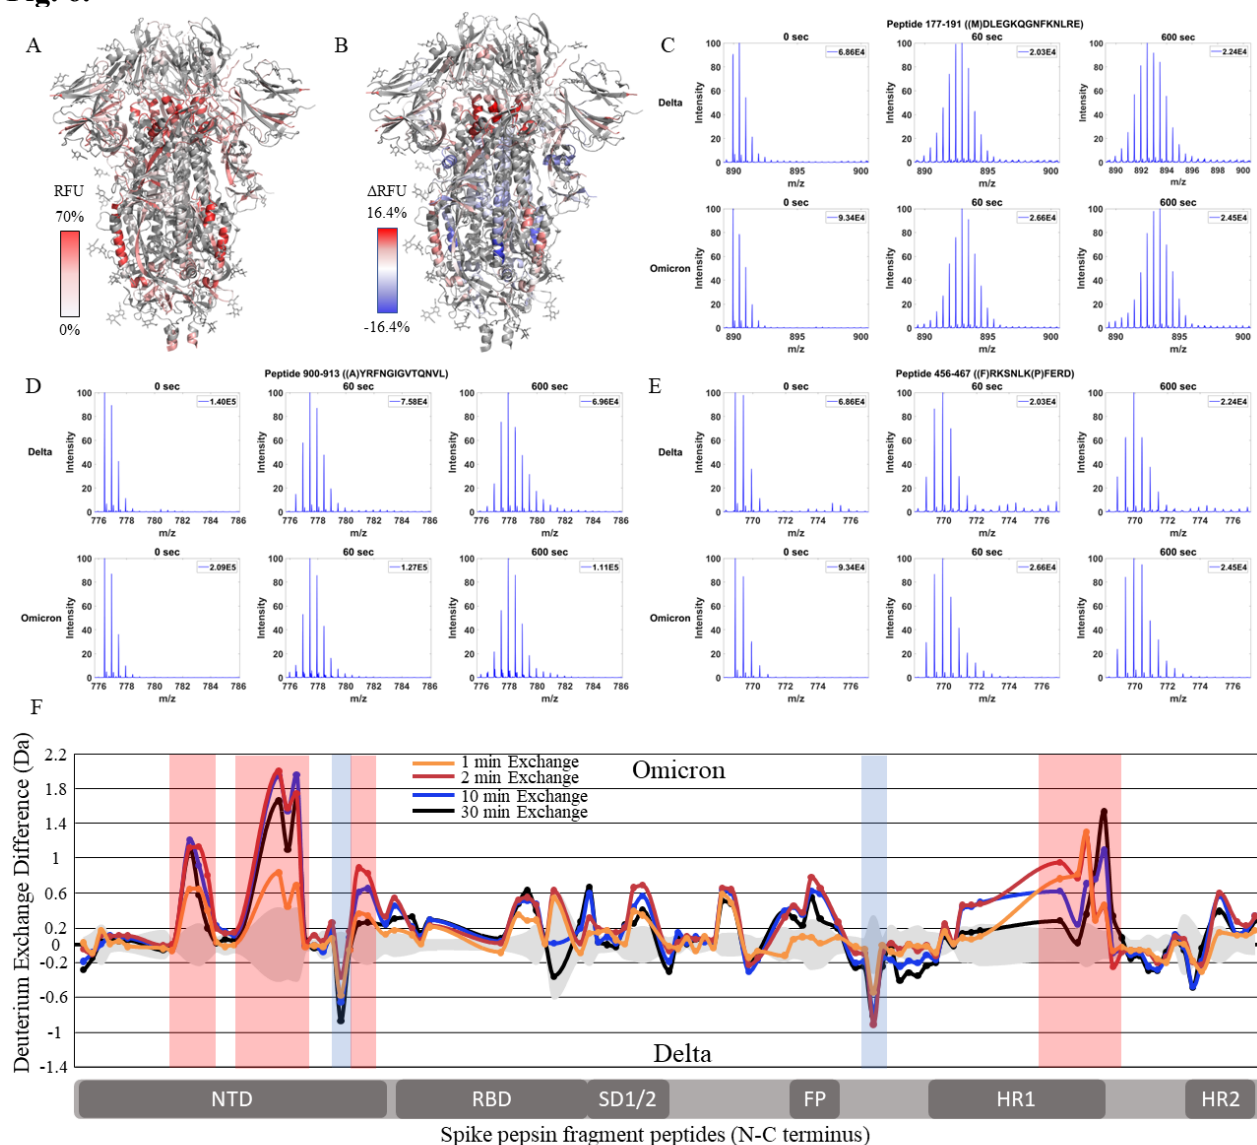

449

450 **Fig. 6. The Omicron BA.1 S shows high magnitude trimer stability and NTD dynamics.** (A) Relative fractional  
 451 uptake ( $t = 10$  min) for Omicron BA.1 S mapped onto an S protein structure with three down RBDs (PDB ID: 6VXX)  
 452 coverage maps shown in Figure 6-figure supplement 1). Shades of white correspond to low deuterium exchange and  
 453 shades of red correspond to high deuterium exchange. (B) Differences in deuterium exchange ( $\Delta$ RFU) ( $t = 10$  min)  
 454 for Omicron BA.1 S minus Delta S were mapped onto an S protein structure (PDB ID: 6VXX). Shades of blue  
 455 correspond to decreased deuterium uptake and shades of red correspond to increased deuterium uptake. (C-E) Stacked  
 456 mass spectra for wildtype S peptides 92-103, 177-191, and 900-913 with undeuterated reference spectra, 1 min and  
 457 10 min exchange (left to right). For each peptide, the top row contains spectra for Delta S and the bottom row contains  
 458 spectra for Omicron BA.1 S. (F) Differences in deuterium exchange (deuterons) mapped at peptide resolution from N  
 459 to C terminus for Omicron BA.1 S minus Delta S are shown in difference plots for 1-, 2-, 10-, and 30-minute exchange.  
 460 Blue boxes correspond to significantly protected peptides and red boxes correspond to significantly deprotected  
 461 peptides. Significance was determined by peptide level significance testing ( $p < 0.01$ , Figure 6-figure supplement 2).

462

463

464

## 465 **Discussion**

466 **Changes in S conformation: Implications for viral fitness:** We report two uncorrelated effects  
467 of mutations upon the conformational dynamics of variant S proteins. One of the striking  
468 observations from our comparative HDXMS analysis is the progressive stabilization of the S trimer  
469 with successive emergent S variants from D614G through Alpha and Delta and subsequently to  
470 Omicron BA.1 at the S trimer stalk region. Ensemble behavior is clearly evident from HDXMS of  
471 3 representative peptides from wild-type S. The ensemble shifted to favor a more stable  
472 conformation upon incubation at 37 °C. Interestingly, the sequences of the 3 peptides examined in  
473 the stalk region adopt an amphipathic helical fold (Figure 7-figure supplement 1). Cold sensitivity  
474 followed by spike stabilization at higher temperatures (37°C) can be attributed to the hydrophobic  
475 interactions at the stalk region that contribute to stability at the trimer interface (Costello et al.,  
476 2022; Edwards et al., 2021; Privalov, 1990).

477 A first mutation to confer a large stabilization effect was D614G, a lynchpin S mutation,  
478 which appeared early during the pandemic and is conserved across nearly all recent emergent  
479 SARS-CoV-2 variants of concern (Pandey et al., 2021). Stabilization (associated with decreased  
480 exchange) at this stalk locus region showed a leveling off with Delta S (Figure 7-figure supplement  
481 2). Comparative analysis of peptides encompassing mutations in variant S with D614G S further  
482 validated D614G being the most prominent contributor to enhanced trimer stabilization (Table  
483 S4). However, enhancement in NTD/RBD dynamics appeared more pronouncedly in Omicron  
484 BA.1 S protein. Importantly, incubation at 37 °C generated a stabilization in the stalk region but  
485 did not elicit any changes at the NTD/RBD, indicating that stalk stabilization and enhancement of  
486 NTD/RBD dynamics are uncorrelated conformational effects.

487 Early studies on spike trimers from HIV-1, MERS, and SARS-CoV (Derking & Sanders,  
488 2021; Kirchdoerfer et al., 2018; Pallesen et al., 2017) highlighted analogous stem loci to comprise  
489 a conformational dynamic switch to toggle from prefusion to postfusion conformations. To  
490 overcome the conformational heterogeneity in SARS-CoV and MERS spike trimers, 2 consecutive  
491 proline substitutions were shown to confer improved expression of prefusion trimers (Kirchdoerfer  
492 et al., 2018; Pallesen et al., 2017). These mutations were extended to SARS-CoV-2 S protein. The  
493 SARS-CoV-2 2P constructs were also found to be more immunogenic, making it a preferred  
494 construct for vaccine development (Hsieh et al., 2021; Lien, Kuo, et al., 2021; Lien, Lin, et al.,  
495 2021). Mutations introduced on a 2P background were screened for improved expression and 4  
496 additional proline substitutions were identified. These formed the basis for the hexapro (6P) (Hsieh  
497 et al., 2020) substitution construct also widely used for structural and biophysical characterization  
498 of S. Interestingly, one of the loci where we observed the biggest stabilization in D614G and  
499 successive emergent variants is at this locus. A peptide directly C-terminal to the 2P substitutions,  
500 988-998, showed ensemble behavior across S proteins from all variants examined in this study.  
501 Omicron BA.1 S showed the highest stabilization at this locus. These independent effects of  
502 structure-guided mutations and effects from emergent variants confirm an evolutionary advantage  
503 that stabilization of the S trimer stalk region conferred SARS-CoV-2.

504 **Increasing transmissibility (viral fitness) correlates with more stable trimer and dynamic**  
505 **NTD.** Increased transmissibility is a defining feature of S across SARS-CoV-2 variants, with  
506 the Omicron BA.1 showing the fastest rate of infection spread (Araf et al., 2022; Y. Liu et al.,  
507 2022; Plante et al., 2021; Ulrich et al., 2022). It should be noted that increased transmissibility as  
508 assessed from the above referenced *in vitro* studies examining infection of cell lines does not  
509 linearly extrapolate to transmissibility in human populations. Comparative HDXMS revealed large

510 scale changes in S conformation across variants. We surmise that these conformational changes  
511 would majorly impact multiple functions of the S protein including ACE2 recognition and binding,  
512 proteolytic processing by furin-like proteases and TMPRSS2, and efficiency of membrane fusion.  
513 The conformational changes identified from changes in deuterium exchange encompassed  
514 increased compactness of a central stalk region and variable changes across NTD and RBD  
515 regions. Increased transmissibility could be attributable at least in part to a combination of the  
516 above conformational changes observed across S variants.

517 Comparative HDXMS of S variants relative to wild-type S at conserved amino acids  
518 revealed that the largest magnitude decreases in exchange were entirely localized to the S2 subunit  
519 (Fig. 3). One of the striking features are three key pepsin fragment peptides that are structurally  
520 non-contiguous and showed the largest decreases in exchange as well as a progressive shift in  
521 ensemble behavior that correlate with timeline of emergence. These 3 peptides spanning the stalk  
522 region represent critical trimer interface loci for maintaining a canonical prefusion conformational  
523 ensemble (Fig. 7A). Each of these 3 peptides showed differences in magnitude of protection across  
524 variants relative to wild-type S in the timescales of HDXMS ( $t=1-30$  min) (Fig. 7B).

525 HDXMS clearly demonstrates that not all mutations elicit equivalent changes in  
526 conformation/stability, some mutations have disproportionately larger impacts on overall S and  
527 trimer conformational interconversion and stability. However, non-linear improvements in trimer  
528 stability beyond that conferred by the D614G mutation likely contribute to improved efficacy in S  
529 trimer packaging on the SARS-CoV-2 virion. Due to the multiplicative effects of trimer stability  
530 on S functions, we postulate that the enhanced stability beyond that conferred by the D614G  
531 mutation could account for some of the increased viral fitness observed in Delta and Omicron  
532 BA.1 variants (Fig. 7B).

533 **Fig. 7.**

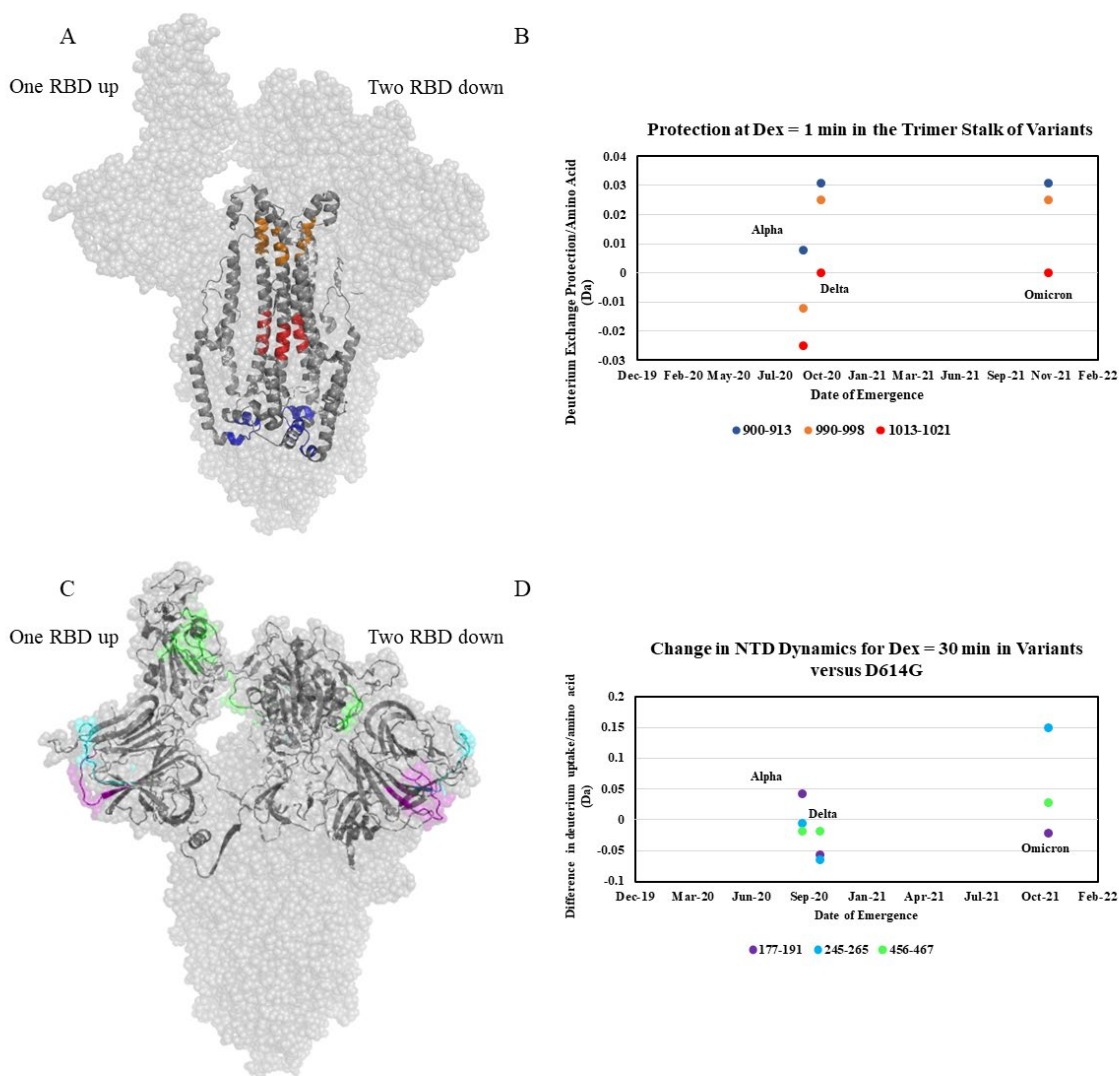

534  
 535 **Fig. 7. Increased trimer stability and NTD dynamics correlate with the timeline of emergence.** (A) Trimer stalk  
 536 peptides 900-913 (blue), 990-998 (orange) and 1013-1021 (red) mapped onto a wildtype S protein structure (PDB ID:  
 537 7TGX) (helical wheel analysis of stalk peptides shown in Figure 7-figure supplement 1). (B) Protection in trimer stalk  
 538 peptides in S variants compared to D614G S plotted as protection per amino acid versus date of emergence at Dex =  
 539 1 min. (C) NTD and RBD peptides showing increased dynamics in the timeline of variant emergence mapped onto a  
 540 1 RBD ‘up’ wildtype S structure (PDB ID: 7TGX). Peptides 177-191, 245-265, and 456-467 are shown in purple,  
 541 cyan, and green, respectively. (D) Changes in deuterium uptake for NTD and RBD peptides in variant S proteins  
 542 compared to D614G S at Dex = 30 min are plotted as change in deuterium uptake versus date of emergence (additional  
 543 plots in Figure 7-figure supplement 2).

544

545 Additionally, we mapped increases in dynamics at the NTD and RBD in the S1 subunit,  
 546 with Omicron BA.1 S showing the highest overall NTD and RBD dynamics (Fig. 7 C and D).



547 These changes are likely associated with the role of NTD and RBD dynamics in promoting  
548 improved ACE2 recognition and correspondingly increased viral entry across successive variants  
549 (Qing et al., 2021). Increased NTD dynamics might facilitate RBD ‘up’ transitions. This, coupled  
550 with mutations at the S-ACE2 interface would then facilitate increased efficacy of SARS-CoV-2  
551 host entry. It should be noted that HDXMS reports an average deuterium exchange for an ensemble  
552 of conformations when the rates of conformational interconversion are faster relative to rates of  
553 exchange at relevant experimental conditions (Hoofnagle et al., 2003). HDXMS results mapped  
554 onto a single endstate cryo-EM structure are useful in identifying dynamic loci on the S protein.  
555 However, this leads to a distorted view of uniform changes in exchange average across  
556 conformational changes throughout the S trimer, since the endstate structure does not represent the  
557 entire conformational ensemble. HDXMS of S protein under the experimental conditions and  
558 timescales described here reports an average of up and down transitions that cannot be resolved.

559 In summary, our results localize the impacts of mutations on conformational dynamics to  
560 two specific loci: the trimer stalk region and NTD. These offer a timeline of variant emergence  
561 effects on S trimer conformational dynamics. Every successive variant S protein displays a  
562 progressive reduction in dynamics at a central stalk region in the S2 subunit and progressive  
563 increases in dynamics in NTD and RBD. The increased stability conferred by the D614G S  
564 substitution formed the basis for further optimization of S conformation through changes in NTD  
565 and heptad repeat dynamics that could have advanced overall viral fitness and transmissibility.  
566 Alpha S showed no differences at the stalk region but showed increases in NTD and RBD  
567 dynamics. Delta S showed more stabilization at the stalk region and decreased NTD dynamics.  
568 Omicron BA.1 S showed even greater stabilization of the stalk region together with increased NTD  
569 and RBD dynamics. Overall, these results suggest that while near-maximal trimer stalk stability

570 has been achieved, emerging variants continue to show progressive increases in NTD and RBD  
571 dynamics. It remains to be seen how progressive changes in stalk stabilization and enhanced NTD  
572 dynamics impact neutralization of emergent variants by antibodies generated against wild-type S.

573 Changes in stabilization and dynamics resulting from specific spike mutations detail the  
574 evolutionary trajectory of spike protein in emerging variants. This provides a basis for  
575 progressively enhanced viral fitness and carries major implications for spike evolution and  
576 neutralization.

577

578

## 579 **Materials and Methods**

580

### 581 **Expression and purification of SARS-CoV-2 S proteins**

582 Expression and purification of SARS-CoV-2 S ectodomains were performed as previously  
583 described (Barnes, Jette, et al., 2020; Barnes, West, et al., 2020). SARS-CoV-2 S constructs were  
584 composed of residues 16–1206 of the early SARS-CoV-2 isolate (GenBank MN985325.1), Alpha  
585 variant (GISAID EPI\_ISL\_601443), Delta variant (GenBank QWK65230.1), or Omicron variant  
586 (BA.1) (GISAID EPI\_ISL\_9845731) with the following stabilizing mutations: 2P (Pallesen et al.,  
587 2017) or 6P (Hsieh et al., 2020), the furin cleavage site mutated to Ala, a C-terminal TEV protease  
588 site (GSG-RENLYFQG), foldon trimerization motif (GGGSG-  
589 YIPEAPRDGQAYVRKDGWVLLSTFL), 8x-His tag (G-HHHHHHHH), and AviTag  
590 (GLNDIFEAQKIEWHE). All S constructs were expressed using the Expi293T transient  
591 transfections system (GIBCO). S trimers from clarified transfected cell supernatants were purified  
592 over HisTrap High Performance columns (Cytiva), followed by size-exclusion chromatography  
593 (SEC) using a Superose 6 increase 10 300 column (Cytiva). Fractions corresponding to S trimers  
594 were collected and concentrated in 10% glycerol TBS (20 mM Tris, 150 mM NaCl, pH 8.0) then



595 flash frozen in liquid nitrogen and stored at -80 °C. Downstream purification was completed within  
596 12 h of the transfected cell harvest to maximize the quality of trimeric, well-folded S trimers.

597

### 598 **Bottom-up proteomics and glycan profiling**

599 Recombinant S protein variants were digested with trypsin overnight. Samples were  
600 separated by RP-HPLC using a Thermo Scientific EASY-nLC™ 1200 UPLC system connected  
601 to a Thermo Scientific™ PepMap C18 column, 15 cm × 75 µm over a 90 min 5-25%, 15 min from  
602 40-95 % gradient (A: water, 0.1% formic acid; B: 80 % acetonitrile, 0.1% formic acid) at 300  
603 nL/min flow rate. The samples were analyzed on the Thermo Scientific™ Orbitrap Eclipse™  
604 Tribrid™ mass spectrometer using DDA FT HCD MS2 method. FT MS1 was acquired at  
605 resolution settings of 120K at m/z 200 and FTMS2 at resolution of 30K at m/z 200.

606 The Thermo Scientific™ Proteome Discoverer™ 2.5 software with the Byonic™ search node  
607 (Protein Metrics) were used for glycopeptide data analysis and glycoform quantification. Data  
608 were searched against a database containing the Uniprot/SwissProt entries of the model proteins  
609 with/out common contaminants and 57 human plasma glycans with a 1% FDR criteria for protein  
610 spectral matches. The peptide spectra were also manually validated to confirm identification of  
611 glycosylation sites.

612

### 613 **Deuterium exchange**

614 Labeling buffer was prepared by diluting 20X PBS in H<sub>2</sub>O in D<sub>2</sub>O (99.9%). 3 µL of sample  
615 were added to 57 µL of labeling buffer for a final labeling concentration of 90.16%. Deuterium  
616 labelling was carried out for 1, 2, 10, 30, and 100 min at 20°C using a PAL-RTC (Leap)  
617 autosampler. During automated HDXMS experiments protein samples were stored at 0 degrees

618 and stability was assessed by staggering technical replicates. After labelling, equivalent volumes  
619 of labeling reaction and prechilled quench solution (1.5 M GndHCl, 0.25 M TCEP) was added to  
620 bring the reaction to pH 2.5.

621

## 622 **Mass spectrometry and peptide identification**

623 Approximately 8-10 pmol of sample were loaded onto a BEH pepsin column (2.1 x 30  
624 mm) (Waters, Milford, MA) in 0.1% formic acid at 75  $\mu$ L/min. Proteolyzed peptides were trapped  
625 in a C18 trap column (ACQUITY BEH C18 VanGuard Pre-column, 1.7  $\mu$ M, Waters, Milford,  
626 MA). Peptides were eluted in an acetonitrile gradient (8-40%) in 0.1% formic acid on a reverse  
627 phase C18 column (AQUITY UPLC BEH C18 Column, Waters, Milford, MA) at 40  $\mu$ L/min. All  
628 fluidics were controlled by nanoACQUITY Binary Solvent Manager (Waters, Milford, MA).  
629 Electrospray ionization mode was utilized and ionized peptides were sprayed onto a SYNAPT XS  
630 mass spectrometer (Waters, Milford, MA) acquired in HDMS<sup>E</sup> Mode. Ion mobility settings of 600  
631 m/s wave velocity and 197 m/s transfer wave velocity were used with collision energies of 4 and  
632 2 V were used for trap and transfer, respectively. High collision energy was ramped from 20 to 45  
633 V while a 25 V cone voltage was used to obtain mass spectra ranging from 50-2000 Da (10 min)  
634 in positive ion mode. A flow rate of 5  $\mu$ L/min was used to inject 100 fmol/ $\mu$ L of [Glu<sup>1</sup>]-  
635 fibrinopeptide B ([Glu<sup>1</sup>]-Fib) as lockspray reference mass.

636 Peptides of wild-type and SARS CoV-2 variant S proteins were identified through  
637 independent searches of mass spectra from the undeuterated samples in two steps. First, peptides  
638 common to wild-type and variant S proteins were identified from a database containing the amino  
639 acid sequence of wild-type and D614G S using PROTEIN LYNX GLOBAL SERVER version 3.0  
640 (Waters, Milford, MA) software in HDMS<sup>E</sup> mode for non-specific protease cleavage. Search

641 parameters in PLGS were set to ‘no fixed or variable modifier reagents’ and variable N-linked  
642 glycosylation.

643 Deuterium exchange was quantitated using DynamX v3.0 (Waters, Milford, MA) with  
644 cutoff filters of: minimum intensity = 2000, minimum peptide length = 4, maximum peptide length  
645 = 25, minimum products per amino acid = 0.2, and precursor ion error tolerance <10 ppm. Three  
646 undeuterated replicates were collected for wild-type and variant S proteins, and the final peptide  
647 list includes only peptides that fulfilled the above-described criteria and were identified  
648 independently in at least 2 of the 3 undeuterated samples.

649 In the second step, the workflow was repeated to identify peptides unique to S protein  
650 variants. Pepsin fragment peptides from each variant S protein were identified from a database  
651 containing the amino acid sequence of the corresponding variant S. Deuterium exchange in these  
652 peptides were analyzed using DynamX 3.0 with identical parameters described above.

653

#### 654 **Hydrogen-Deuterium Exchange Analysis**

655 The average number of deuterons exchanged in each peptide was calculated by subtracting  
656 the centroid mass of the undeuterated reference spectra from each deuterated spectra. Peptides  
657 were independently analyzed for quality across technical replicates. Relative deuterium exchange  
658 and difference plots were generated by DynamX v3.0. Relative deuterium exchange plots are  
659 reported as RFU which is the ratio of exchanged deuterons to possible exchange deuterons. Back  
660 exchange estimates were determined by RFU values from a 24 h labeling experiment and are  
661 shown in Figure 3-figure supplement 5. Deuterios (Lau et al., 2021) was used to generate Woods  
662 plots using a peptide level significance test ( $p < 0.01$ ). The mass spectrometry proteomics data will  
663 be deposited to the ProteomeXchange Consortium via the PRIDE partner repository.

664 **Acknowledgments**

665 **Funding:**

666 Startup funding from the Pennsylvania State University (PSU) to GSA.

667 We thank Rosa Viner (Thermo Scientific, San Jose, CA) for spike protein glycan analysis.

668 **Competing interests:** All authors declare they have no competing interest.

669 **Data and Materials availability:**

670 Mass Spectrometry data: ProteomeXchange Consortium via the PRIDE partner repository

671 All data is available in the main text and supplemental information.

672 Information on recombinant proteins and reagents is available upon request

673  
674  
675  
676  
677  
678  
679  
680  
681  
682  
683  
684  
685  
686  
687  
688  
689  
690  
691  
692  
693  
694  
695  
696  
697  
698  
699  
700

701 **References**

- 702  
703  
704 Aleem, A., Akbar Samad, A. B., & Slenker, A. K. (2022). Emerging Variants of SARS-CoV-2  
705 And Novel Therapeutics Against Coronavirus (COVID-19). In *StatPearls*. StatPearls  
706 Publishing. [http://www.ncbi.nlm.nih.gov/books/NBK570580/](http://www.ncbi.nlm.nih.gov/books/NBK570580/files/774/NBK570580.html)  
707 [files/774/NBK570580.html](http://www.ncbi.nlm.nih.gov/pubmed/34033342)  
708 <http://www.ncbi.nlm.nih.gov/pubmed/34033342>  
709 Amanat, F., Strohmeier, S., Rathnasinghe, R., Schotsaert, M., Coughlan, L., Garcia-Sastre, A., &  
710 Krammer, F. (2021). Introduction of Two Prolines and Removal of the Polybasic  
711 Cleavage Site Lead to Higher Efficacy of a Recombinant Spike-Based SARS-CoV-2  
712 Vaccine in the Mouse Model. *mBio*, 12(2). <https://doi.org/10.1128/mBio.02648-20>  
713 Araf, Y., Akter, F., Tang, Y. D., Fatemi, R., Parvez, M. S. A., Zheng, C., & Hossain, M. G.  
714 (2022). Omicron variant of SARS-CoV-2: Genomics, transmissibility, and responses to  
715 current COVID-19 vaccines. *J Med Virol*, 94(5), 1825-1832.  
716 <https://doi.org/10.1002/jmv.27588>  
717 Barnes, C. O., Jette, C. A., Abernathy, M. E., Dam, K. A., Esswein, S. R., Gristick, H. B.,  
718 Malyutin, A. G., Sharaf, N. G., Huey-Tubman, K. E., Lee, Y. E., Robbiani, D. F.,  
719 Nussenzweig, M. C., West, A. P., Jr., & Bjorkman, P. J. (2020). SARS-CoV-2  
720 neutralizing antibody structures inform therapeutic strategies. *Nature*, 588(7839), 682-  
721 687. <https://doi.org/10.1038/s41586-020-2852-1>  
722 Barnes, C. O., West, A. P., Jr., Huey-Tubman, K. E., Hoffmann, M. A. G., Sharaf, N. G.,  
723 Hoffman, P. R., Koranda, N., Gristick, H. B., Gaebler, C., Muecksch, F., Lorenzi, J. C.  
724 C., Finkin, S., Hagglof, T., Hurley, A., Millard, K. G., Weisblum, Y., Schmidt, F.,  
725 Hatzioannou, T., Bieniasz, P. D., . . . Bjorkman, P. J. (2020). Structures of Human  
726 Antibodies Bound to SARS-CoV-2 Spike Reveal Common Epitopes and Recurrent  
727 Features of Antibodies. *Cell*, 182(4), 828-842 e816.  
728 <https://doi.org/10.1016/j.cell.2020.06.025>  
729 Cai, Y., Zhang, J., Xiao, T., Peng, H., Sterling, S. M., Walsh, R. M., Jr., Rawson, S., Rits-  
730 Volloch, S., & Chen, B. (2020). Distinct conformational states of SARS-CoV-2 spike  
731 protein. *Science*, 369(6511), 1586-1592. <https://doi.org/10.1126/science.abd4251>  
732 Chang, T. J., Yang, D. M., Wang, M. L., Liang, K. H., Tsai, P. H., Chiou, S. H., Lin, T. H., &  
733 Wang, C. T. (2020). Genomic analysis and comparative multiple sequences of SARS-  
734 CoV2. *J Chin Med Assoc*, 83(6), 537-543.  
735 <https://doi.org/10.1097/JCMA.0000000000000335>  
736 Corman, V. M., Muth, D., Niemeyer, D., & Drosten, C. (2018). Chapter Eight - Hosts and  
737 Sources of Endemic Human Coronaviruses. In M. Kielian, T. C. Mettenleiter, & M. J.  
738 Roossinck (Eds.), *Advances in Virus Research* (Vol. 100, pp. 163-188). Academic Press.  
739 <https://www.sciencedirect.com/science/article/pii/S0065352718300010>  
740 [files/788/S0065352718300010.html](https://www.sciencedirect.com/science/article/pii/S0065352718300010)  
741 Costello, S. M., Shoemaker, S. R., Hobbs, H. T., Nguyen, A. W., Hsieh, C.-L., Maynard, J. A.,  
742 McLellan, J. S., Pak, J. E., & Marqusee, S. (2022). The SARS-CoV-2 spike reversibly  
743 samples an open-trimer conformation exposing novel epitopes. *Nature Structural &*  
744 *Molecular Biology*, 29(3), 229-238. <https://doi.org/10.1038/s41594-022-00735-5>

- 745 Derking, R., & Sanders, R. W. (2021). Structure-guided envelope trimer design in HIV-1 vaccine  
746 development: a narrative review. *J Int AIDS Soc*, *24 Suppl 7*, e25797.  
747 <https://doi.org/10.1002/jia2.25797>
- 748 Duan, L., Zheng, Q., Zhang, H., Niu, Y., Lou, Y., & Wang, H. (2020). The SARS-CoV-2 Spike  
749 Glycoprotein Biosynthesis, Structure, Function, and Antigenicity: Implications for the  
750 Design of Spike-Based Vaccine Immunogens. *Front Immunol*, *11*, 576622.  
751 <https://doi.org/10.3389/fimmu.2020.576622>
- 752 Edwards, R. J., Mansouri, K., Stalls, V., Manne, K., Watts, B., Parks, R., Janowska, K., Gobeil,  
753 S. M. C., Kopp, M., Li, D., Lu, X., Mu, Z., Deyton, M., Oguin, T. H., Spreng, J.,  
754 Williams, W., Saunders, K. O., Montefiori, D., Sempowski, G. D., . . . Acharya, P.  
755 (2021). Cold sensitivity of the SARS-CoV-2 spike ectodomain. *Nature Structural &*  
756 *Molecular Biology*, *28*(2), 128-131. <https://doi.org/10.1038/s41594-020-00547-5>
- 757 Englander, S. W., & Kallenbach, N. R. (1983). Hydrogen exchange and structural dynamics of  
758 proteins and nucleic acids. *Q Rev Biophys*, *16*(4), 521-655.  
759 <https://doi.org/10.1017/s0033583500005217>
- 760 Gobeil, S. M., Janowska, K., McDowell, S., Mansouri, K., Parks, R., Manne, K., Stalls, V.,  
761 Kopp, M. F., Henderson, R., Edwards, R. J., Haynes, B. F., & Acharya, P. (2021).  
762 D614G Mutation Alters SARS-CoV-2 Spike Conformation and Enhances Protease  
763 Cleavage at the S1/S2 Junction. *Cell Rep*, *34*(2), 108630.  
764 <https://doi.org/10.1016/j.celrep.2020.108630>
- 765 Han, P., Li, L., Liu, S., Wang, Q., Zhang, D., Xu, Z., Han, P., Li, X., Peng, Q., Su, C., Huang, B.,  
766 Li, D., Zhang, R., Tian, M., Fu, L., Gao, Y., Zhao, X., Liu, K., Qi, J., . . . Wang, P.  
767 (2022). Receptor binding and complex structures of human ACE2 to spike RBD from  
768 omicron and delta SARS-CoV-2. *Cell*, *185*(4), 630-640.e610.  
769 <https://doi.org/10.1016/j.cell.2022.01.001>
- 770 Hodge, E. A., Benhaim, M. A., & Lee, K. K. (2020). Bridging protein structure, dynamics, and  
771 function using hydrogen/deuterium-exchange mass spectrometry. *Protein Sci*, *29*(4), 843-  
772 855. <https://doi.org/10.1002/pro.3790>
- 773 Hoofnagle, A. N., Resing, K. A., & Ahn, N. G. (2003). Protein analysis by hydrogen exchange  
774 mass spectrometry. *Annu Rev Biophys Biomol Struct*, *32*, 1-25.  
775 <https://doi.org/10.1146/annurev.biophys.32.110601.142417>
- 776 Hsieh, C.-L., Goldsmith, J. A., Schaub, J. M., DiVenere, A. M., Kuo, H.-C., Javanmardi, K., Le,  
777 K. C., Wrapp, D., Lee, A. G., Liu, Y., Chou, C.-W., Byrne, P. O., Hjorth, C. K., Johnson,  
778 N. V., Ludes-Meyers, J., Nguyen, A. W., Park, J., Wang, N., Amengor, D., . . . McLellan,  
779 J. S. (2020). Structure-based design of prefusion-stabilized SARS-CoV-2 spikes. *Science*,  
780 *369*(6510), 1501-1505. <https://doi.org/10.1126/science.abd0826>
- 781 Hsieh, S. M., Liu, M. C., Chen, Y. H., Lee, W. S., Hwang, S. J., Cheng, S. H., Ko, W. C.,  
782 Hwang, K. P., Wang, N. C., Lee, Y. L., Lin, Y. L., Shih, S. R., Huang, C. G., Liao, C. C.,  
783 Liang, J. J., Chang, C. S., Chen, C., Lien, C. E., Tai, I. C., & Lin, T. Y. (2021). Safety  
784 and immunogenicity of CpG 1018 and aluminium hydroxide-adjuvanted SARS-CoV-2 S-  
785 2P protein vaccine MVC-COV1901: interim results of a large-scale, double-blind,  
786 randomised, placebo-controlled phase 2 trial in Taiwan. *Lancet Respir Med*, *9*(12), 1396-  
787 1406. [https://doi.org/10.1016/S2213-2600\(21\)00402-1](https://doi.org/10.1016/S2213-2600(21)00402-1)
- 788 Kaltashov, I. A., & Eyles, S. J. (2002). Crossing the phase boundary to study protein dynamics  
789 and function: combination of amide hydrogen exchange in solution and ion fragmentation  
790 in the gas phase. *J Mass Spectrom*, *37*(6), 557-565. <https://doi.org/10.1002/jms.338>



- 791 Ke, Z., Oton, J., Qu, K., Cortese, M., Zila, V., McKeane, L., Nakane, T., Zivanov, J., Neufeldt,  
792 C. J., Cerikan, B., Lu, J. M., Peukes, J., Xiong, X., Krausslich, H. G., Scheres, S. H. W.,  
793 Bartenschlager, R., & Briggs, J. A. G. (2020). Structures and distributions of SARS-CoV-  
794 2 spike proteins on intact virions. *Nature*, *588*(7838), 498-502.  
795 <https://doi.org/10.1038/s41586-020-2665-2>
- 796 Kirchdoerfer, R. N., Wang, N., Pallesen, J., Wrapp, D., Turner, H. L., Cottrell, C. A., Corbett, K.  
797 S., Graham, B. S., McLellan, J. S., & Ward, A. B. (2018). Publisher Correction:  
798 Stabilized coronavirus spikes are resistant to conformational changes induced by receptor  
799 recognition or proteolysis. *Sci Rep*, *8*(1), 17823. [https://doi.org/10.1038/s41598-018-  
800 36918-8](https://doi.org/10.1038/s41598-018-36918-8)
- 801 Lan, J., Ge, J., Yu, J., Shan, S., Zhou, H., Fan, S., Zhang, Q., Shi, X., Wang, Q., Zhang, L., &  
802 Wang, X. (2020). Structure of the SARS-CoV-2 spike receptor-binding domain bound to  
803 the ACE2 receptor. *Nature*, *581*(7807), 215-220. [https://doi.org/10.1038/s41586-020-  
804 2180-5](https://doi.org/10.1038/s41586-020-2180-5)
- 805 Lau, A. M., Claesen, J., Hansen, K., & Politis, A. (2021). Deuterios 2.0: peptide-level  
806 significance testing of data from hydrogen deuterium exchange mass spectrometry.  
807 *Bioinformatics*, *37*(2), 270-272. <https://doi.org/10.1093/bioinformatics/btaa677>
- 808 Lien, C. E., Kuo, T. Y., Lin, Y. J., Lian, W. C., Lin, M. Y., Liu, L. T., Cheng, J., Chou, Y. C., &  
809 Chen, C. (2021). Evaluating the Neutralizing Ability of a CpG-Adjuvanted S-2P Subunit  
810 Vaccine Against Severe Acute Respiratory Syndrome Coronavirus 2 (SARS-CoV-2)  
811 Variants of Concern. *Clin Infect Dis*. <https://doi.org/10.1093/cid/ciab711>
- 812 Lien, C. E., Lin, Y. J., Chen, C., Lian, W. C., Kuo, T. Y., Campbell, J. D., Traquina, P., Lin, M.  
813 Y., Liu, L. T., Chuang, Y. S., Ko, H. Y., Liao, C. C., Chen, Y. H., Jan, J. T., Ma, H. H.,  
814 Sun, C. P., Lin, Y. S., Wu, P. Y., Wang, Y. C., . . . Lin, Y. L. (2021). CpG-adjuvanted  
815 stable prefusion SARS-CoV-2 spike protein protected hamsters from SARS-CoV-2  
816 challenge. *Sci Rep*, *11*(1), 8761. <https://doi.org/10.1038/s41598-021-88283-8>
- 817 Lim, X.-X., Chandramohan, A., Lim, X.-Y. E., Crowe, J. E., Lok, S.-M., & Anand, G. S. (2017).  
818 Epitope and Paratope Mapping Reveals Temperature-Dependent Alterations in the  
819 Dengue-Antibody Interface. *Structure*, *25*(9), 1391-1402.e1393.  
820 <https://doi.org/10.1016/j.str.2017.07.007>
- 821 Lim, X. X., Chandramohan, A., Lim, X. Y., Bag, N., Sharma, K. K., Wirawan, M., Wohland, T.,  
822 Lok, S. M., & Anand, G. S. (2017). Conformational changes in intact dengue virus reveal  
823 serotype-specific expansion. *Nat Commun*, *8*, 14339.  
824 <https://doi.org/10.1038/ncomms14339>
- 825 Liu, L., Iketani, S., Guo, Y., Chan, J. F. W., Wang, M., Liu, L., Luo, Y., Chu, H., Huang, Y.,  
826 Nair, M. S., Yu, J., Chik, K. K. H., Yuen, T. T. T., Yoon, C., To, K. K. W., Chen, H.,  
827 Yin, M. T., Sobieszczyk, M. E., Huang, Y., . . . Ho, D. D. (2022). Striking antibody  
828 evasion manifested by the Omicron variant of SARS-CoV-2. *Nature*, *602*(7898), 676-  
829 681. <https://doi.org/10.1038/s41586-021-04388-0>
- 830 Liu, Y., Liu, J., Johnson, B. A., Xia, H., Ku, Z., Schindewolf, C., Widen, S. G., An, Z., Weaver,  
831 S. C., Menachery, V. D., Xie, X., & Shi, P.-Y. (2022). Delta spike P681R mutation  
832 enhances SARS-CoV-2 fitness over Alpha variant. *Cell Reports*, 110829.  
833 <https://doi.org/10.1016/j.celrep.2022.110829>
- 834 Martinez-Flores, D., Zepeda-Cervantes, J., Cruz-Resendiz, A., Aguirre-Sampieri, S., Sampieri,  
835 A., & Vaca, L. (2021). SARS-CoV-2 Vaccines Based on the Spike Glycoprotein and

- 836 Implications of New Viral Variants. *Frontiers in Immunology*, 12. <https://doi.org/ARTN>  
837 701501
- 838 10.3389/fimmu.2021.701501
- 839 Narang, D., James, D. A., Balmer, M. T., & Wilson, D. J. (2021). Protein Footprinting,  
840 Conformational Dynamics, and Core Interface-Adjacent Neutralization “Hotspots” in the  
841 SARS-CoV-2 Spike Protein Receptor Binding Domain/Human ACE2 Interaction.  
842 *Journal of the American Society for Mass Spectrometry*, 32(7), 1593-1600.  
843 <https://doi.org/10.1021/jasms.0c00465>
- 844 Oganessian, I., Lento, C., & Wilson, D. J. (2018). Contemporary hydrogen deuterium exchange  
845 mass spectrometry. *Methods*, 144, 27-42. <https://doi.org/10.1016/j.ymeth.2018.04.023>
- 846 Ozono, S., Zhang, Y., Ode, H., Sano, K., Tan, T. S., Imai, K., Miyoshi, K., Kishigami, S., Ueno,  
847 T., Iwatani, Y., Suzuki, T., & Tokunaga, K. (2021). SARS-CoV-2 D614G spike mutation  
848 increases entry efficiency with enhanced ACE2-binding affinity. *Nature*  
849 *Communications*, 12(1), 848. <https://doi.org/10.1038/s41467-021-21118-2>
- 850 Pallesen, J., Wang, N., Corbett, K. S., Wrapp, D., Kirchdoerfer, R. N., Turner, H. L., Cottrell, C.  
851 A., Becker, M. M., Wang, L., Shi, W., Kong, W. P., Andres, E. L., Kettenbach, A. N.,  
852 Denison, M. R., Chappell, J. D., Graham, B. S., Ward, A. B., & McLellan, J. S. (2017).  
853 Immunogenicity and structures of a rationally designed prefusion MERS-CoV spike  
854 antigen. *Proc Natl Acad Sci U S A*, 114(35), E7348-E7357.  
855 <https://doi.org/10.1073/pnas.1707304114>
- 856 Pandey, U., Yee, R., Shen, L., Judkins, A. R., Bootwalla, M., Ryutov, A., Maglinte, D. T.,  
857 Ostrow, D., Precit, M., Biegel, J. A., Bender, J. M., Gai, X., & Dien Bard, J. (2021). High  
858 Prevalence of SARS-CoV-2 Genetic Variation and D614G Mutation in Pediatric Patients  
859 With COVID-19. *Open Forum Infect Dis*, 8(6), ofaa551.  
860 <https://doi.org/10.1093/ofid/ofaa551>
- 861 Peacock, R. B., Davis, J. R., Markwick, P. R. L., & Komives, E. A. (2018). Dynamic  
862 Consequences of Mutation of Tryptophan 215 in Thrombin. *Biochemistry*, 57(18), 2694-  
863 2703. <https://doi.org/10.1021/acs.biochem.8b00262>
- 864 Peacock, T. P., Goldhill, D. H., Zhou, J., Baillon, L., Frise, R., Swann, O. C., Kugathasan, R.,  
865 Penn, R., Brown, J. C., Sanchez-David, R. Y., Braga, L., Williamson, M. K., Hassard, J.  
866 A., Staller, E., Hanley, B., Osborn, M., Giacca, M., Davidson, A. D., Matthews, D. A., &  
867 Barclay, W. S. (2021). The furin cleavage site in the SARS-CoV-2 spike protein is  
868 required for transmission in ferrets. *Nat Microbiol*, 6(7), 899-909.  
869 <https://doi.org/10.1038/s41564-021-00908-w>
- 870 Plante, J. A., Liu, Y., Liu, J., Xia, H., Johnson, B. A., Lokugamage, K. G., Zhang, X., Muruato,  
871 A. E., Zou, J., Fontes-Garfias, C. R., Mirchandani, D., Scharton, D., Bilello, J. P., Ku, Z.,  
872 An, Z., Kalveram, B., Freiberg, A. N., Menachery, V. D., Xie, X., . . . Shi, P. Y. (2021).  
873 Spike mutation D614G alters SARS-CoV-2 fitness. *Nature*, 592(7852), 116-121.  
874 <https://doi.org/10.1038/s41586-020-2895-3>
- 875 Privalov, P. L. (1990). Cold denaturation of proteins. *Crit Rev Biochem Mol Biol*, 25(4), 281-  
876 305. <https://doi.org/10.3109/10409239009090612>
- 877 Qing, E., Kicmal, T., Kumar, B., Hawkins, G. M., Timm, E., Perlman, S., & Gallagher, T.  
878 (2021). Dynamics of SARS-CoV-2 Spike Proteins in Cell Entry: Control Elements in the  
879 Amino-Terminal Domains. *mBio*, 12(4), e0159021. [https://doi.org/10.1128/mBio.01590-](https://doi.org/10.1128/mBio.01590-21)  
880 [21](https://doi.org/10.1128/mBio.01590-21)



- 881 Raghuvasi, P. V., Tulsian, N. K., Samsudin, F., Qian, X., Purushotorman, K., Yue, G., Kozma,  
882 M. M., Hwa, W. Y., Lescar, J., Bond, P. J., MacAry, P. A., & Anand, G. S. (2021).  
883 SARS-CoV-2 S protein:ACE2 interaction reveals novel allosteric targets. *Elife*, *10*.  
884 <https://doi.org/10.7554/eLife.63646>
- 885 Saito, A., Irie, T., Suzuki, R., Maemura, T., Nasser, H., Uriu, K., Kosugi, Y., Shirakawa, K.,  
886 Sadamasu, K., Kimura, I., Ito, J., Wu, J., Iwatsuki-Horimoto, K., Ito, M., Yamayoshi, S.,  
887 Ozono, S., Butlertanaka, E. P., Tanaka, Y. L., Shimizu, R., . . . Sato, K. (2021). *SARS-*  
888 *CoV-2 spike P681R mutation, a hallmark of the Delta variant, enhances viral*  
889 *fusogenicity and pathogenicity*.  
890 <https://www.biorxiv.org/content/10.1101/2021.06.17.448820v2>  
891 files/781/2021.06.17.448820v2.html
- 892 Shang, J., Wan, Y., Luo, C., Ye, G., Geng, Q., Auerbach, A., & Li, F. (2020). Cell entry  
893 mechanisms of SARS-CoV-2. *Proc Natl Acad Sci U S A*, *117*(21), 11727-11734.  
894 <https://doi.org/10.1073/pnas.2003138117>
- 895 Tian, D., Sun, Y., Zhou, J., & Ye, Q. (2021). The Global Epidemic of the SARS-CoV-2 Delta  
896 Variant, Key Spike Mutations and Immune Escape. *Frontiers in Immunology*, *12*,  
897 751778. <https://doi.org/10.3389/fimmu.2021.751778>
- 898 Ulrich, L., Halwe, N. J., Taddeo, A., Ebert, N., Schon, J., Devisme, C., Trueb, B. S., Hoffmann,  
899 B., Wider, M., Fan, X., Bekliz, M., Essaidi-Laziosi, M., Schmidt, M. L., Niemeyer, D.,  
900 Corman, V. M., Kraft, A., Godel, A., Laloli, L., Kelly, J. N., . . . Benarafa, C. (2022).  
901 Enhanced fitness of SARS-CoV-2 variant of concern Alpha but not Beta. *Nature*,  
902 *602*(7896), 307-313. <https://doi.org/10.1038/s41586-021-04342-0>
- 903 Vankadari, N. (2020). Structure of Furin Protease Binding to SARS-CoV-2 Spike Glycoprotein  
904 and Implications for Potential Targets and Virulence. *J Phys Chem Lett*, *11*(16), 6655-  
905 6663. <https://doi.org/10.1021/acs.jpcclett.0c01698>
- 906 Walls, A. C., Park, Y. J., Tortorici, M. A., Wall, A., McGuire, A. T., & Velesler, D. (2020).  
907 Structure, Function, and Antigenicity of the SARS-CoV-2 Spike Glycoprotein. *Cell*,  
908 *183*(6), 1735. <https://doi.org/10.1016/j.cell.2020.11.032>
- 909 Wassenaar, T. M., Wanchai, V., Buzard, G., & Ussery, D. W. (2022). The first three waves of  
910 the Covid-19 pandemic hint at a limited genetic repertoire for SARS-CoV-2. *FEMS*  
911 *Microbiol Rev*, *46*(3). <https://doi.org/10.1093/femsre/fuac003>
- 912 Watanabe, Y., Allen, J. D., Wrapp, D., McLellan, J. S., & Crispin, M. (2020). Site-specific  
913 glycan analysis of the SARS-CoV-2 spike. *Science*, *369*(6501), 330-333.  
914 <https://doi.org/10.1126/science.abb9983>
- 915 Weis, D. D., Wales, T. E., Engen, J. R., Hotchko, M., & Ten Eyck, L. F. (2006). Identification  
916 and characterization of EX1 kinetics in H/D exchange mass spectrometry by peak width  
917 analysis. *J Am Soc Mass Spectrom*, *17*(11), 1498-1509.  
918 <https://doi.org/10.1016/j.jasms.2006.05.014>
- 919 Xia, S., Wen, Z., Wang, L., Lan, Q., Jiao, F., Tai, L., Wang, Q., Sun, F., Jiang, S., Lu, L., & Zhu,  
920 Y. (2021). Structure-based evidence for the enhanced transmissibility of the dominant  
921 SARS-CoV-2 B.1.1.7 variant (Alpha). *Cell Discovery*, *7*(1), 1-5.  
922 <https://doi.org/10.1038/s41421-021-00349-z>
- 923 Zhang, J., Cai, Y., Xiao, T., Lu, J., Peng, H., Sterling, S. M., Walsh, R. M., Jr., Rits-Volloch, S.,  
924 Zhu, H., Woosley, A. N., Yang, W., Sliz, P., & Chen, B. (2021). Structural impact on  
925 SARS-CoV-2 spike protein by D614G substitution. *Science*, *372*(6541), 525-530.  
926 <https://doi.org/10.1126/science.abf2303>

927 **Figure 2-figure supplement 1.**

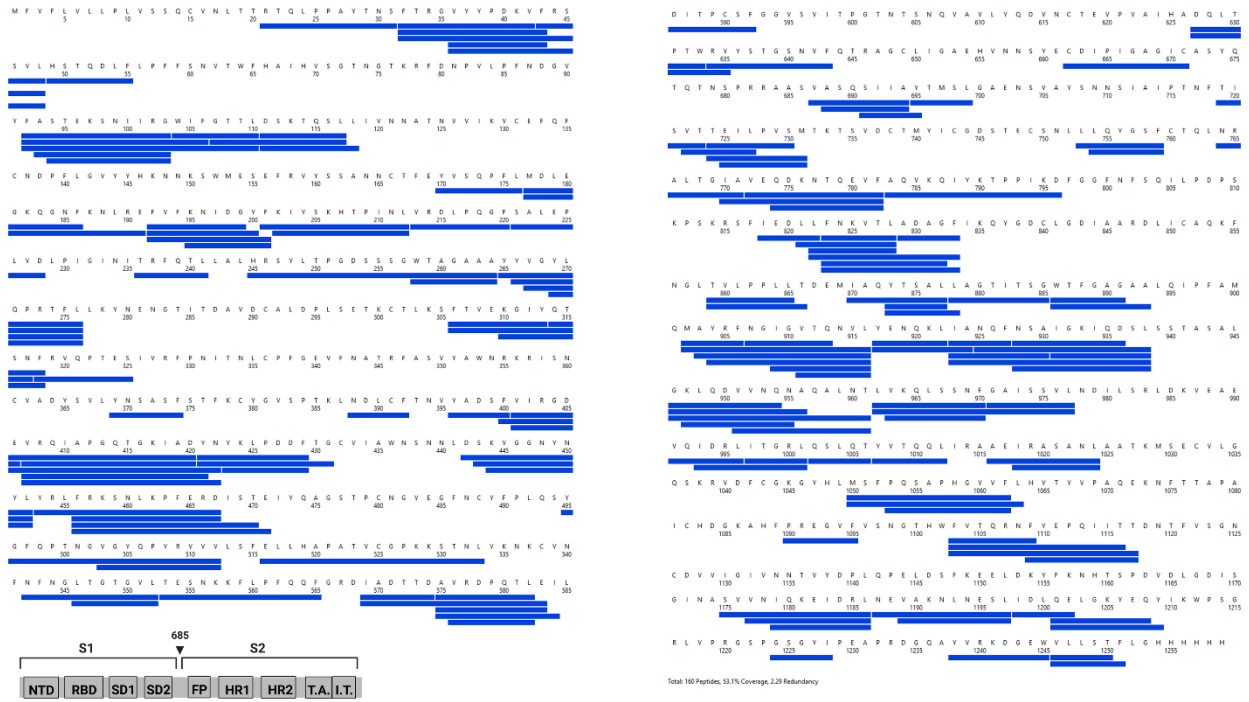

928 **Primary sequence coverage for wildtype S 2P versus 6P comparison.** Coverage map of  
 929 wildtype 2P S compared to 6P S using the wildtype 2P sequence showing 160 peptides spanning  
 930 53.1% of the S protein. The domain organization of S is also shown.  
 931  
 932

933 **Figure 2-figure supplement 2.**

934

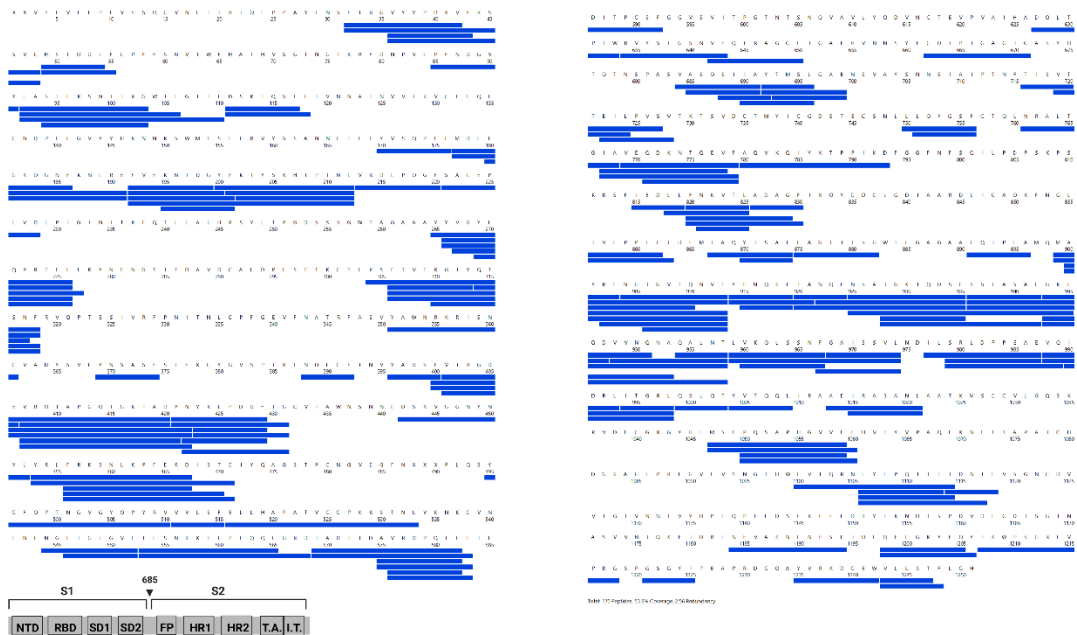

935

936

937

938

939

940

**Primary sequence coverage for wildtype S incubated at 37°C versus unincubated wildtype S comparison.** Coverage map of wildtype S incubated at 37°C compared to unincubated wildtype S using the wildtype 2P sequence showing 170 peptides spanning 53.3% of the S protein. The domain organization of S is also shown.

941 **Figure 2-figure supplement 3.**

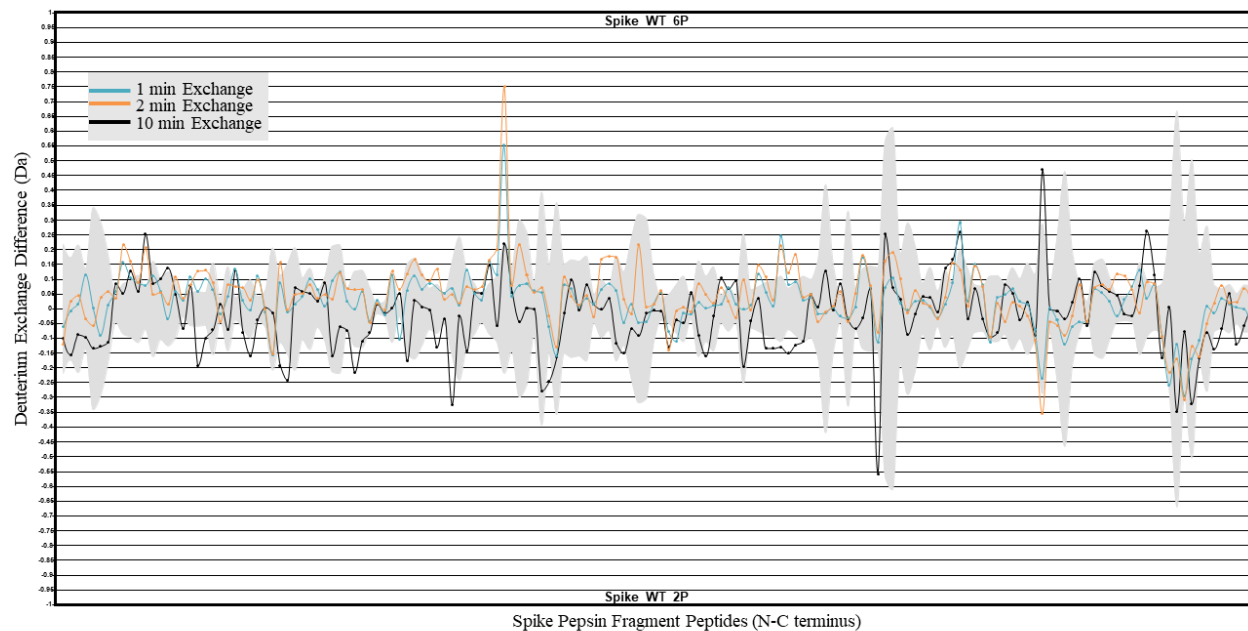

942  
943 **HDXMS analysis of 2P and 6P S constructs.** Difference plot of Wildtype 6P S minus Wildtype  
944 2P S for peptides N to C terminus. Differences for 1, 2, and 10 min exchange are shown in blue,  
945 orange, and black respectively. The grey trace denotes standard errors of deuterium exchange for  
946 each peptide.  
947  
948

949 **Figure 2-figure supplement 4.**

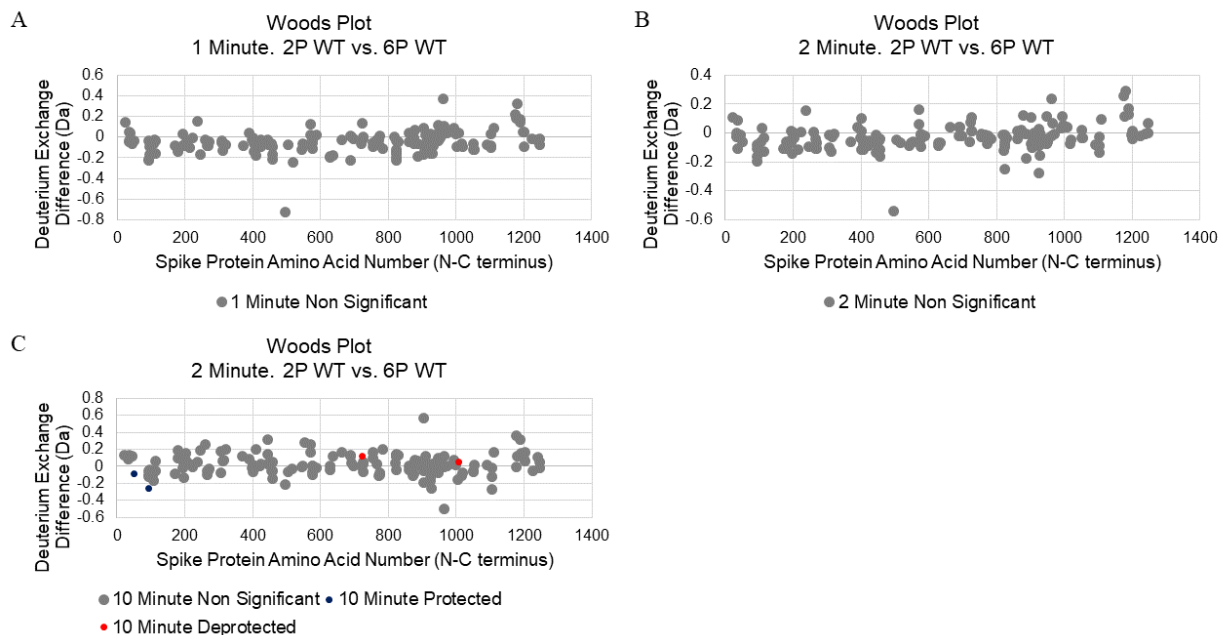

950  
951 **Woods plot analysis of Wildtype 2P versus 6P S.** Woods plots for 1 min (A), 2 min (B), and  
952 significantly protected (blue) or deprotected (red) peptides were identified  
953 using a peptide level significance test and a P value <0.01.  
954

955  
956  
957

958 **Figure 2-figure supplement 5.**

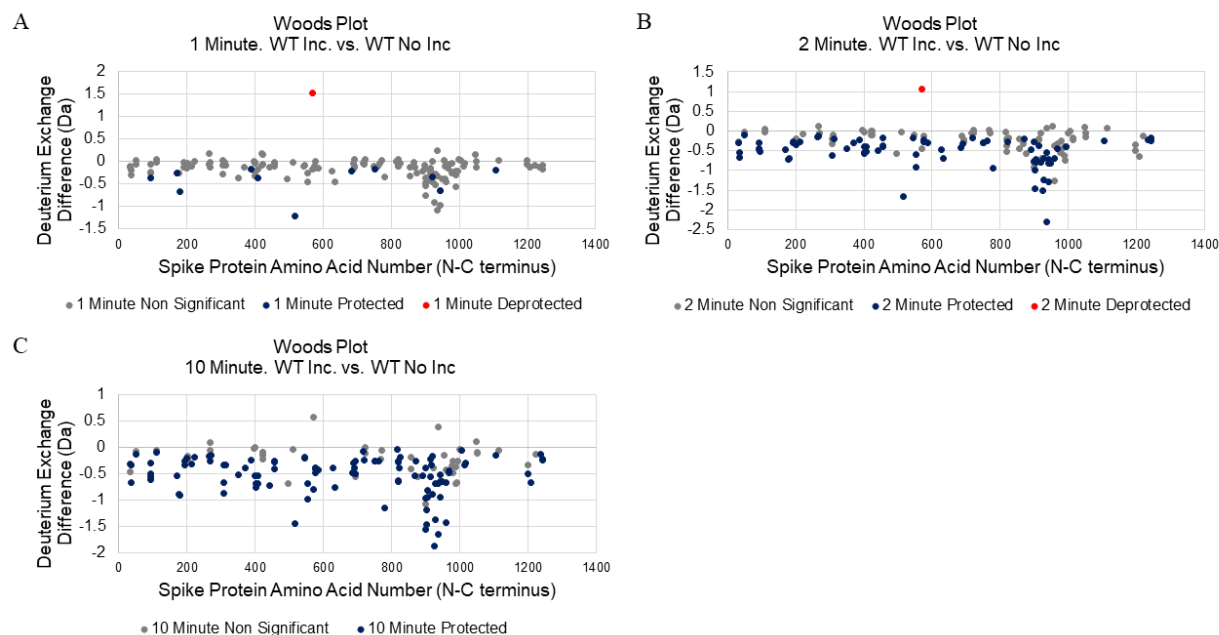

959  
960  
961  
962  
963  
964  
965

**Woods plot analysis of wildtype S incubated at 37°C versus unincubated wildtype S.** Woods plots for 1 min (A), 2 min (B), and 10 min (C) exchange. Significantly protected (blue) or deprotected (red) peptides were identified using a peptide level significance test and a P value <0.01.



966 **Figure 3-figure supplement 1.**

967

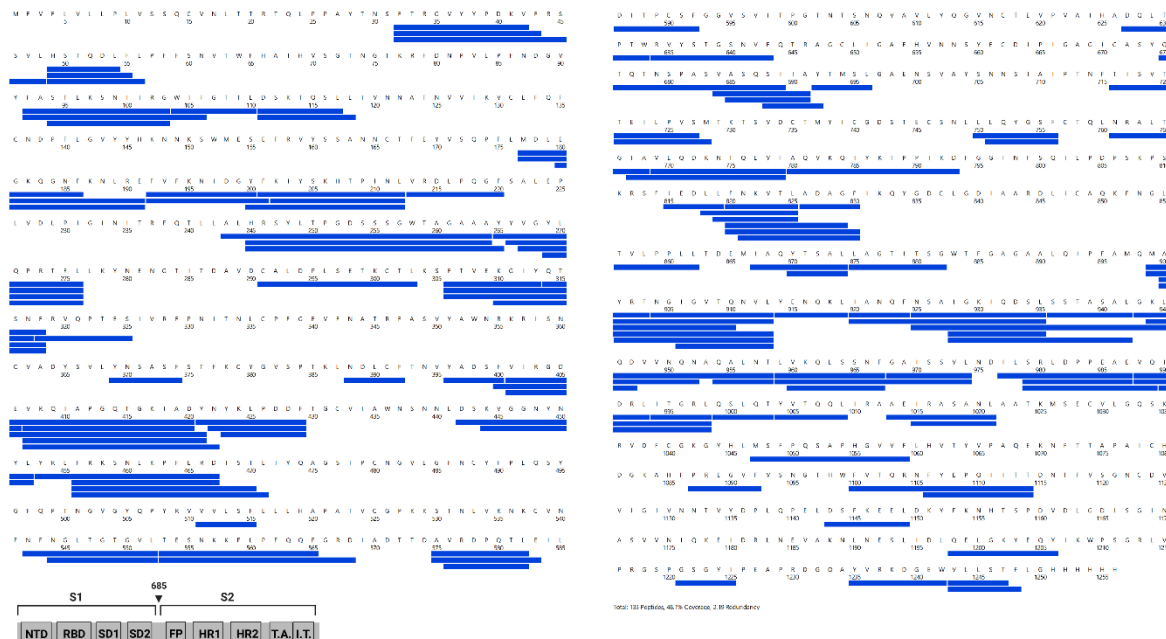

968

969

970

971

972

**Primary sequence coverage for D614G S versus wildtype S comparison.** Coverage map of D614G S compared to wildtype S using the Wildtype 2P sequence showing 132 peptides spanning 47.3% of the S protein. The domain organization of S is also shown.

973 **Figure 3-figure supplement 2.**

974

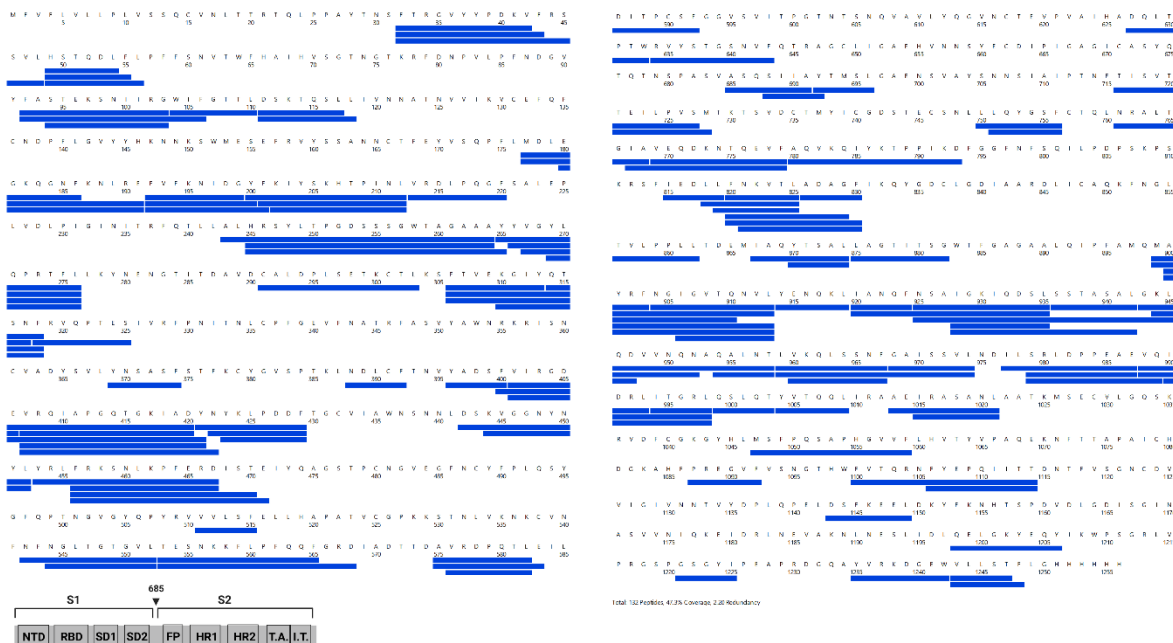

981 **Figure 3-figure supplement 3**

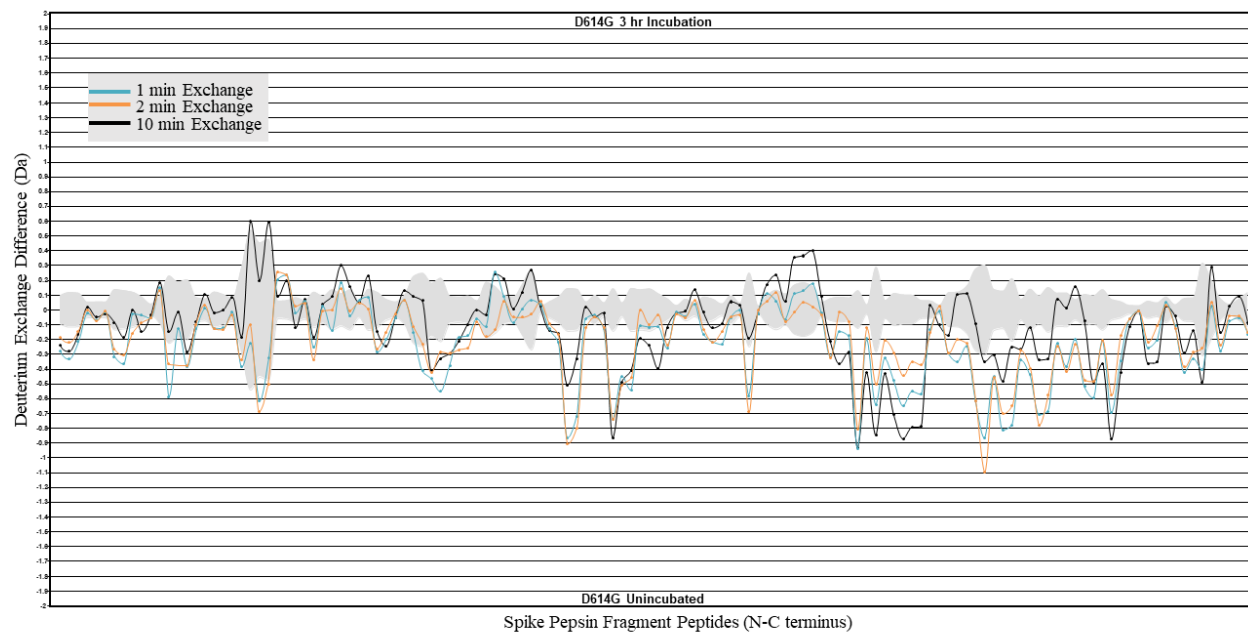

982  
983 **HDXMS analysis of incubation effects on D614G S.** Difference plot of D614G S incubated for  
984 3 h at 37 °C minus D614G S with no incubation for peptides N to C terminus. Differences for 1,  
985 2, and 10 min exchange are shown in blue, orange, and black respectively. The grey trace  
986 denotes standard errors of deuterium exchange for each peptide.  
987  
988

989 **Figure 3-figure supplement 4**

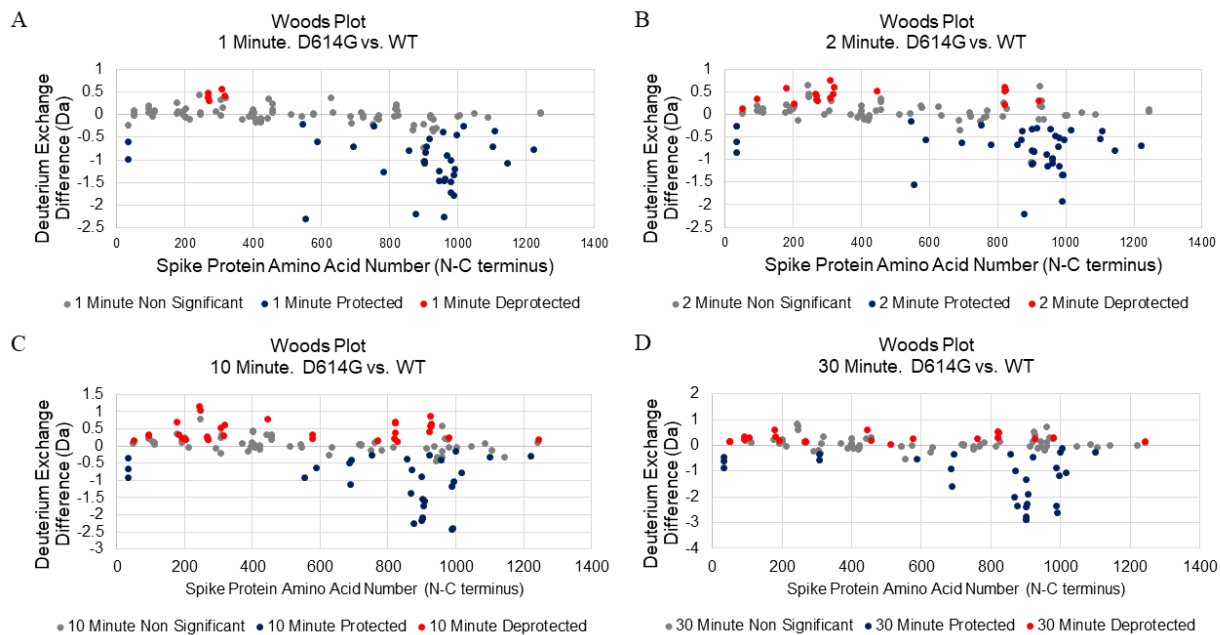

990  
991

992 **Woods plot analysis of D614G S versus Wildtype S.** Woods plots for 1 min (A), 2 min (B), 10  
993 min (C), and 30 min (D) exchange. Significantly protected (blue) or deprotected (red) peptides  
994 were identified using a peptide level significance test and a P value <0.01.

995

996 **Figure 3-figure supplement 5.**

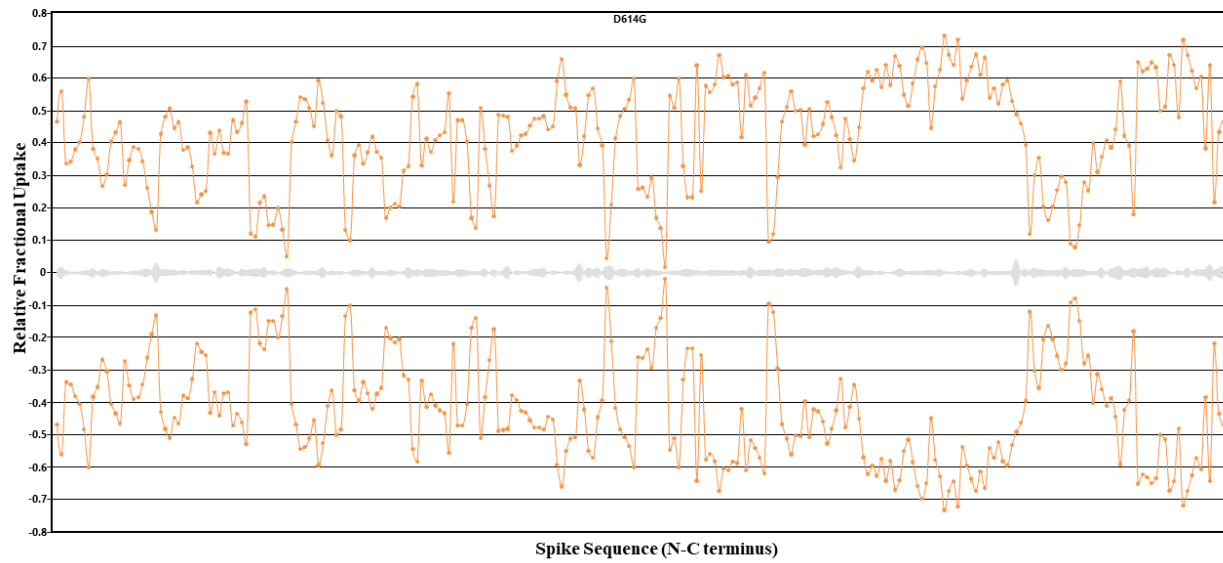

997  
998  
999  
1000  
1001  
1002

**Back exchange measurements for pepsin fragment peptides from D614G S.** Deuterium exchange in peptides after long deuteration (Dex = 24 h) is displayed as an RFU plot. The highest exchanging peptides (943-958 and 957-967) were used to calculate an average back exchange estimate of 20%.





1010 **Figure 4-figure supplement 2.**

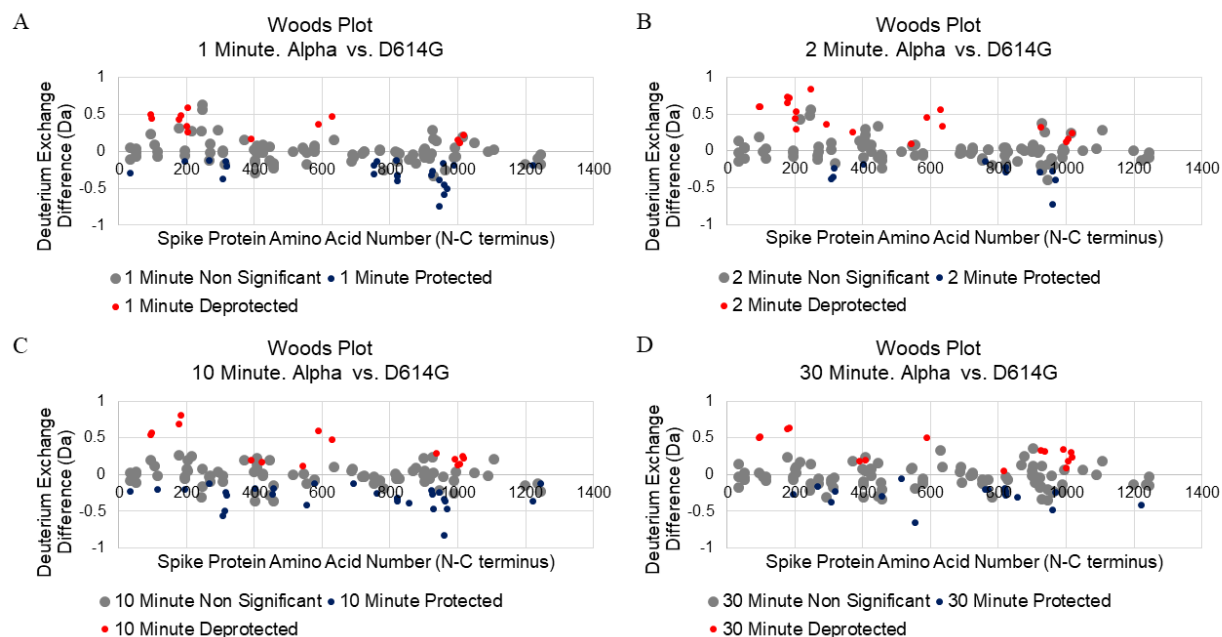

1011  
1012  
1013  
1014  
1015  
1016

**Woods plot analysis of Alpha variant S versus D614G S.** Woods plots for 1 min (A), 2 min (B), 10 min (C), and 30 min (D) exchange. Significantly protected (blue) or deprotected (red) peptides were identified using a peptide level significance test and a P value <0.01.

1017 **Figure 5-figure supplement 1.**

1018

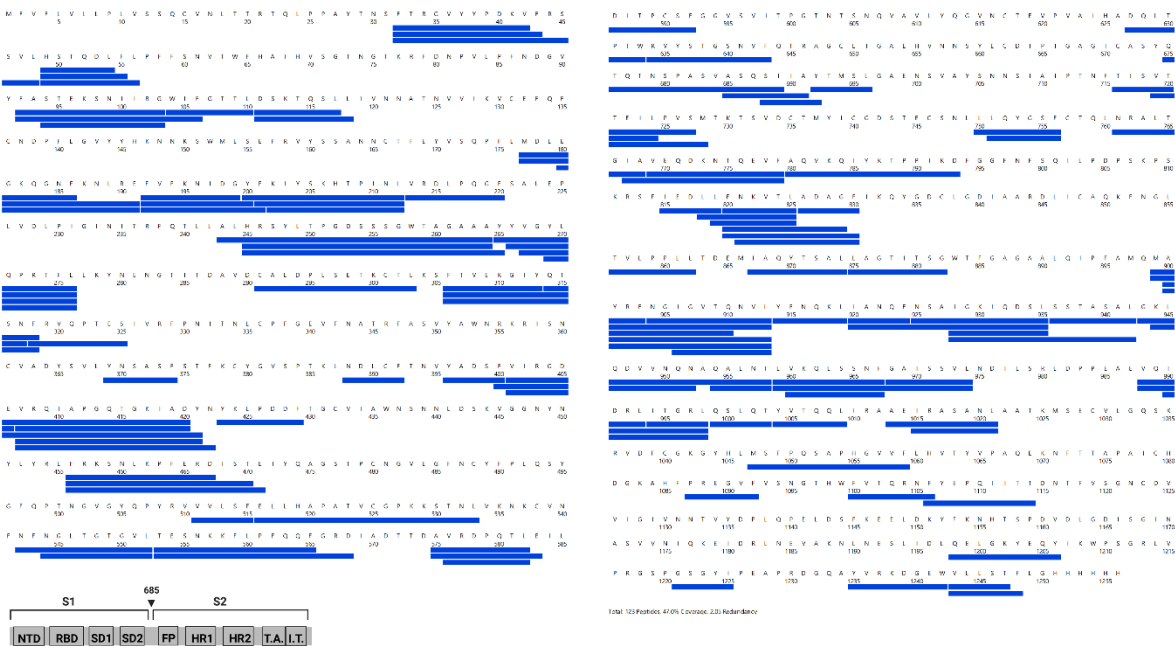

Total: 123 Peptides, 47.0% Coverage, 2.33 Redundancy

1019

1020

1021

1022

1023

**Primary sequence coverage for Delta S versus Alpha S comparison.** Coverage map of Delta S compared to Alpha S using the D614G 2P sequence showing 123 peptides spanning 47.0% of the S protein. The domain organization of S is also shown.

1024 **Figure 5-figure supplement 2.**

1025

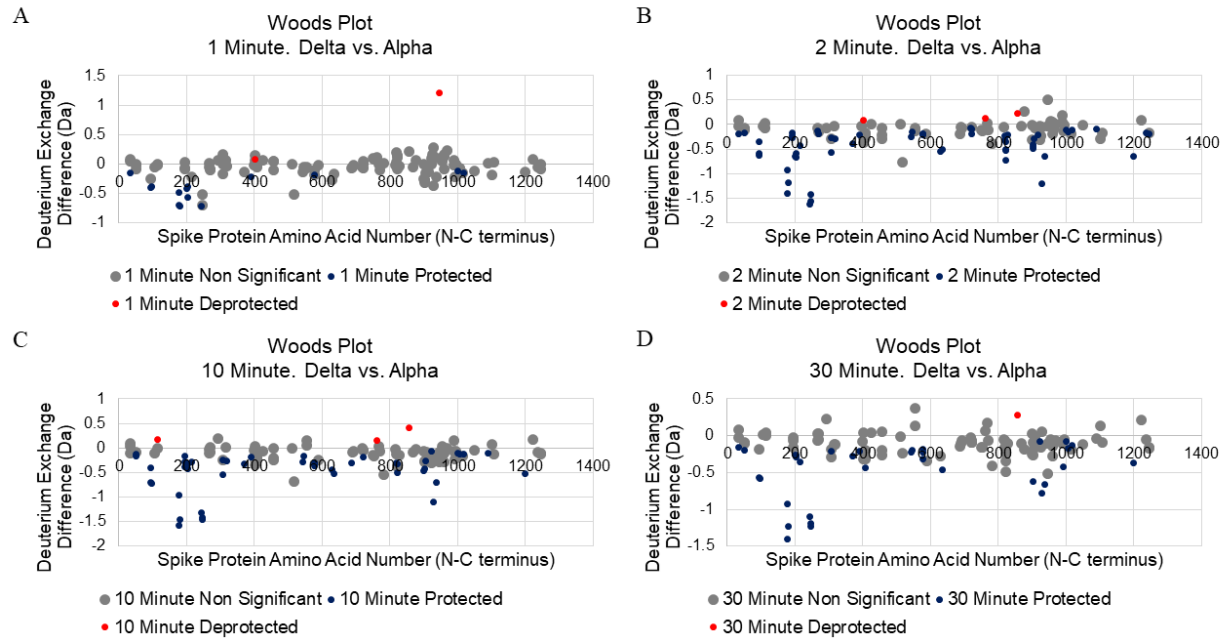

1026

1027

1028 **Woods plot analysis of Delta variant S versus Alpha variant S.** Woods plots for 1 min (A), 2  
1029 min (B), 10 min (C), and 30 min (D) exchange. Significantly protected (blue) or deprotected  
1030 (red) peptides were identified using a peptide level significance test and a P value <0.01.  
1031

1032 **Figure 6-figure supplement 1.**  
 1033

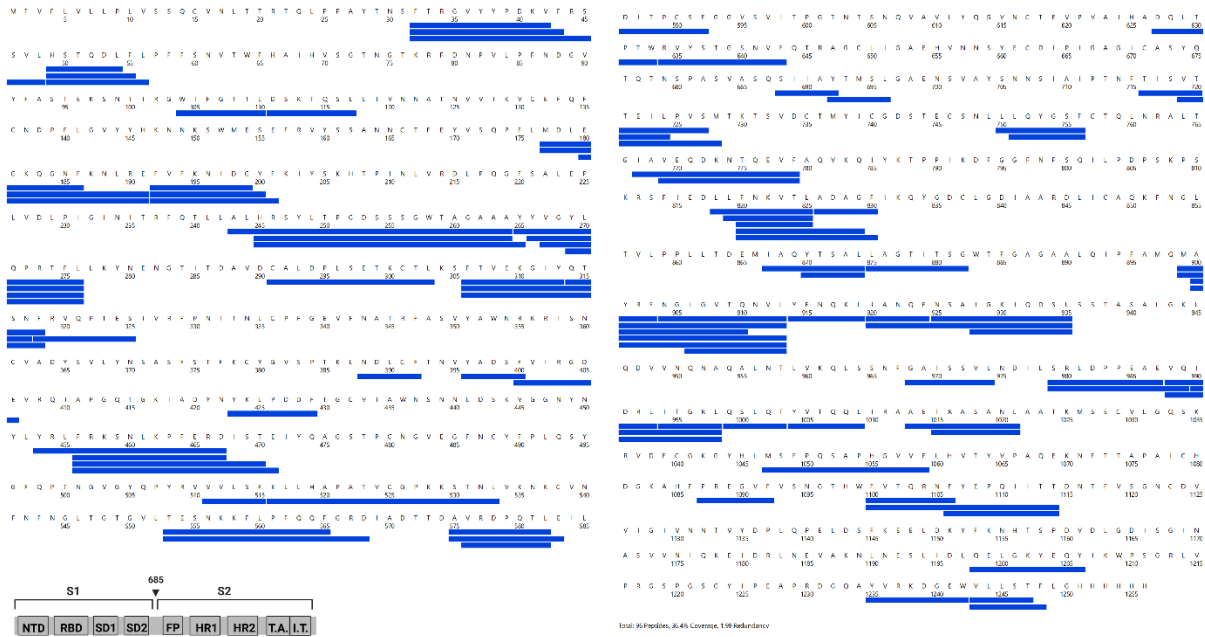

**Primary sequence coverage for Omicron S versus Delta S comparison.** Coverage map of Omicron S compared to Delta S using the D614G 2P sequence showing 96 peptides spanning 36.4% of the S protein. The domain organization of S is also shown.

1039 **Figure 6-figure supplement 2.**

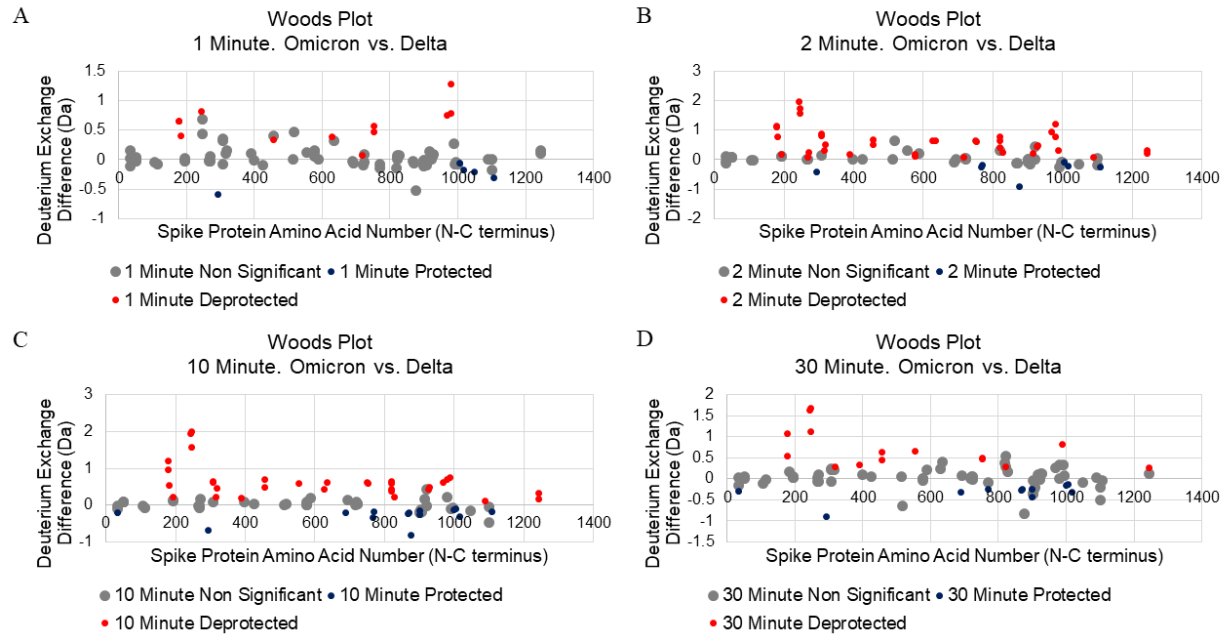

1040

1041

1042 **Woods plot analysis of Omicron variant S versus Delta variant S.** Woods plots for 1 min (A),  
1043 significantly protected (blue) or deprotected (red) peptides were identified using a peptide level significance test and a P value <0.01.  
1044  
1045

1046 **Figure 7-figure supplement 1.**

1047

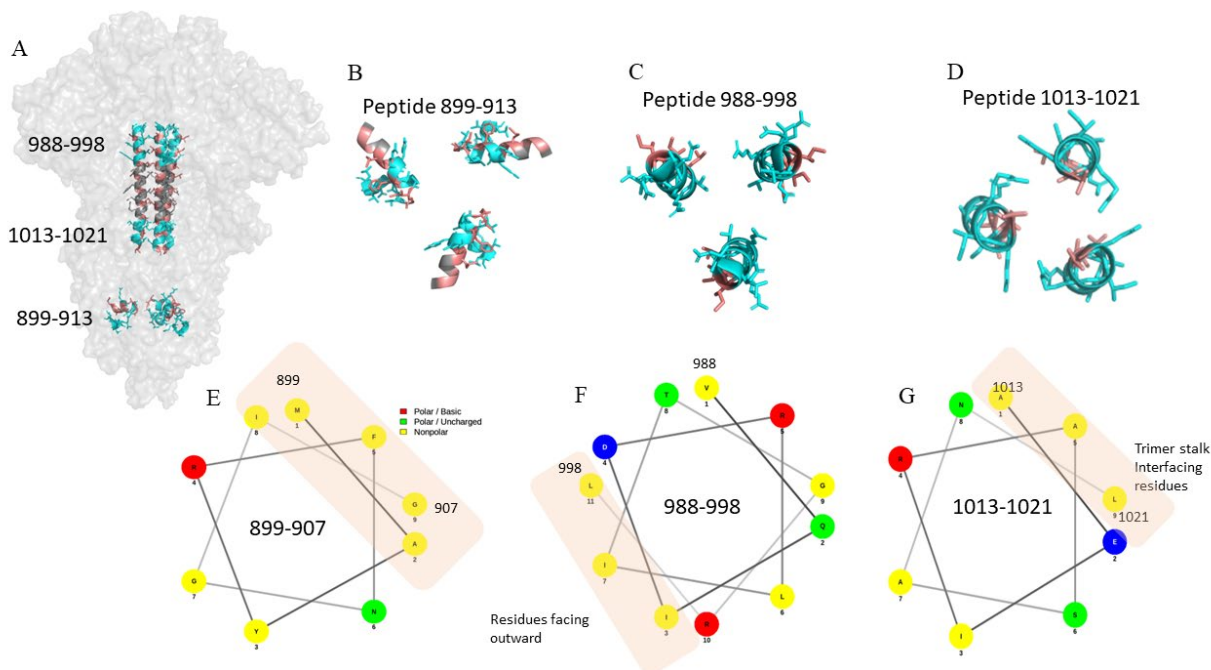

1048

1049

1050 **Hydrophobic interactions maintain trimer core at the stalk region** (A) Structure of the S  
1051 trimer highlighting stalk region in salmon (PDB ID: 6VXX). HDXMS analysis peptides at the  
1052 top, middle and bottom of the trimer stalk are colored cyan. (B, C, D) Cross-sectional view of  
1053 peptides in the S trimer stalk are colored cyan. Hydrophobic residues are colored salmon. (E, F,  
1054 G) Helical wheel representation of peptides classifying residues based on polarity. Hydrophobic  
1055 patches are shown by orange rectangle.  
1056



1057 **Figure 7-figure supplement 2.**

1058

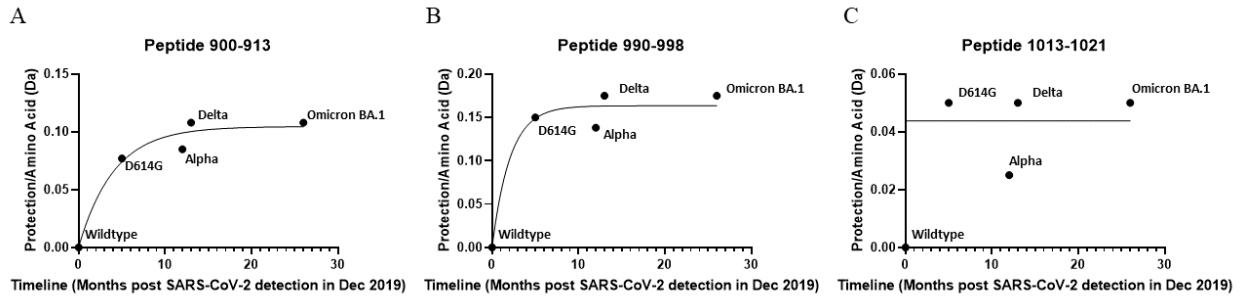

1059

1060

1061

1062

1063

1064

1065

**Plot of protection in S trimer stalk peptides as function of timeline of emergence.** Protection for each peptide was determined by subtracting deuterium uptake for each variant from wildtype and normalizing to the number of exchangeable amino acids. Protection is plotted against months after the first identification of SARS-CoV-2 in Dec. 2019 and curves fit to a one phase association (Graphpad Prism 3.0, San Diego CA).

1066 **Table S1.**

1067

|       | Wildtype                          |                                    | D614G                             |                                    | Delta                             |                                    | Omicron                           |                                    |
|-------|-----------------------------------|------------------------------------|-----------------------------------|------------------------------------|-----------------------------------|------------------------------------|-----------------------------------|------------------------------------|
|       | Number of unique glycans detected | Example Glycan                     | Number of unique glycans detected | Example Glycan                     | Number of unique glycans detected | Example Glycan                     | Number of unique glycans detected | Example Glycan                     |
| N17   | 2                                 | HexNAc(4)Hex(6)Fuc(1)NeuAc(1)      | 3                                 | HexNAc(4)Hex(6)NeuAc(1)            | 0                                 | N/A                                | 2                                 | HexNAc(5)Hex(4)                    |
| N61   | 40                                | HexNAc(4)Hex(5)Fuc(1)NeuAc(1)      | 25                                | HexNAc(4)Hex(5)NeuAc(2)Na(2)       | 30                                | HexNAc(5)Hex(6)NeuAc(1)            | 12                                | HexNAc(6)Hex(3)Fuc(1)NeuAc(2)      |
| N74   | 43                                | HexNAc(6)Hex(5)Fuc(1)NeuAc(1)      | 41                                | HexNAc(4)Hex(5)Fuc(1)NeuAc(2)      | 40                                | HexNAc(6)Hex(5)Fuc(1)NeuAc(1)      | 9                                 | HexNAc(4)Hex(5)Fuc(1)              |
| N122  | 42                                | HexNAc(4)Hex(5)Fuc(1)NeuAc(2)Na(1) | 41                                | HexNAc(3)Hex(6)Fuc(1)NeuAc(1)      | 36                                | HexNAc(3)Hex(4)NeuAc(1)            | 39                                | HexNAc(4)Hex(5)Fuc(1)NeuAc(2)Na(2) |
| N149  | 2                                 | HexNAc(2)Hex(5)                    | 2                                 | HexNAc(4)Hex(5)Fuc(1)NeuAc(2)Na(1) | 23                                | HexNAc(3)Hex(6)Fuc(1)NeuAc(1)      | 0                                 | N/A                                |
| N165  | 6                                 | HexNAc(4)Hex(4)NeuAc(1)Na(1)       | 7                                 | HexNAc(4)Hex(4)NeuAc(1)Na(1)       | 25                                | HexNAc(4)Hex(6)Fuc(1)NeuAc(1)Na(1) | 8                                 | HexNAc(4)Hex(4)NeuAc(1)Na(1)       |
| N234  | 33                                | HexNAc(4)Hex(6)Fuc(1)NeuAc(1)Na(1) | 29                                | HexNAc(4)Hex(6)Fuc(1)NeuAc(1)      | 27                                | HexNAc(4)Hex(5)NeuAc(2)Na(2)       | 18                                | HexNAc(4)Hex(6)Fuc(1)NeuAc(1)      |
| N282  | 7                                 | HexNAc(6)Hex(3)Fuc(1)NeuAc(2)      | 17                                | HexNAc(4)Hex(5)Fuc(1)NeuAc(1)Na(1) | 11                                | HexNAc(4)Hex(5)NeuAc(2)Na(2)       | 10                                | HexNAc(4)Hex(5)Fuc(1)NeuAc(1)Na(1) |
| N331  | 3                                 | HexNAc(3)Hex(6)Fuc(1)NeuAc(1)      | 3                                 | HexNAc(3)Hex(4)NeuAc(1)            | 2                                 | HexNAc(4)Hex(5)Fuc(1)NeuAc(1)Na(1) | 0                                 | N/A                                |
| N343  | 4                                 | HexNAc(4)Hex(5)NeuAc(2)Na(1)       | 6                                 | HexNAc(4)Hex(5)NeuAc(2)Na(1)       | 4                                 | HexNAc(4)Hex(5)NeuAc(2)Na(1)       | 7                                 | HexNAc(6)Hex(3)Fuc(1)NeuAc(2)      |
| N603  | 12                                | HexNAc(4)Hex(5)Fuc(1)NeuAc(1)Na(1) | 7                                 | HexNAc(4)Hex(5)Fuc(1)NeuAc(2)Na(1) | 16                                | HexNAc(6)Hex(3)Fuc(1)NeuAc(1)      | 3                                 | HexNAc(5)Hex(5)NeuAc(1)            |
| N616  | 13                                | HexNAc(4)Hex(5)Fuc(1)NeuAc(2)      | 9                                 | HexNAc(4)Hex(5)NeuAc(1)Na(1)       | 18                                | HexNAc(4)Hex(5)Fuc(1)NeuAc(2)      | 2                                 | HexNAc(2)Hex(9)                    |
| N657  | 0                                 | N/A                                | 0                                 | N/A                                | 5                                 | HexNAc(6)Hex(3)Fuc(1)NeuAc(2)      | 0                                 | N/A                                |
| N709  | 5                                 | HexNAc(4)Hex(6)Fuc(1)NeuAc(1)Na(1) | 1                                 | HexNAc(5)Hex(6)NeuAc(1)            | 17                                | HexNAc(4)Hex(5)Fuc(1)NeuAc(2)      | 3                                 | HexNAc(4)Hex(5)NeuAc(1)            |
| N717  | 14                                | HexNAc(4)Hex(5)Fuc(1)NeuAc(2)      | 7                                 | HexNAc(4)Hex(5)Fuc(1)NeuAc(1)Na(1) | 25                                | HexNAc(6)Hex(3)Fuc(1)NeuAc(2)      | 4                                 | HexNAc(4)Hex(5)Fuc(1)NeuAc(2)Na(2) |
| N801  | 44                                | HexNAc(4)Hex(5)Fuc(1)NeuAc(1)      | 46                                | HexNAc(4)Hex(5)Fuc(1)NeuAc(1)      | 42                                | HexNAc(6)Hex(3)Fuc(1)NeuAc(1)      | 40                                | HexNAc(3)Hex(6)Fuc(1)NeuAc(1)      |
| N1074 | 0                                 | N/A                                | 7                                 | HexNAc(4)Hex(5)NeuAc(2)Na(1)       | 1                                 | HexNAc(4)Hex(5)NeuAc(1)            | 7                                 | HexNAc(4)Hex(5)Fuc(1)NeuAc(1)      |
| N1098 | 50                                | HexNAc(4)Hex(5)Fuc(1)NeuAc(2)Na(2) | 52                                | HexNAc(4)Hex(5)Fuc(1)NeuAc(1)      | 52                                | HexNAc(4)Hex(5)Fuc(1)NeuAc(2)Na(2) | 49                                | HexNAc(4)Hex(5)Fuc(1)NeuAc(2)      |
| N1134 | 5                                 | HexNAc(4)Hex(5)NeuAc(2)Na(1)       | 12                                | HexNAc(4)Hex(6)Fuc(1)NeuAc(1)      | 21                                | HexNAc(6)Hex(3)Fuc(1)NeuAc(1)      | 5                                 | HexNAc(3)Hex(6)Fuc(1)NeuAc(1)      |
| N1158 | 12                                | HexNAc(4)Hex(5)Fuc(1)NeuAc(1)      | 6                                 | HexNAc(4)Hex(5)NeuAc(2)Na(1)       | 7                                 | HexNAc(4)Hex(4)NeuAc(1)            | 9                                 | HexNAc(4)Hex(5)Fuc(1)NeuAc(1)      |
| N1173 | 11                                | HexNAc(6)Hex(3)Fuc(1)NeuAc(2)      | 6                                 | HexNAc(6)Hex(4)NeuAc(1)            | 7                                 | HexNAc(6)Hex(3)Fuc(1)NeuAc(2)      | 9                                 | HexNAc(6)Hex(3)Fuc(1)NeuAc(2)      |
| N1194 | 23                                | HexNAc(4)Hex(5)NeuAc(2)Na(2)       | 30                                | HexNAc(4)Hex(5)Fuc(1)NeuAc(1)      | 27                                | HexNAc(4)Hex(5)Fuc(1)NeuAc(1)      | 14                                | HexNAc(4)Hex(5)Fuc(1)NeuAc(1)      |

1068

1069

1070

1071

1072

1073

**Glycosylation profile of SARS-CoV-2 spike variants.** N-linked glycans were identified by mass spectrometry. The number of glycans identified at each site and an example glycan are reported.

1074 **Table S2.**

1075 **A**

| Number of spectral peaks in bimodal peptides at deuterium exchange time = 1 min |            |             |            |             |                |
|---------------------------------------------------------------------------------|------------|-------------|------------|-------------|----------------|
| Peptide                                                                         | WT         | D614G       | Alpha      | Delta       | Omicron (BA.1) |
| 553-568                                                                         | 15         | 13          | 13         | 13          | 13             |
| 875-882                                                                         | 7.5 ± 0.5  | 6           | 6.3 ± 0.57 | 5.6 ± 0.57  | 3.3 ± 0.57     |
| 900-913                                                                         | 12         | 10          | 10         | 9.6 ± 0.57  | 10             |
| 943-958                                                                         | 14.5 ± 0.5 | 13.3 ± 1.15 | 13         | 13.6 ± 0.57 | -              |
| 988-998                                                                         | 9          | 6.3 ± 0.57  | 5          | 6.6 ± 0.57  | 6.3 ± 0.57     |

1076

1077 **B**

| Number of spectral peaks in bimodal peptides at deuterium exchange time = 10 min |             |             |            |            |                |
|----------------------------------------------------------------------------------|-------------|-------------|------------|------------|----------------|
| Peptide                                                                          | WT          | D614G       | Alpha      | Delta      | Omicron (BA.1) |
| 553-568                                                                          | 14          | 13          | 13         | 13         | 14             |
| 875-882                                                                          | 8           | 6.3 ± 0.57  | 7          | 6.3 ± 0.57 | 3              |
| 900-913                                                                          | 15          | 13          | 13         | 11         | 12             |
| 943-958                                                                          | 16          | 15.6 ± 0.57 | 16         | 12         | -              |
| 988-998                                                                          | 10.3 ± 0.57 | 7.6 ± 1.15  | 5.3 ± 0.57 | 8±1        | 8              |

1078

1079 **Differential ensemble behavior across S variants inferred from spectral broadening. A)**

1080 Table showing spectral broadening at Dex = 1 min B) Table showing spectral broadening at Dex  
1081 = 10 min. The number of spectral peaks were determined based on the assigned sticks during  
1082 HDXMS analysis across common peptides.

1083

1084

1085 **Table S3.**

| Peptide | Sequence              | D614G – WT ( $\Delta$ Dex) | Alpha – WT ( $\Delta$ Dex) | Delta – WT ( $\Delta$ Dex) | Omicron – WT ( $\Delta$ Dex) |
|---------|-----------------------|----------------------------|----------------------------|----------------------------|------------------------------|
| 177-191 | MDLEGKQGNFKNLRE       | $0.5 \pm 0.2$ Da           | $1.1 \pm 0.2$ Da           | $-0.2 \pm 0.2$ Da          | $0.3 \pm 0.2$ Da             |
| 245-265 | HRSYLTPGDSSSGWTAGAAAY | $0.7 \pm 0.4$ Da           | $0.6 \pm 0.4$ Da           | $-0.6 \pm 0.5$ Da          | $1.1 \pm 0.3$ Da             |
| 456-467 | FRKSNLKPFERD          | $0.2 \pm 0.1$ Da           | $0.0 \pm 0.1$ Da           | $0.0 \pm 0.1$ Da           | $0.5 \pm 0.1$ Da             |

1086

1087 **Differences in NTD deuterium uptake comparing D614G and variants with WT at Dex =**

1088 **30 min.**

1089

1090 **Table S4.**

| Peptide | Sequence                                         | Variant | $\Delta$ Da 1 min | $\Delta$ Da 2 min | $\Delta$ Da 10 min | $\Delta$ Da 30 min |
|---------|--------------------------------------------------|---------|-------------------|-------------------|--------------------|--------------------|
| 92-103  | FAS <b>I</b> EKSNIIRG                            | Omicron | $-0.2 \pm 0.1$    | $0.2 \pm 0.1$     | $0.9 \pm 0.1$      | $0.9 \pm 0.1$      |
| 401-420 | VIRGDEV <b>R</b> QIAPGQTG <b>N</b> IAD           | Omicron | $0.6 \pm 0.3$     | $0.7 \pm 0.3$     | $0.5 \pm 0.3$      | $0.3 \pm 0.3$      |
| 401-421 | VIRGDEV <b>R</b> QIAPGQTG <b>N</b> IAD <b>Y</b>  | Omicron | $0.5 \pm 0.3$     | $0.9 \pm 0.3$     | $0.4 \pm 0.3$      | $0.3 \pm 0.3$      |
| 407-420 | VRQIAPGQTG <b>N</b> IAD                          | Omicron | $0.6 \pm 0.2$     | $0.7 \pm 0.2$     | $0.5 \pm 0.2$      | $0.5 \pm 0.2$      |
| 407-421 | VRQIAPGQTG <b>N</b> IAD <b>Y</b>                 | Omicron | $0.5 \pm 0.3$     | $0.8 \pm 0.3$     | $0.6 \pm 0.3$      | $0.3 \pm 0.3$      |
| 407-422 | VRQIAPGQTG <b>N</b> IAD <b>Y</b> N               | Omicron | $-0.4 \pm 0.1$    | $-0.3 \pm 0.1$    | $-0.1 \pm 0.1$     | $0.1 \pm 0.1$      |
| 442-452 | DSK <b>V</b> SGNYNYL                             | Omicron | $0.3 \pm 0.2$     | $0.5 \pm 0.2$     | $0.1 \pm 0.2$      | $-0.2 \pm 0.2$     |
| 444-452 | K <b>V</b> SGNYNYL                               | Omicron | $-1.5 \pm 0.2$    | $-1.3 \pm 0.2$    | $-1.2 \pm 0.2$     | $-1.1 \pm 0.2$     |
| 542-552 | NF <b>N</b> GL <b>K</b> GTGVL                    | Omicron | $-0.2 \pm 0.1$    | $-0.2 \pm 0.1$    | $-0.5 \pm 0.1$     | $-0.5 \pm 0.1$     |
| 544-552 | N <b>G</b> L <b>K</b> GTGVL                      | Omicron | $0.1 \pm 0.1$     | $0.0 \pm 0.1$     | $-0.2 \pm 0.1$     | $-0.2 \pm 0.1$     |
| 569-582 | <b>I</b> DDTTDAVRDPQTL                           | Alpha   | $-0.2 \pm 0.3$    | $-0.3 \pm 0.3$    | $-0.4 \pm 0.3$     | $-0.5 \pm 0.3$     |
| 761-768 | <b>K</b> RALT <b>G</b> IA                        | Omicron | $-0.2 \pm 0.2$    | $-0.1 \pm 0.2$    | $-0.2 \pm 0.2$     | $-0.3 \pm 0.2$     |
| 780-793 | AQ <b>V</b> KQI <b>Y</b> KTPPI <b>K</b> <b>Y</b> | Omicron | $-0.2 \pm 0.3$    | $-0.1 \pm 0.3$    | $-0.1 \pm 0.3$     | $-0.2 \pm 0.3$     |
| 943-958 | G <b>K</b> L <b>N</b> VVNQNAQALNT                | Delta   | $1.1 \pm 0.4$     | $0.3 \pm 0.4$     | $0.2 \pm 0.4$      | $-0.2 \pm 0.4$     |
| 943-958 | G <b>K</b> L <b>N</b> VVNQNAQALNT                | Omicron | $-1.9 \pm 0.3$    | $-1.3 \pm 0.3$    | $-1.3 \pm 0.3$     | $-1.7 \pm 0.3$     |
| 959-967 | LVKQLSS <b>K</b> F                               | Omicron | $0.8 \pm 0.1$     | $0.8 \pm 0.1$     | $0.2 \pm 0.1$      | $0.1 \pm 0.1$      |
| 959-974 | LVKQLSS <b>K</b> FGAISSVL                        | Omicron | $2.1 \pm 0.3$     | $1.9 \pm 0.3$     | $1.9 \pm 0.3$      | $1.7 \pm 0.3$      |
| 977-987 | IL <b>A</b> RLDPPEAE                             | Alpha   | $-0.8 \pm 0.2$    | $-0.7 \pm 0.2$    | $-0.4 \pm 0.2$     | $-0.1 \pm 0.2$     |
| 977-987 | <b>I</b> FSRLDPPEAE                              | Omicron | $0.7 \pm 0.2$     | $0.5 \pm 0.2$     | $-0.2 \pm 0.2$     | $-0.4 \pm 0.2$     |
| 979-987 | <b>A</b> RLDPPEAE                                | Alpha   | $-0.4 \pm 0.2$    | $-0.4 \pm 0.2$    | $-0.9 \pm 0.2$     | $-1.0 \pm 0.2$     |
| 979-989 | <b>A</b> RLDPPEAEVQ                              | Alpha   | $-0.6 \pm 0.2$    | $-0.4 \pm 0.2$    | $-0.5 \pm 0.2$     | $-0.4 \pm 0.2$     |

1091  
 1092 **HDXMS analysis of mutated peptides.** Differences between variants and D614G S for mutated  
 1093 peptides reported in Da for 1, 2, 10, and 30 min exchange. Mutations sites are shown in bold red.  
 1094 Type or paste caption here.

1095  
 1096  
 1097  
 1098

**A**

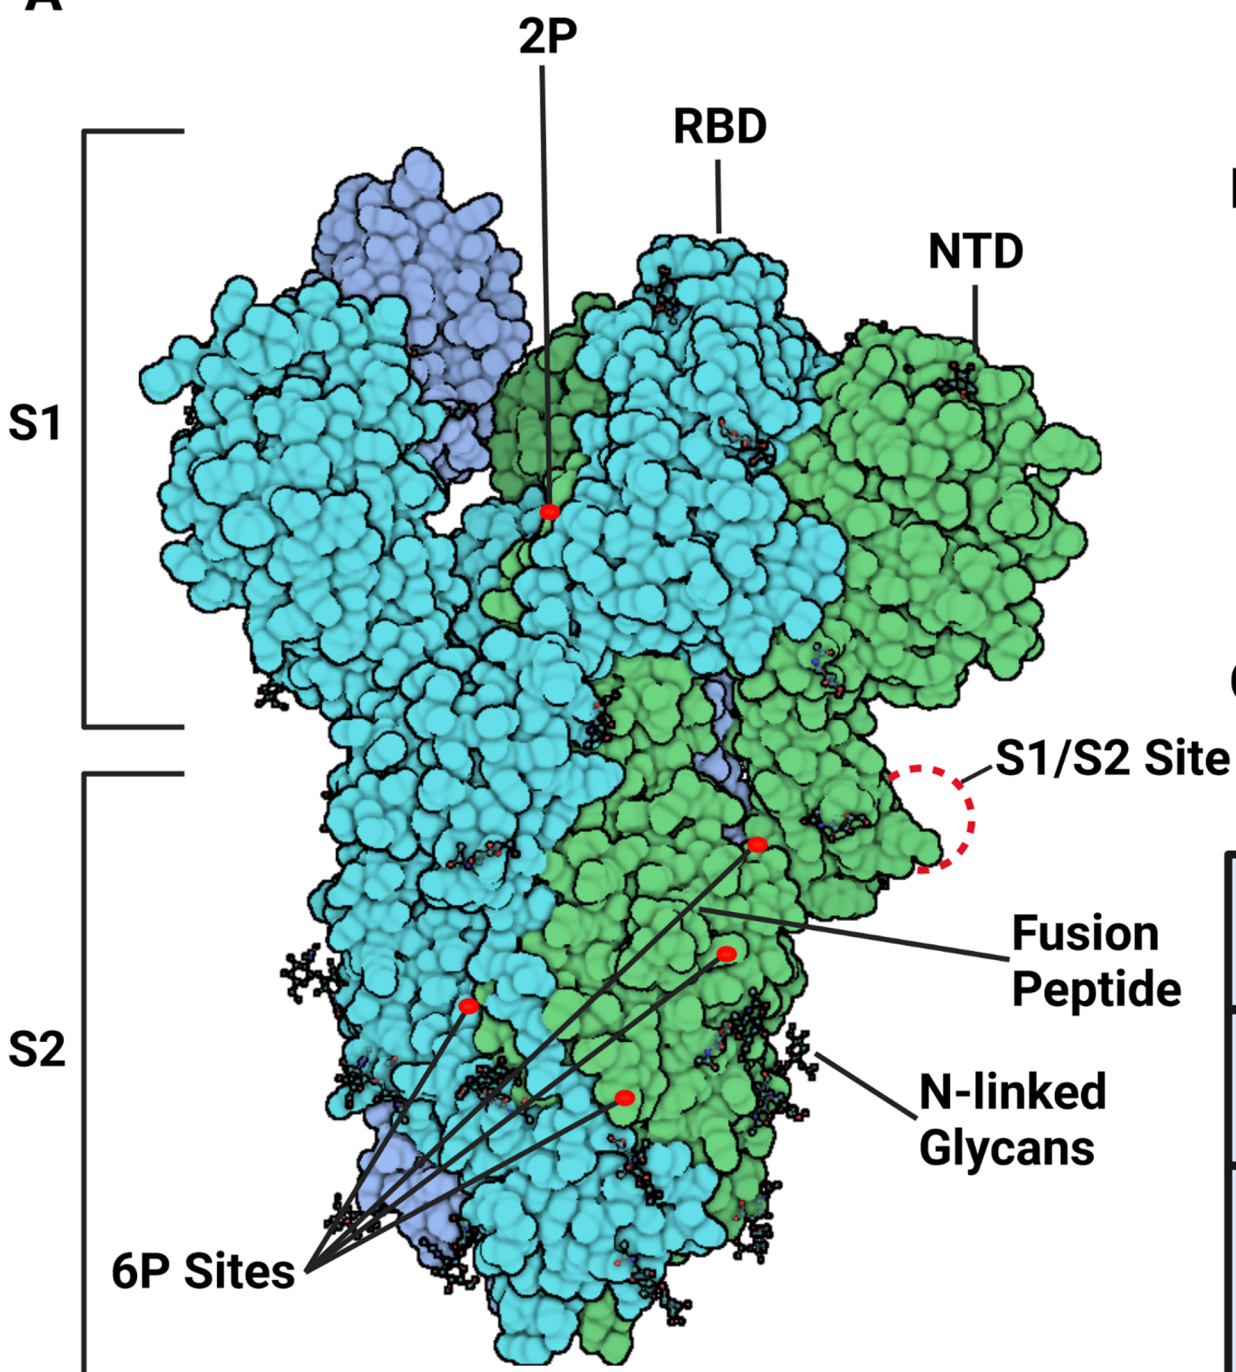

**B**

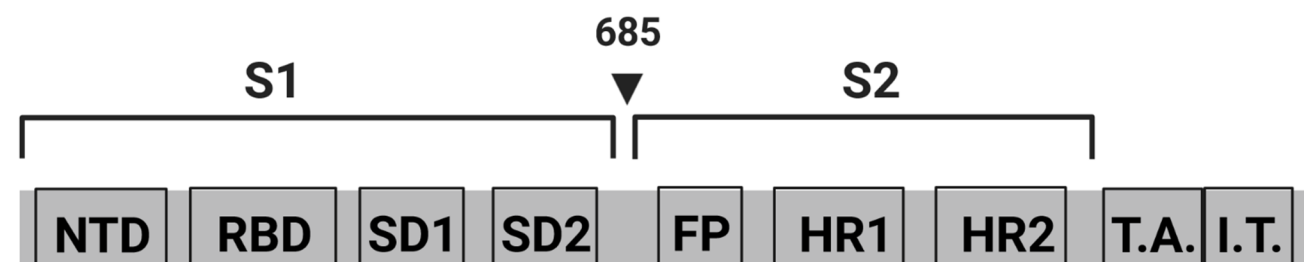

**C**

|                | NTD                                                                   | RBD                                                                                                  | S1                                                 | S2                                                   |
|----------------|-----------------------------------------------------------------------|------------------------------------------------------------------------------------------------------|----------------------------------------------------|------------------------------------------------------|
| Alpha          | $\Delta 69-70$ ,<br>$\Delta 144$                                      | N501Y                                                                                                | A570D,<br><b>D614G</b> , P681H                     | T716L,<br>S982A,<br>D1118A                           |
| Delta          | T19R,<br>$\Delta 157-158$                                             | L452R,<br>T478K                                                                                      | <b>D614G</b> , P681R                               | D950N                                                |
| Omicron (BA.1) | A67V, $\Delta 69-70$ ,<br>T95I,<br>ins214EPE,<br>$\Delta 211$ , L212I | G339D,<br>S371L, S373P,<br>S375F,<br>K417N,<br>N440K,<br>G446S,<br>S477N,<br>T4978K,<br>N501Y, Y505H | T547K,<br><b>D614G</b> ,<br>H655Y,<br>N679K, P681H | N764K,<br>D796Y,<br>N856K,<br>Q954H,<br>N969K, L981F |



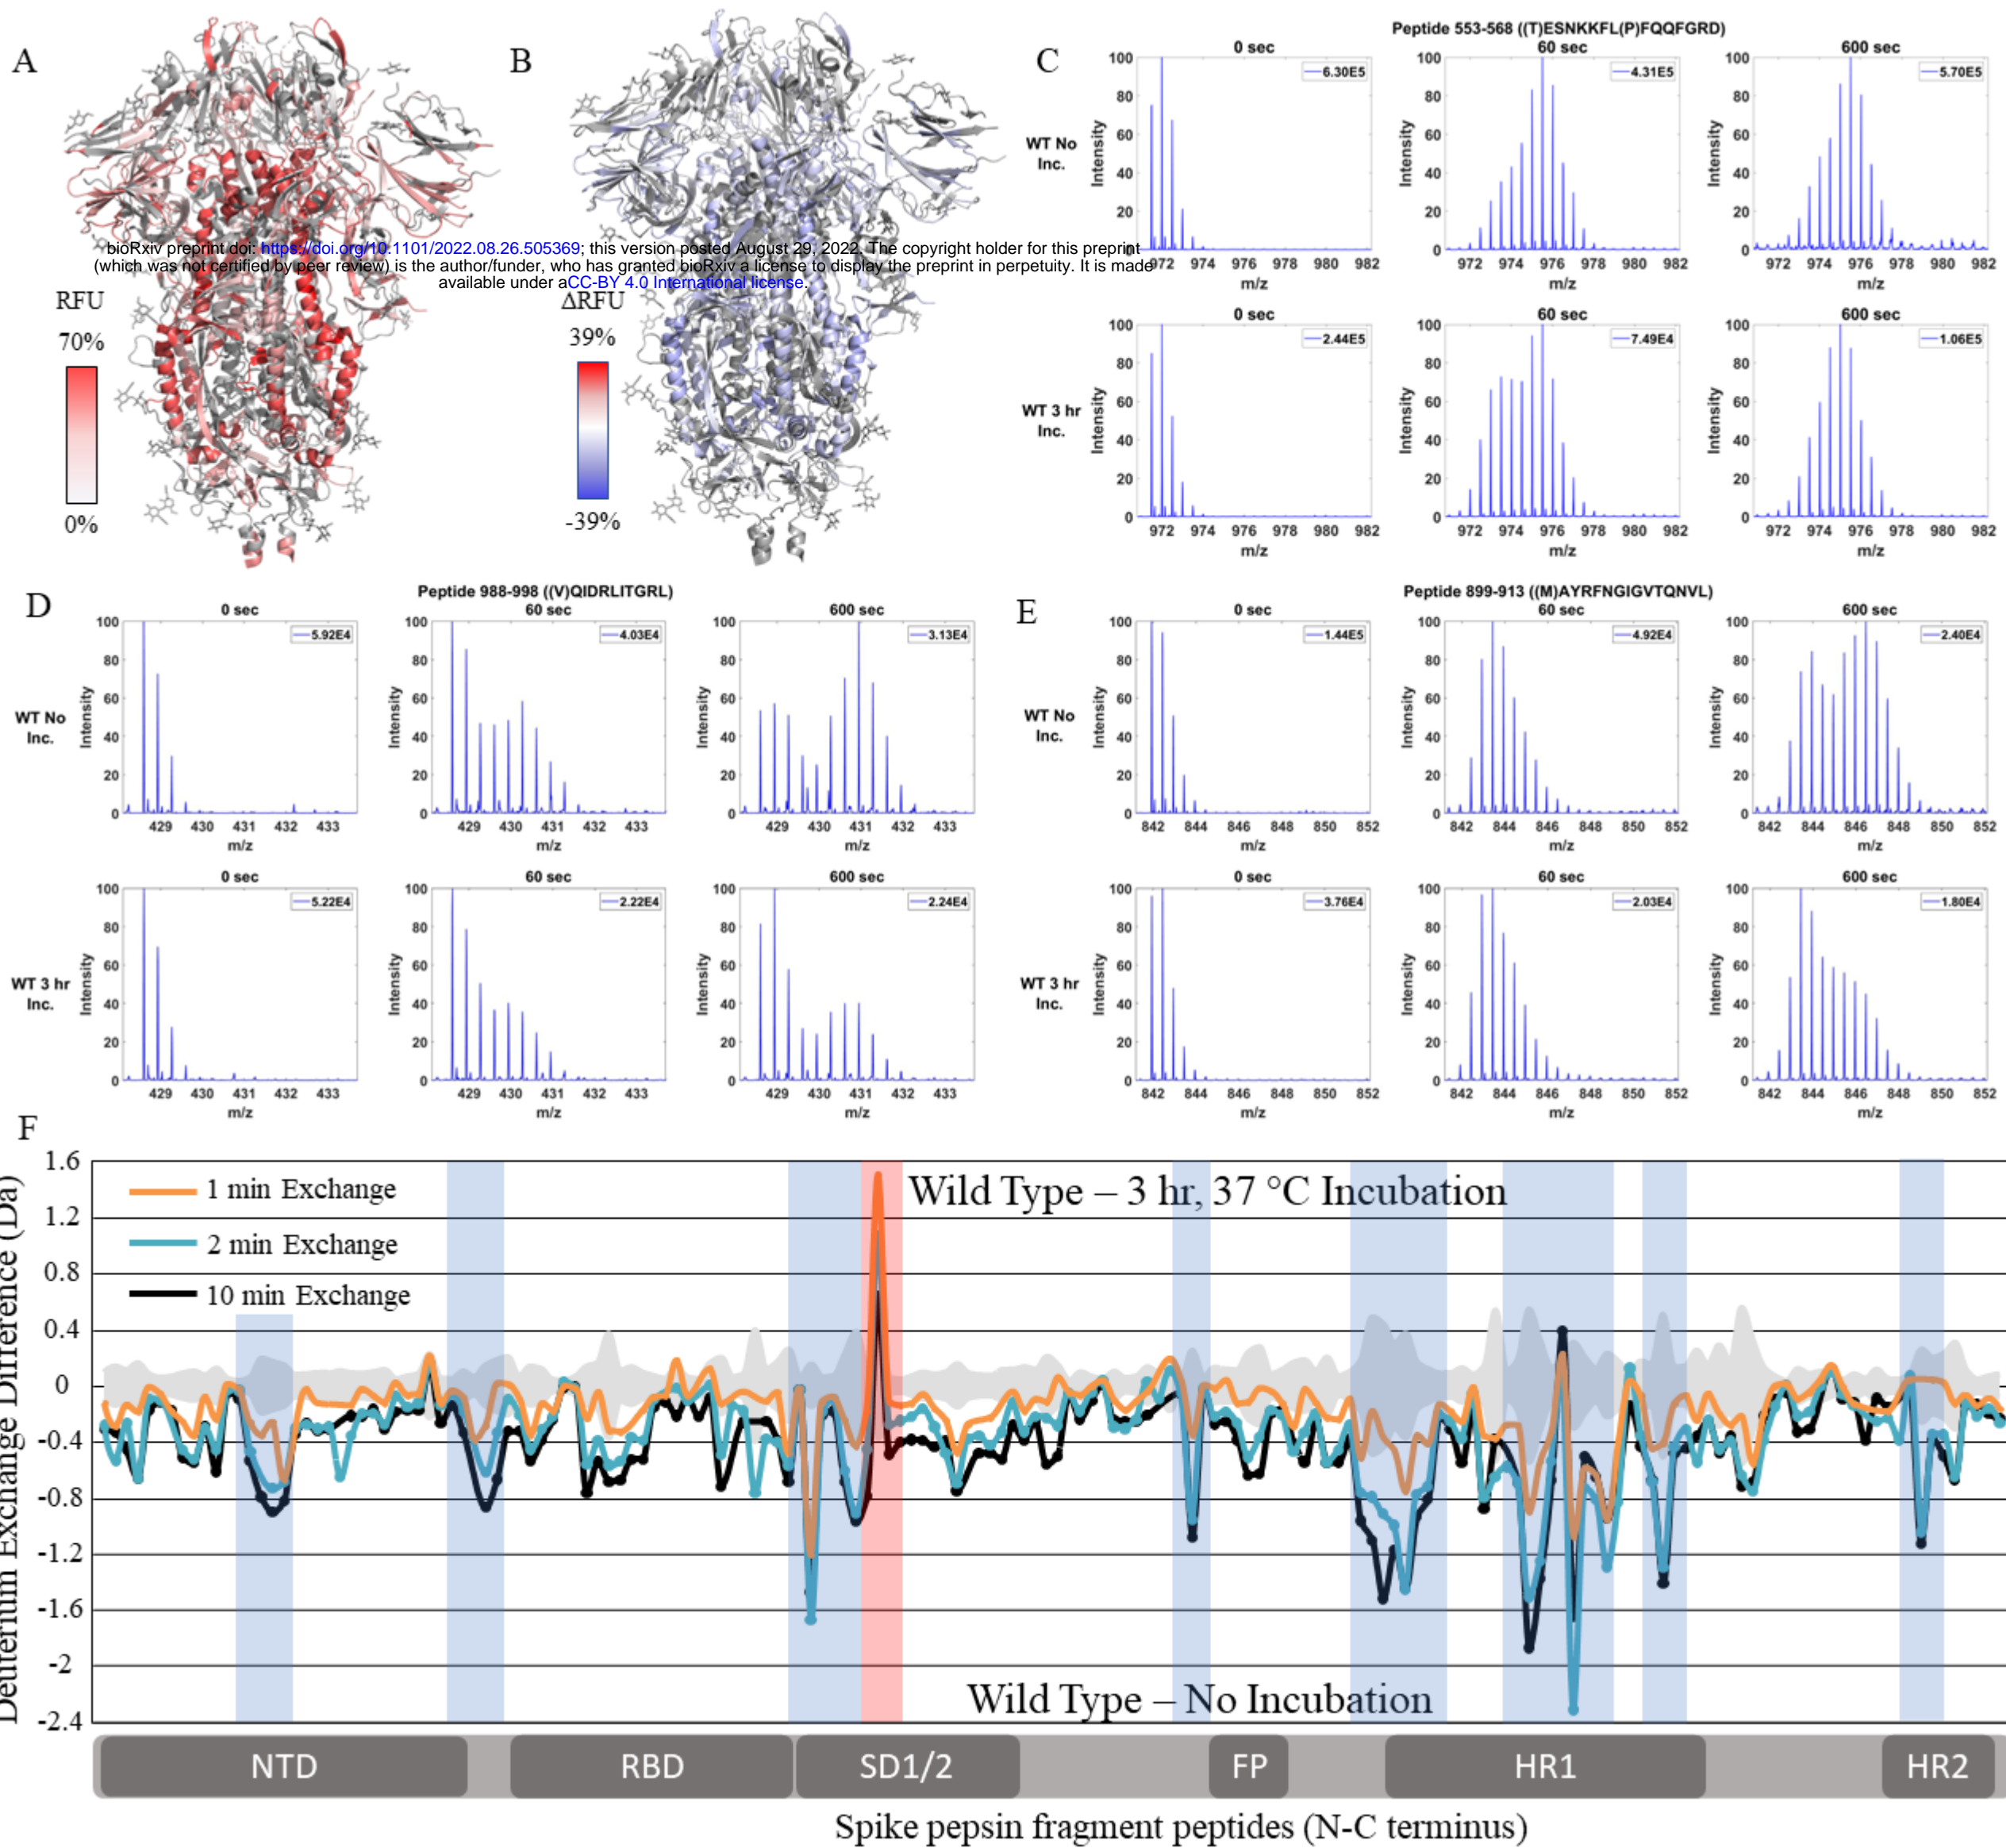

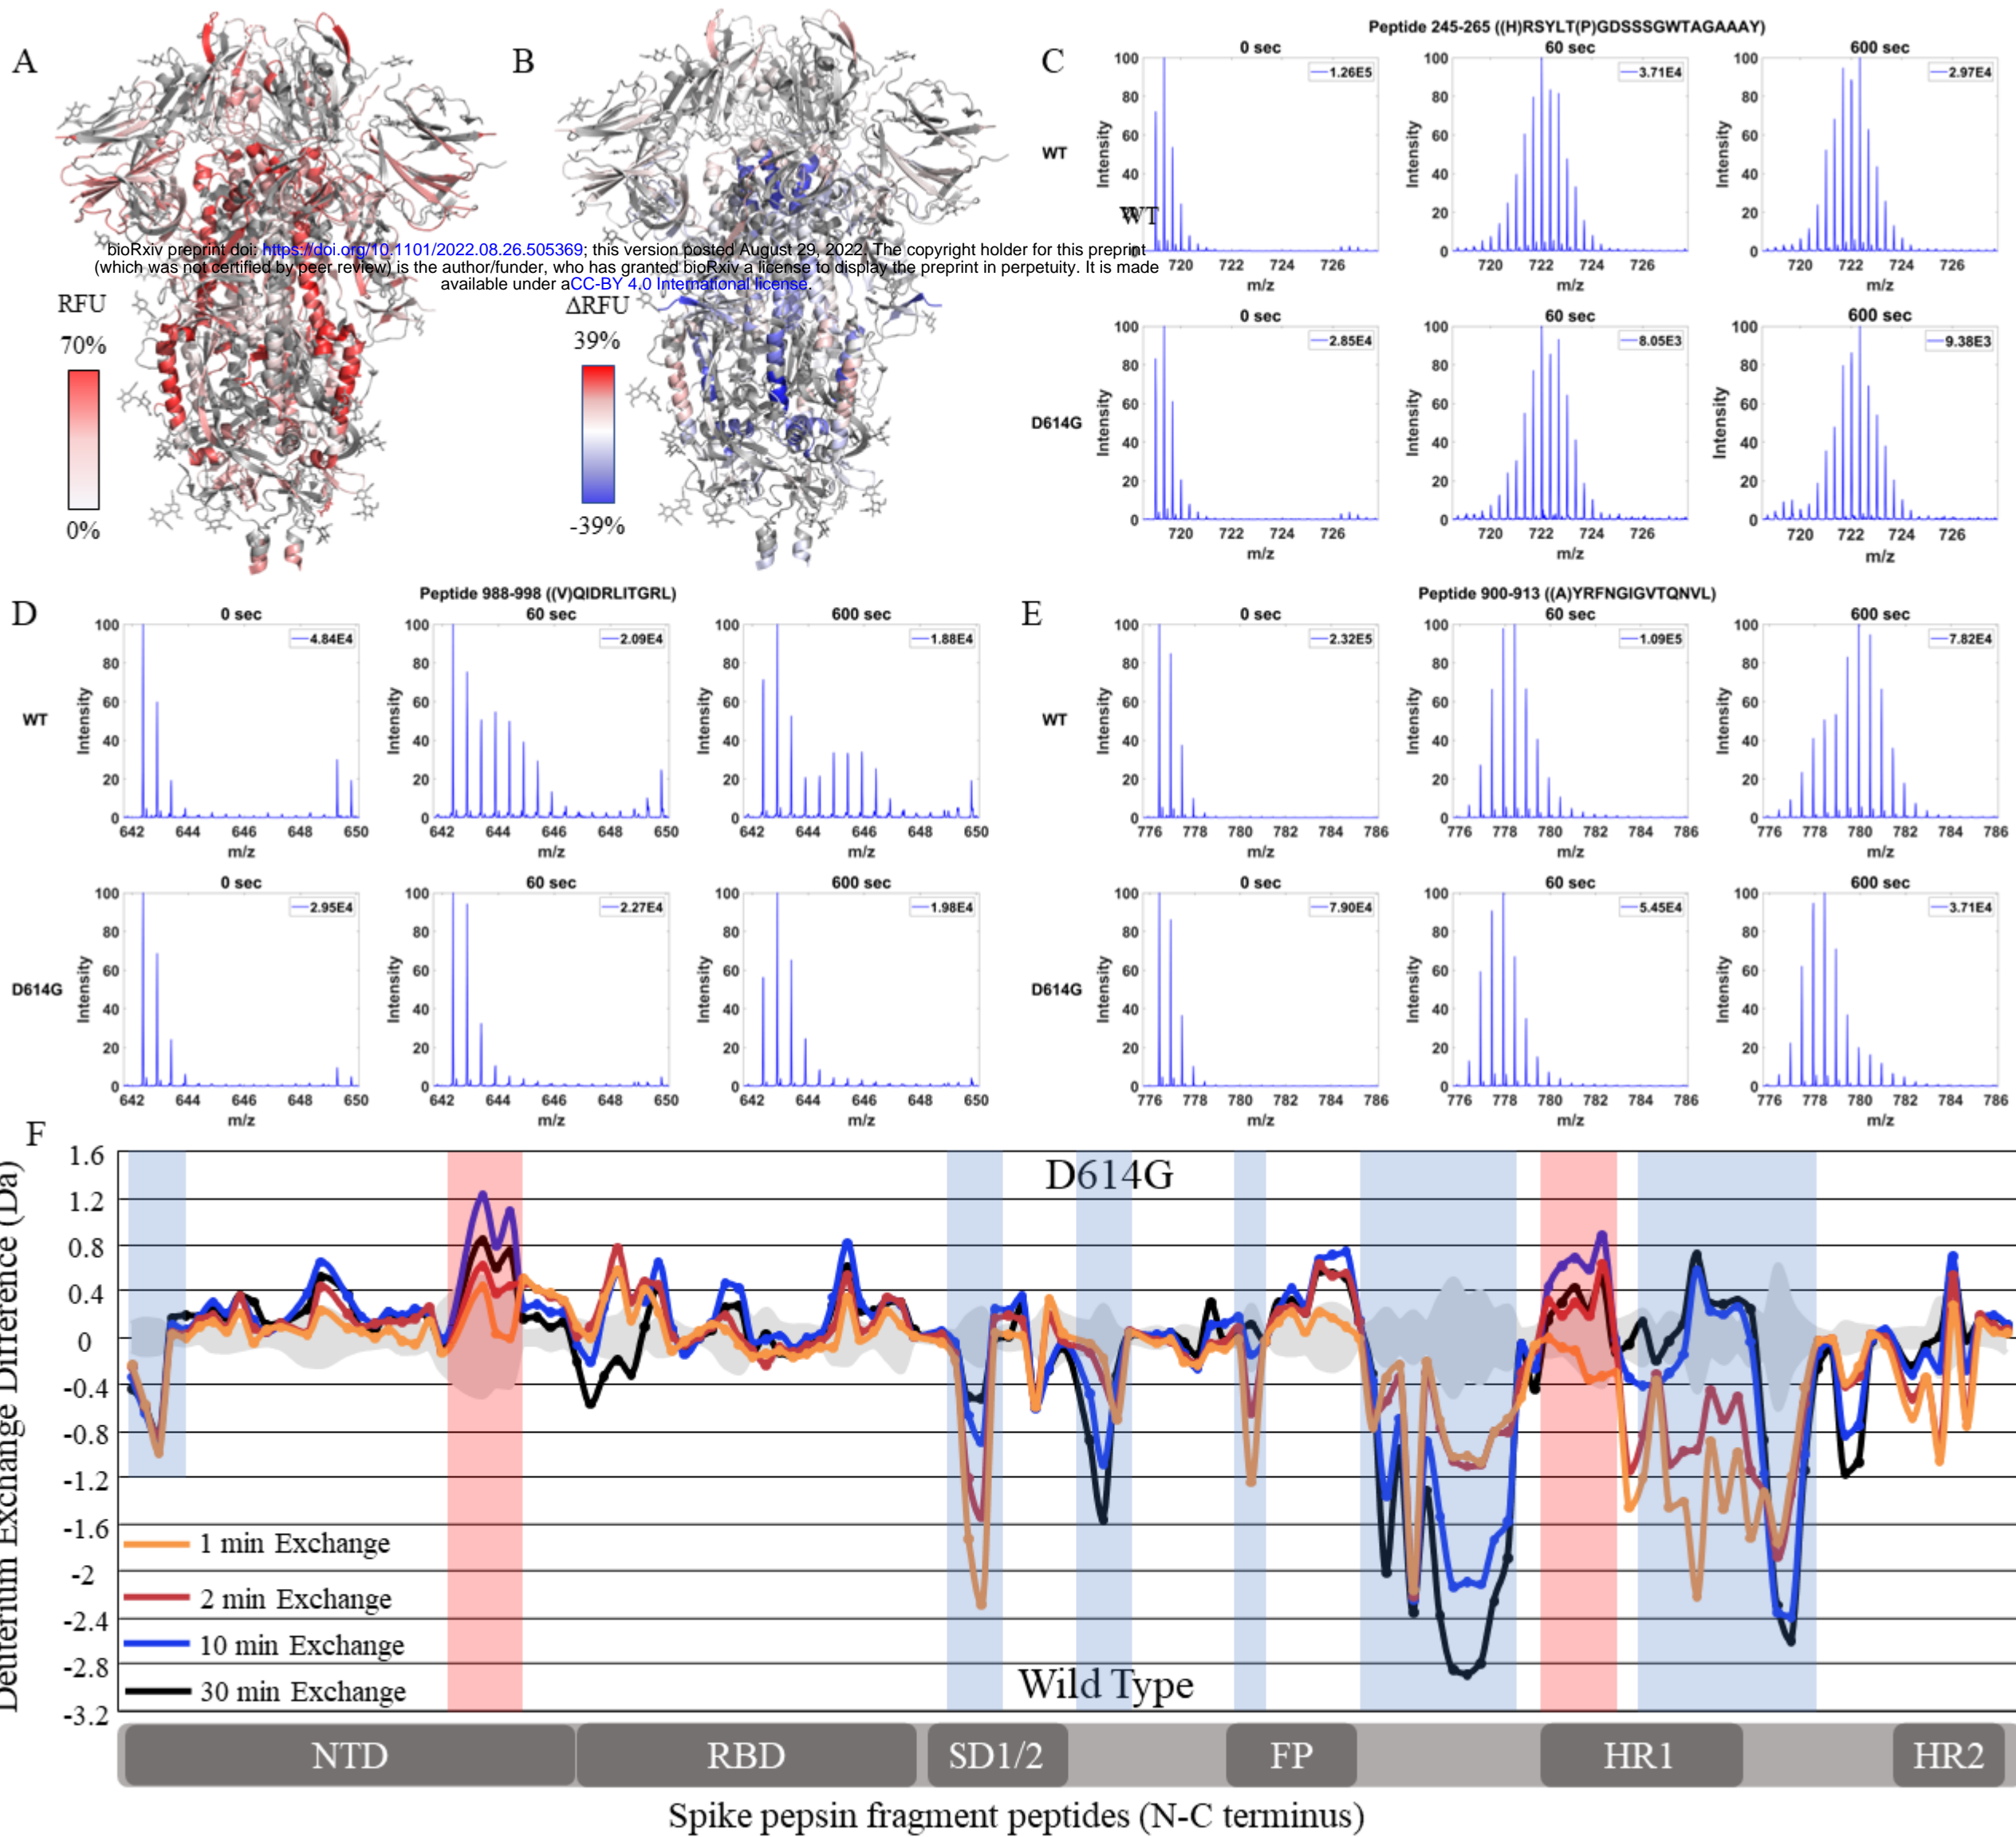



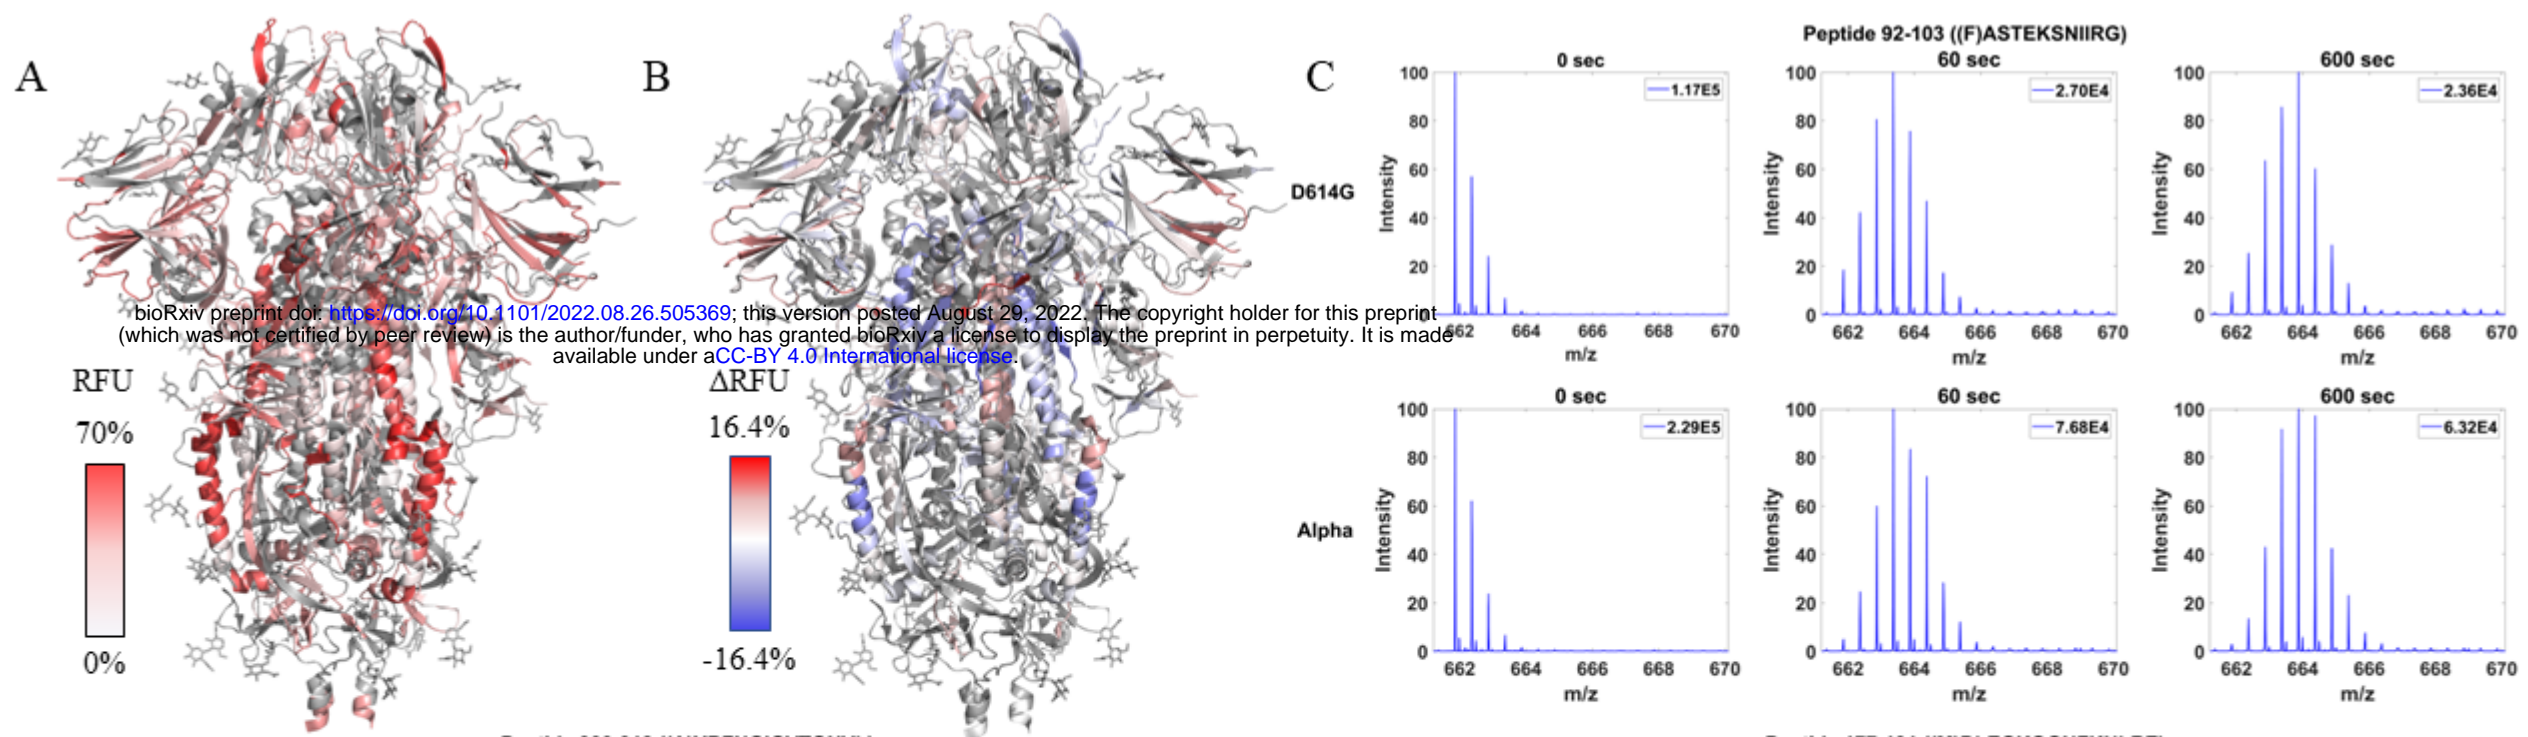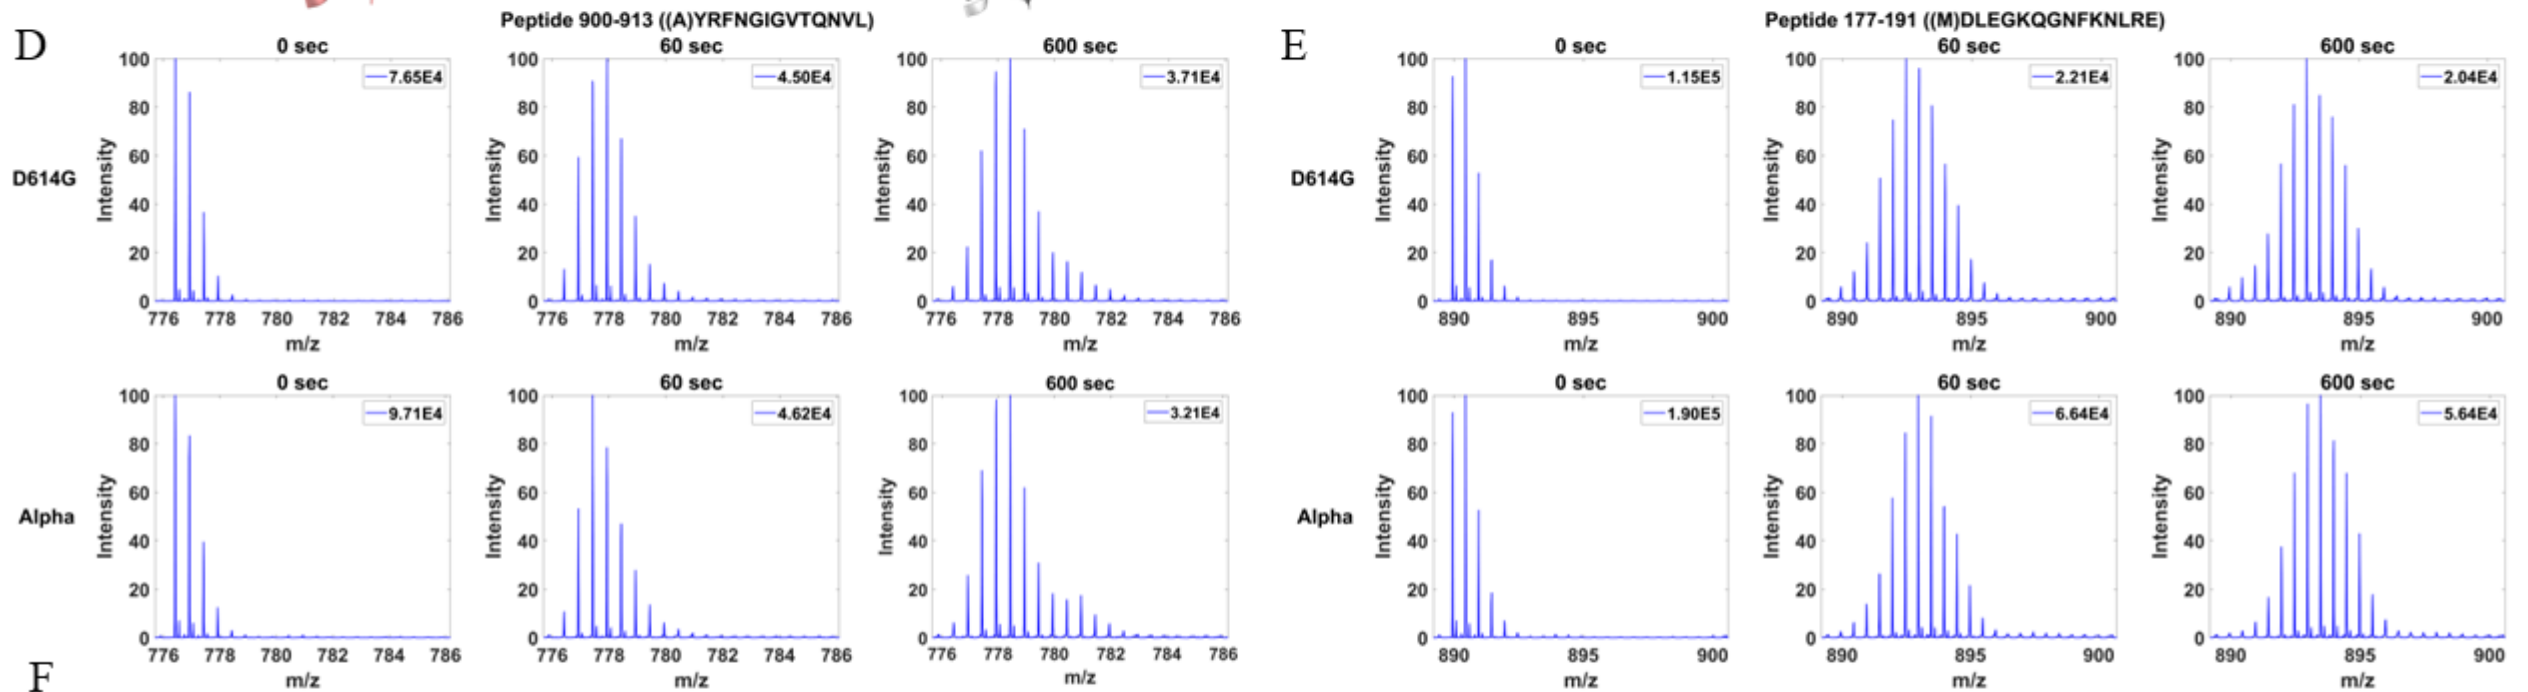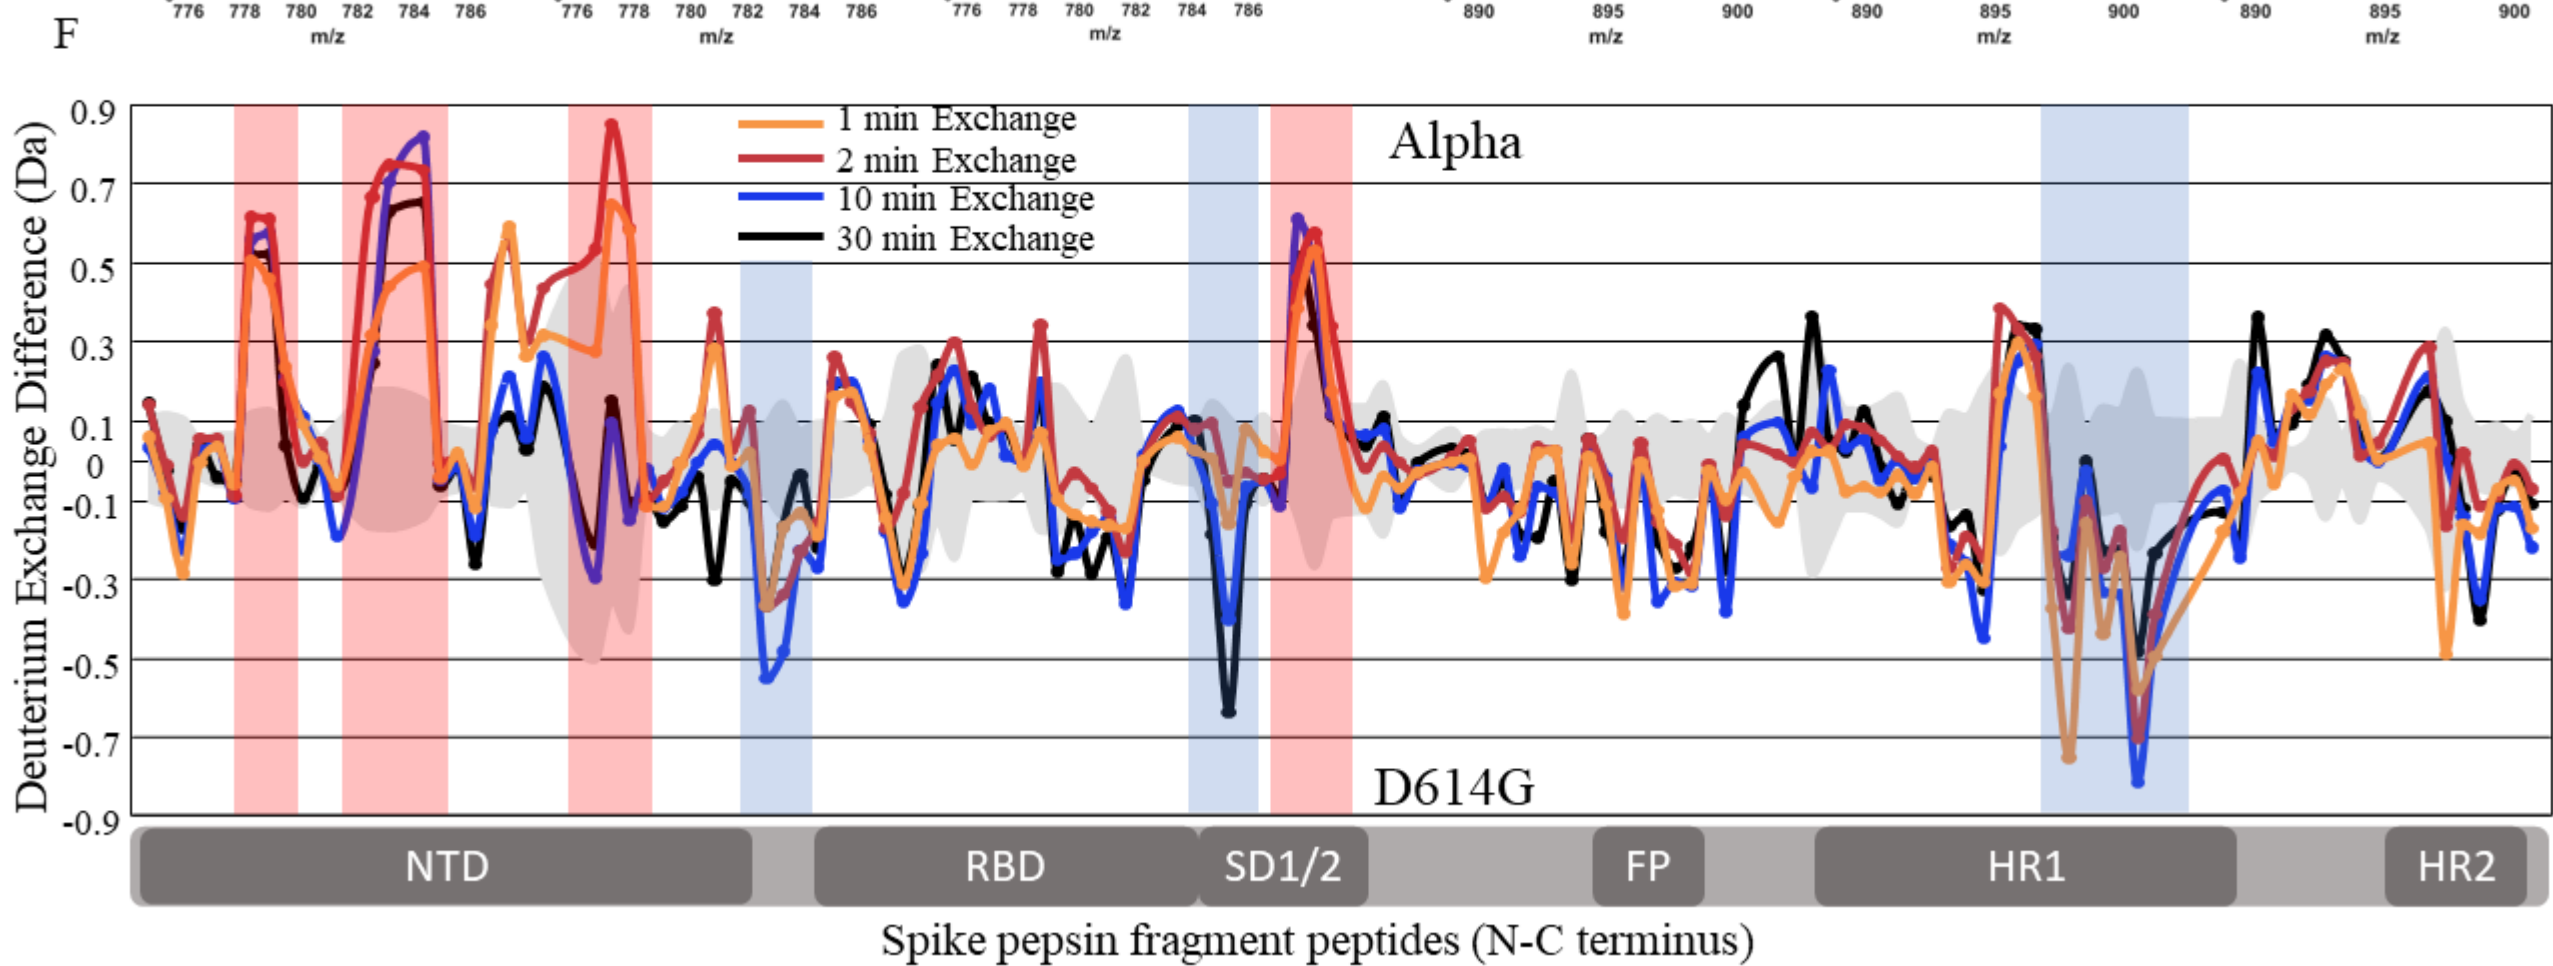

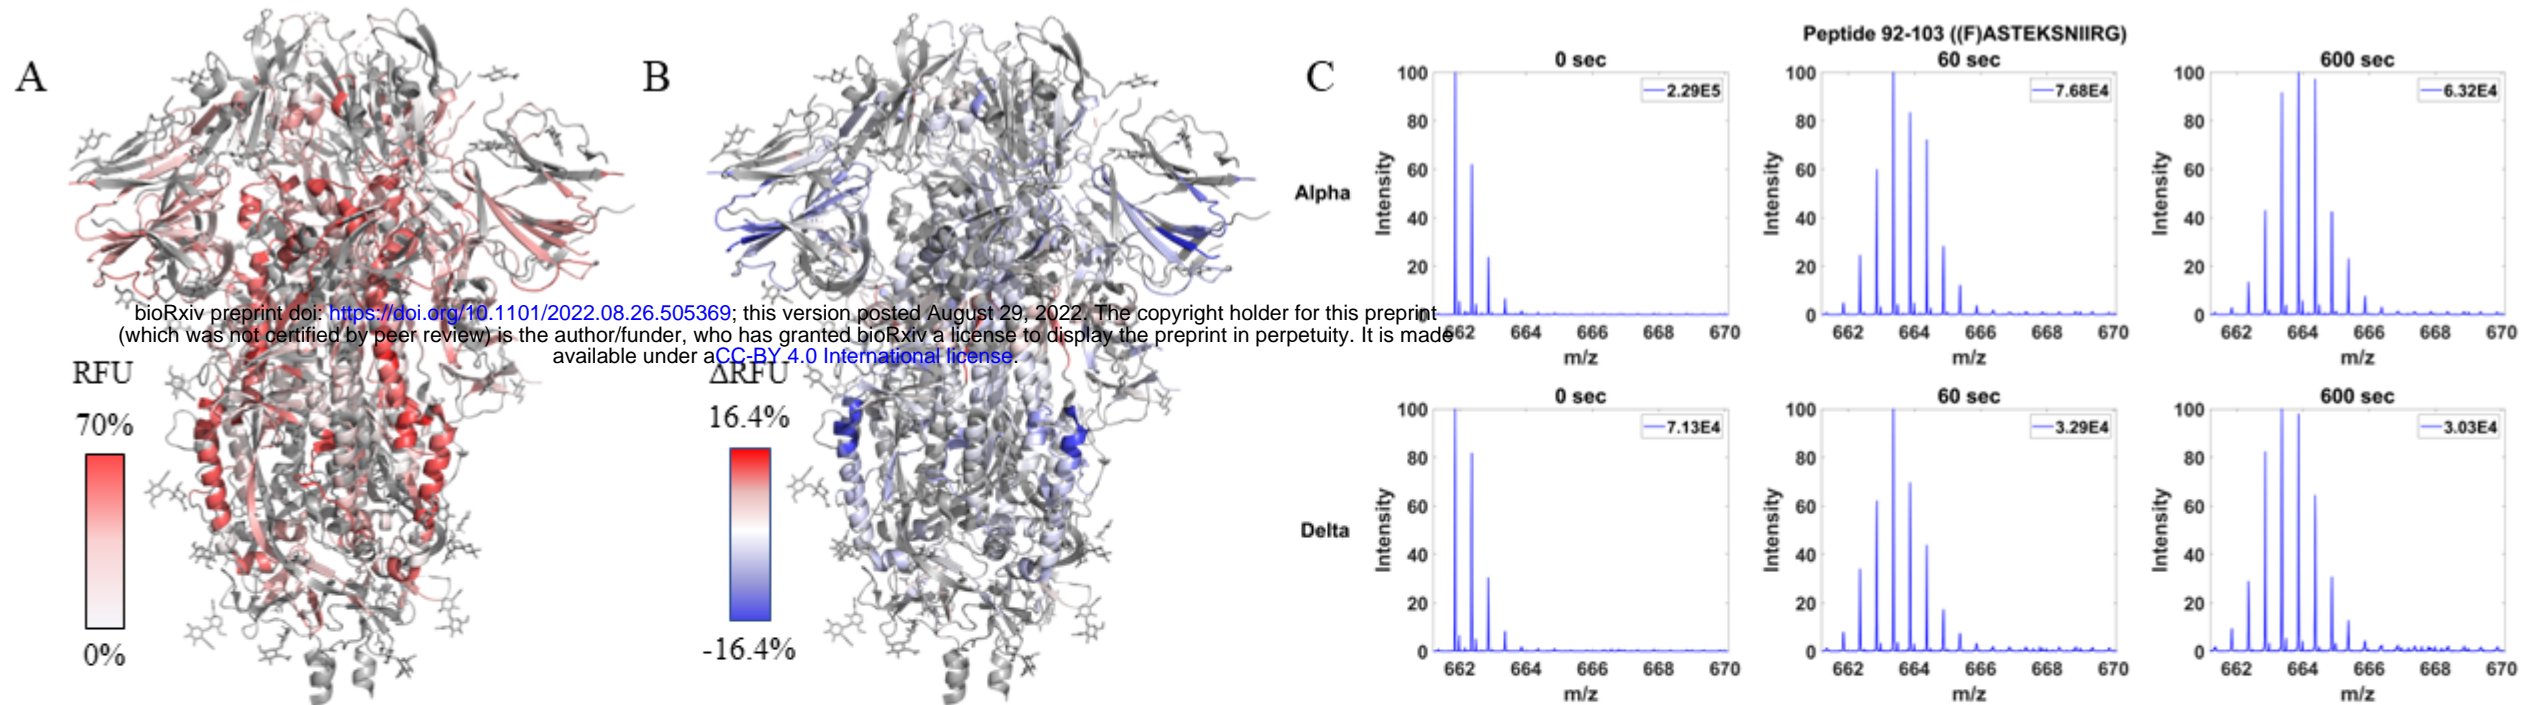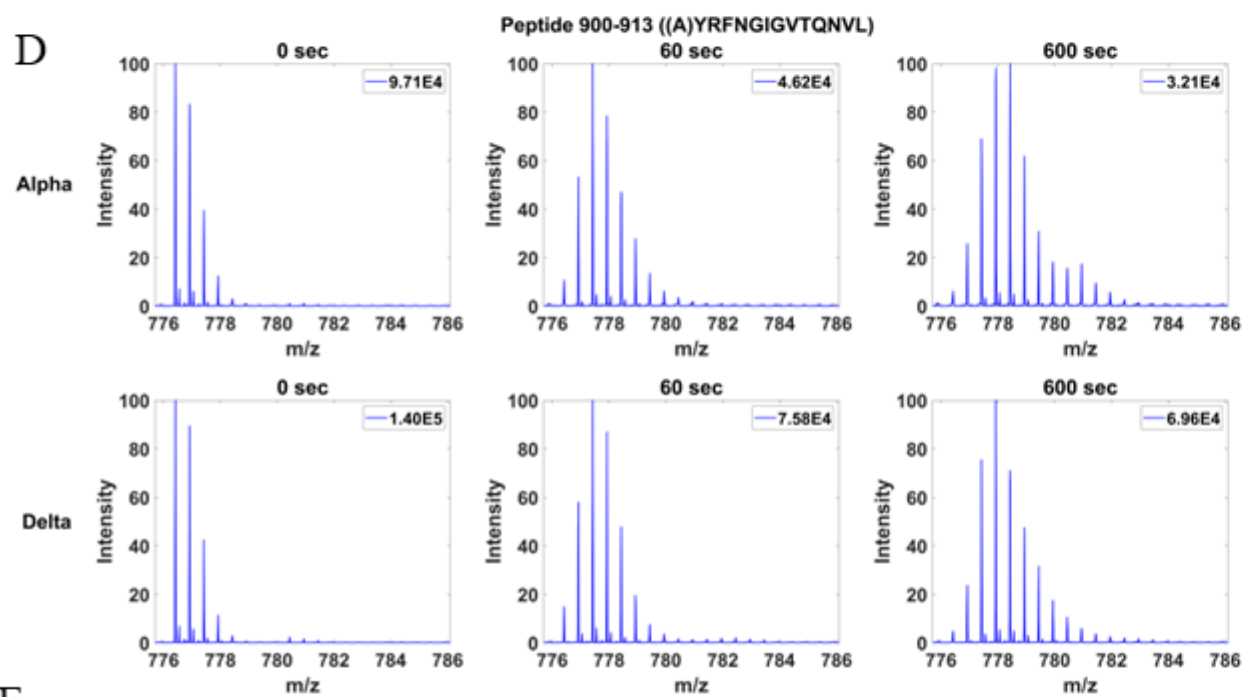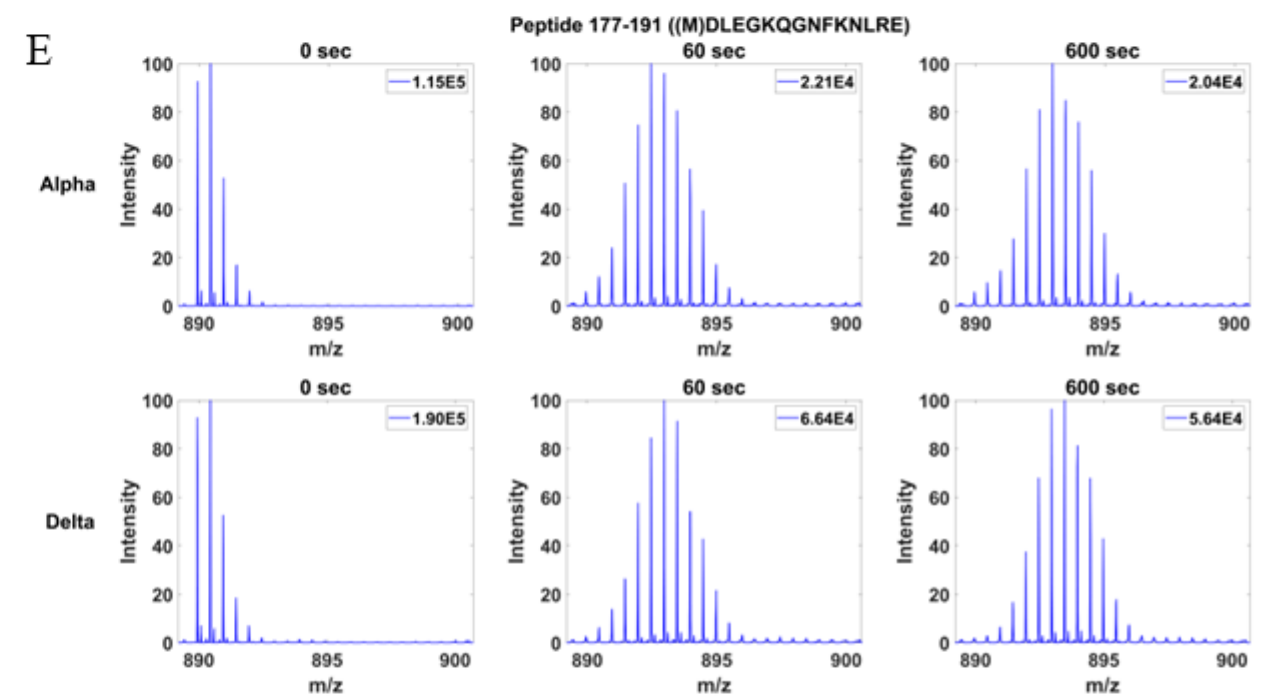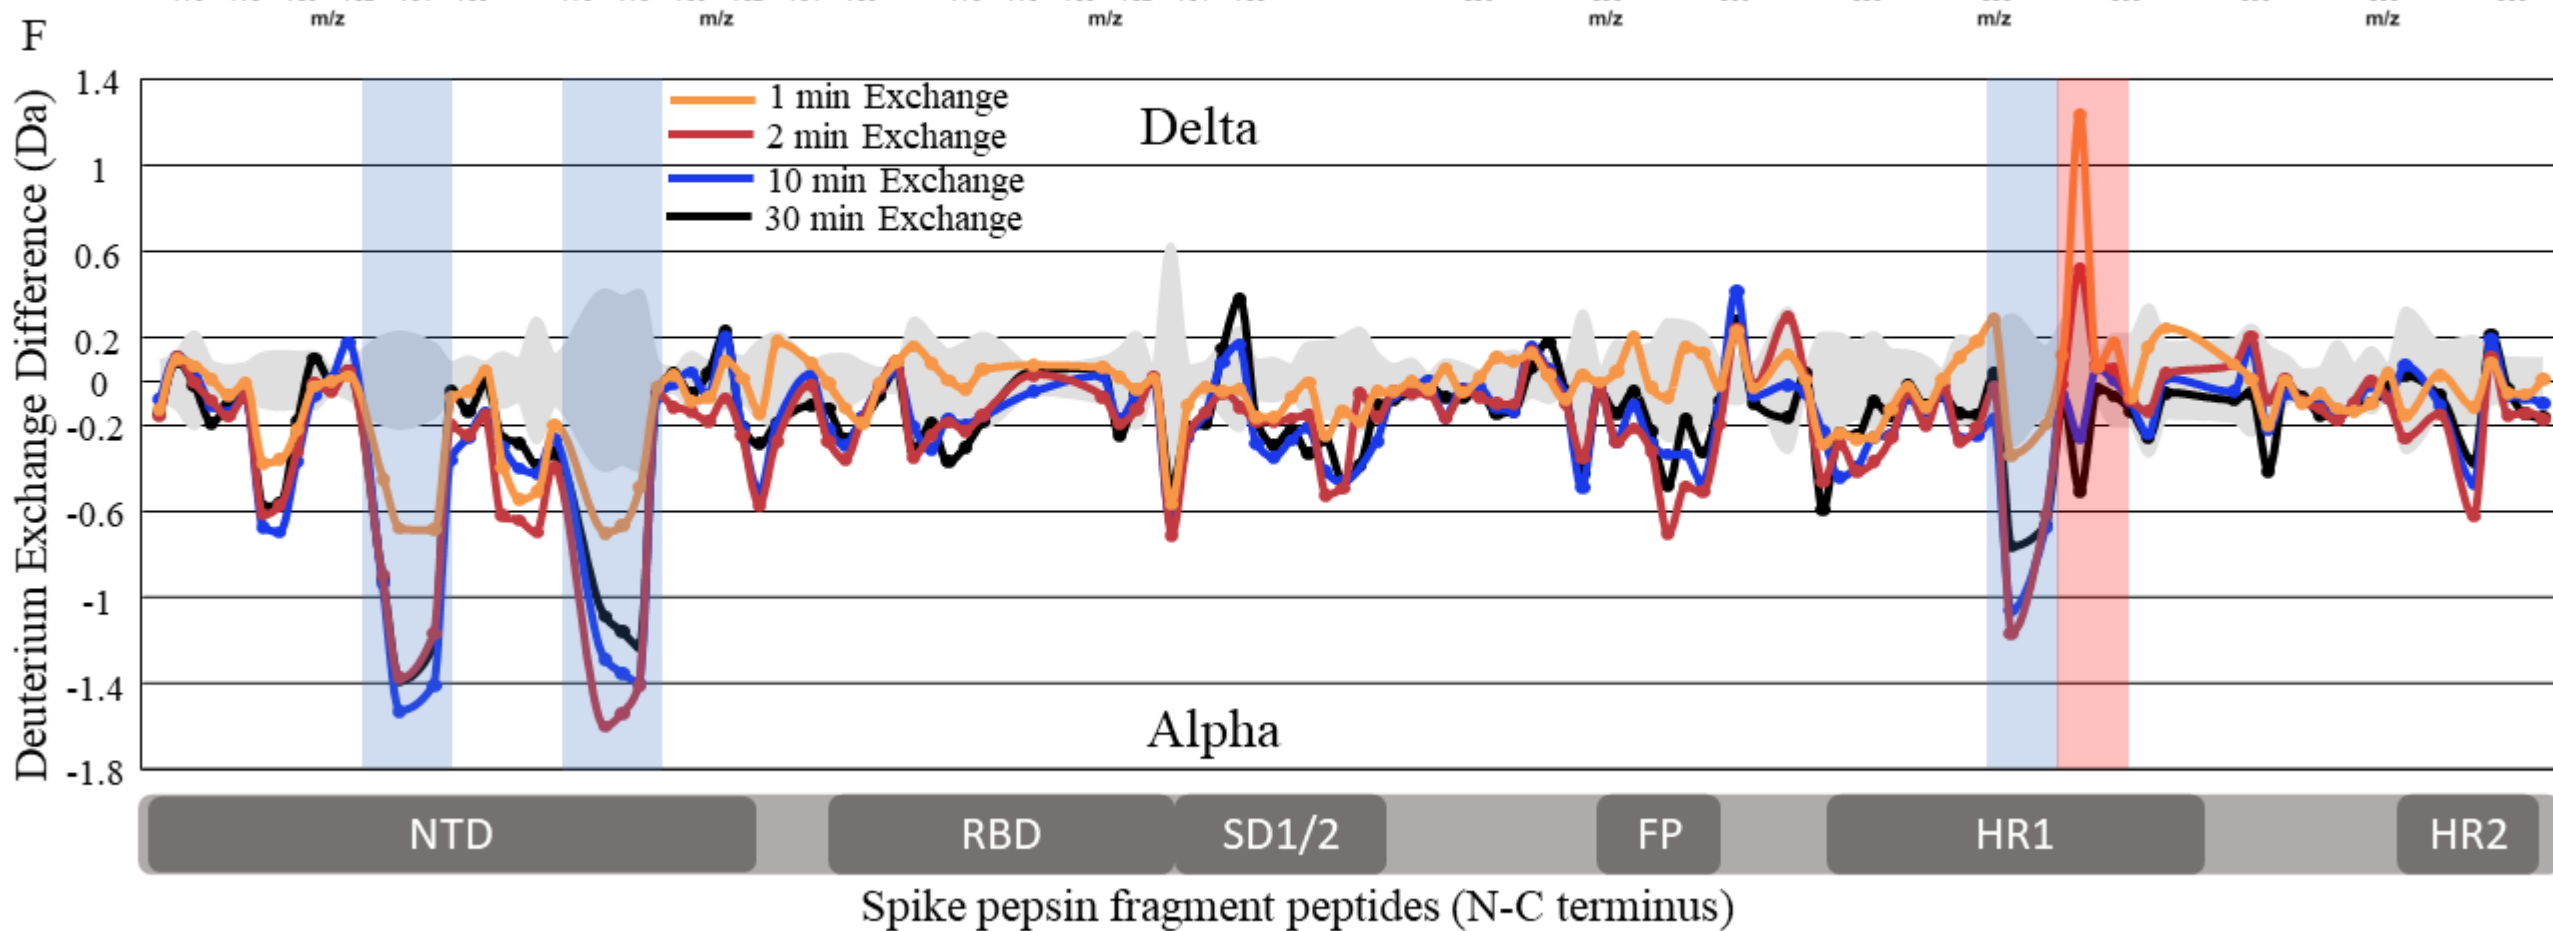



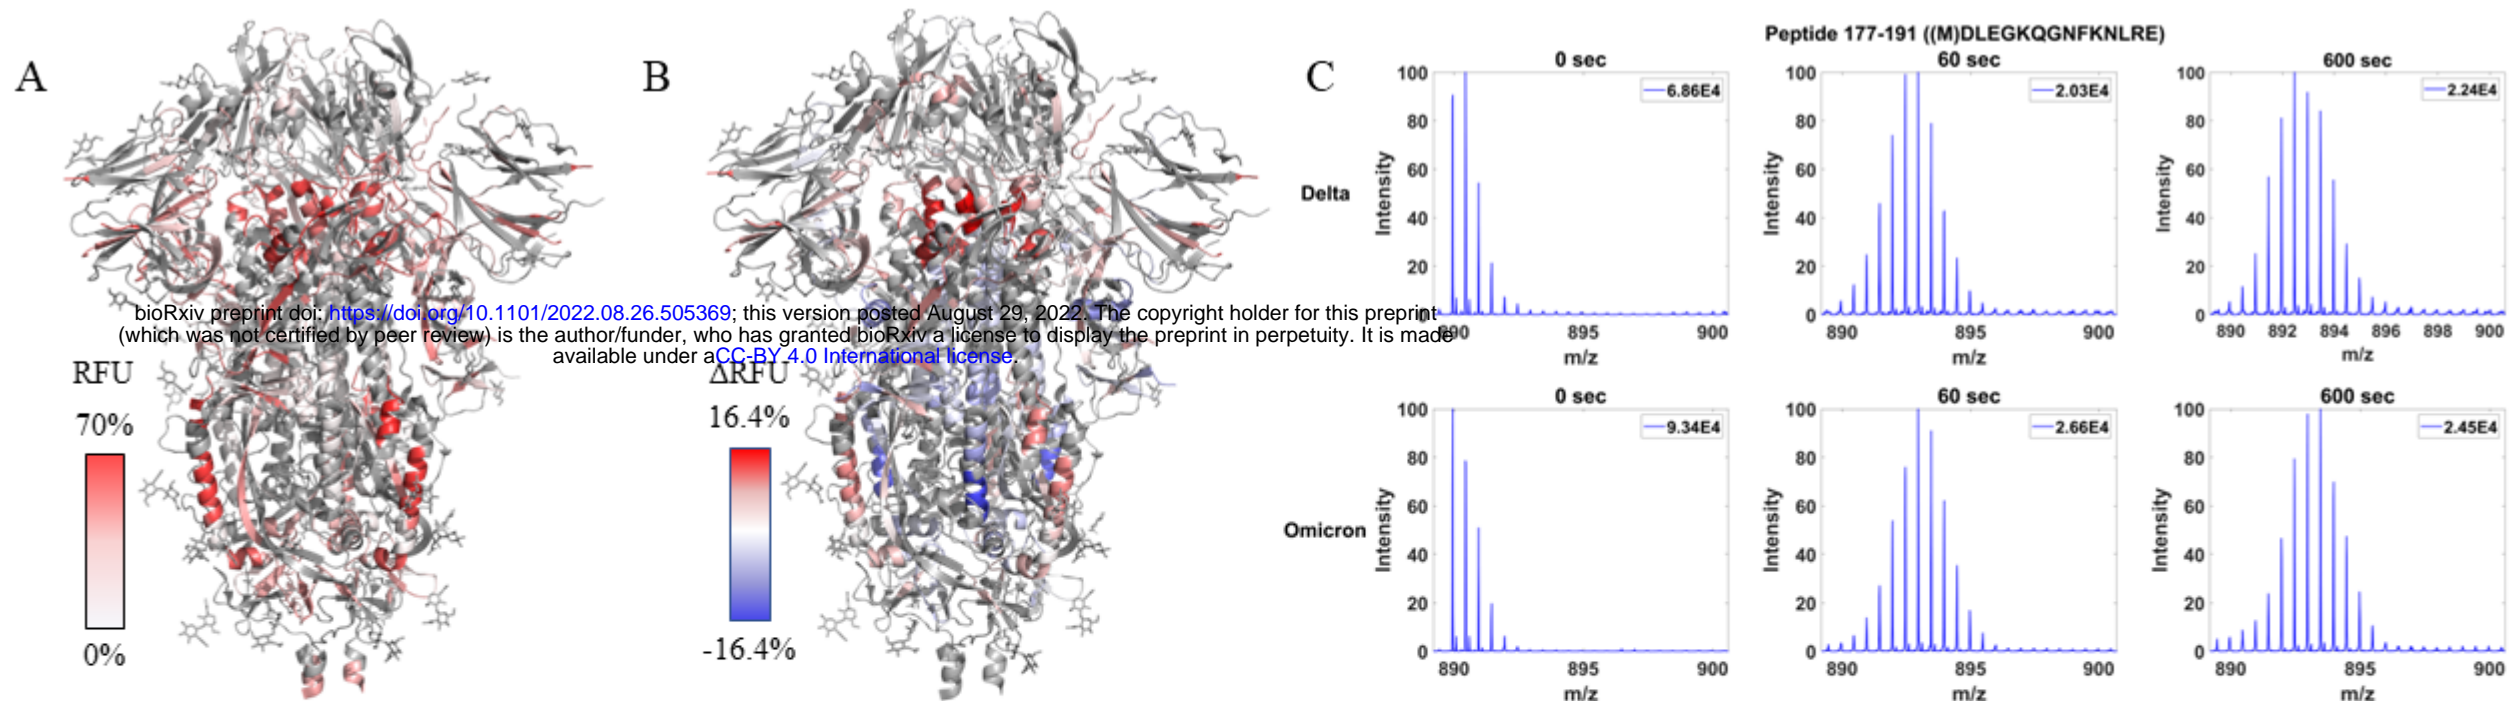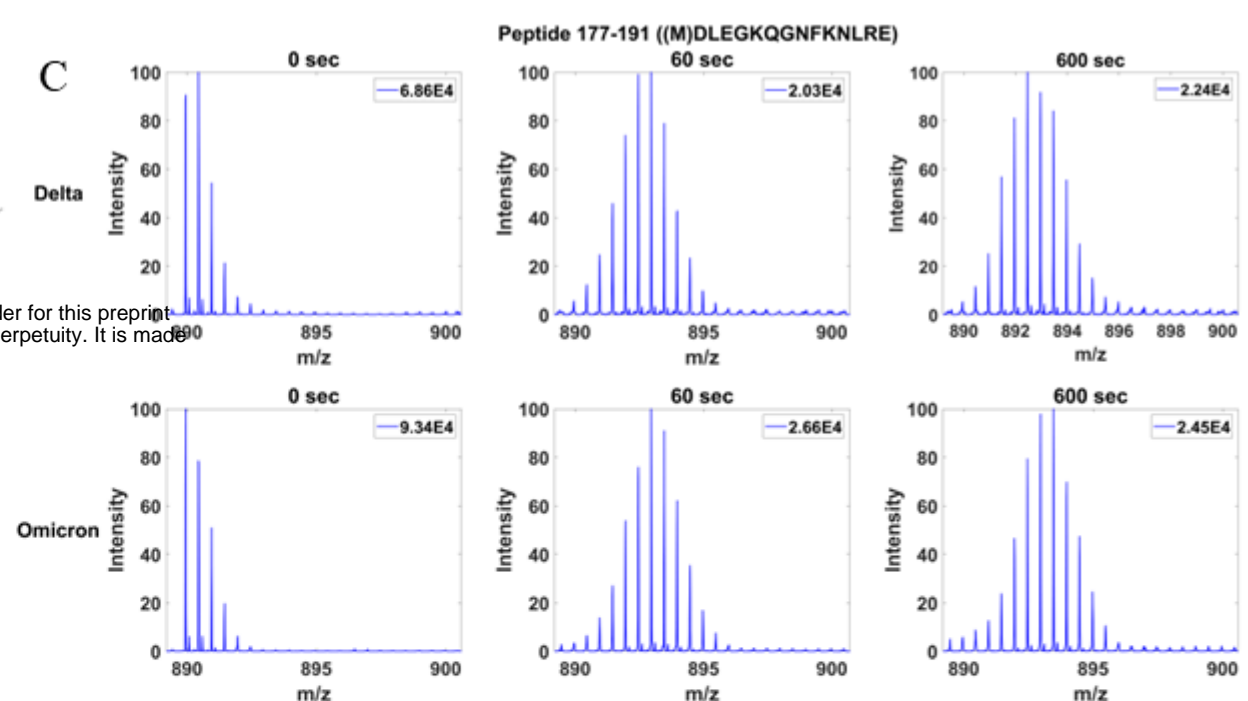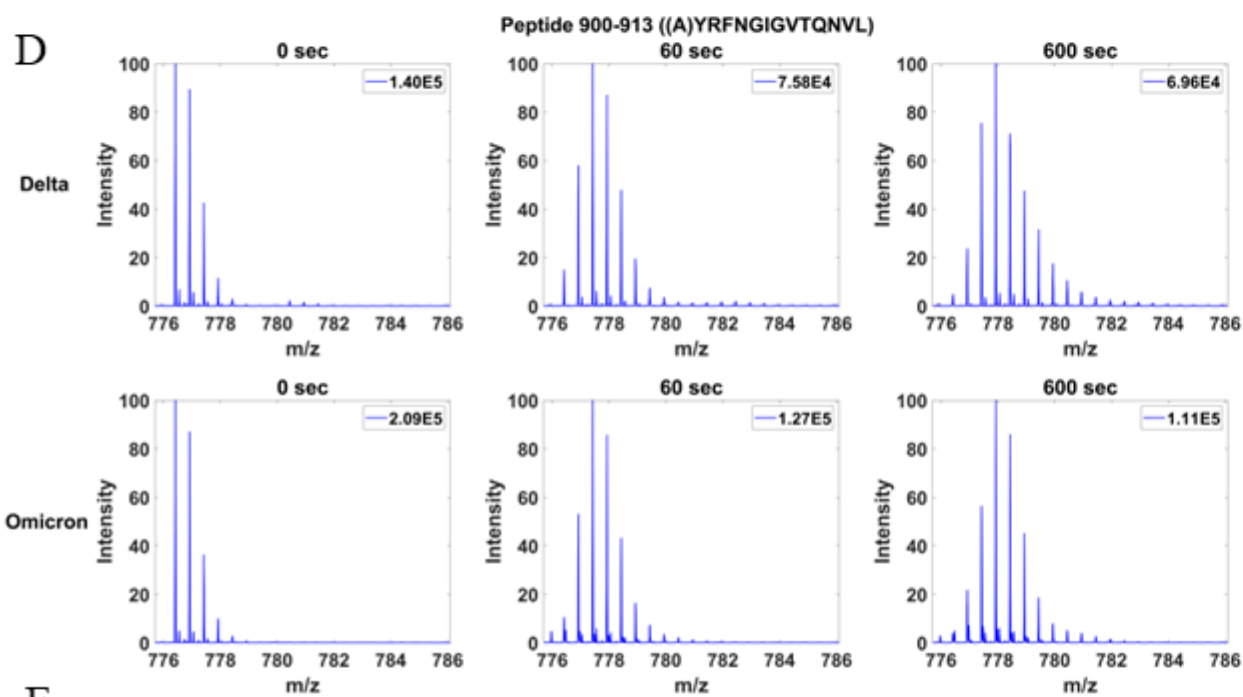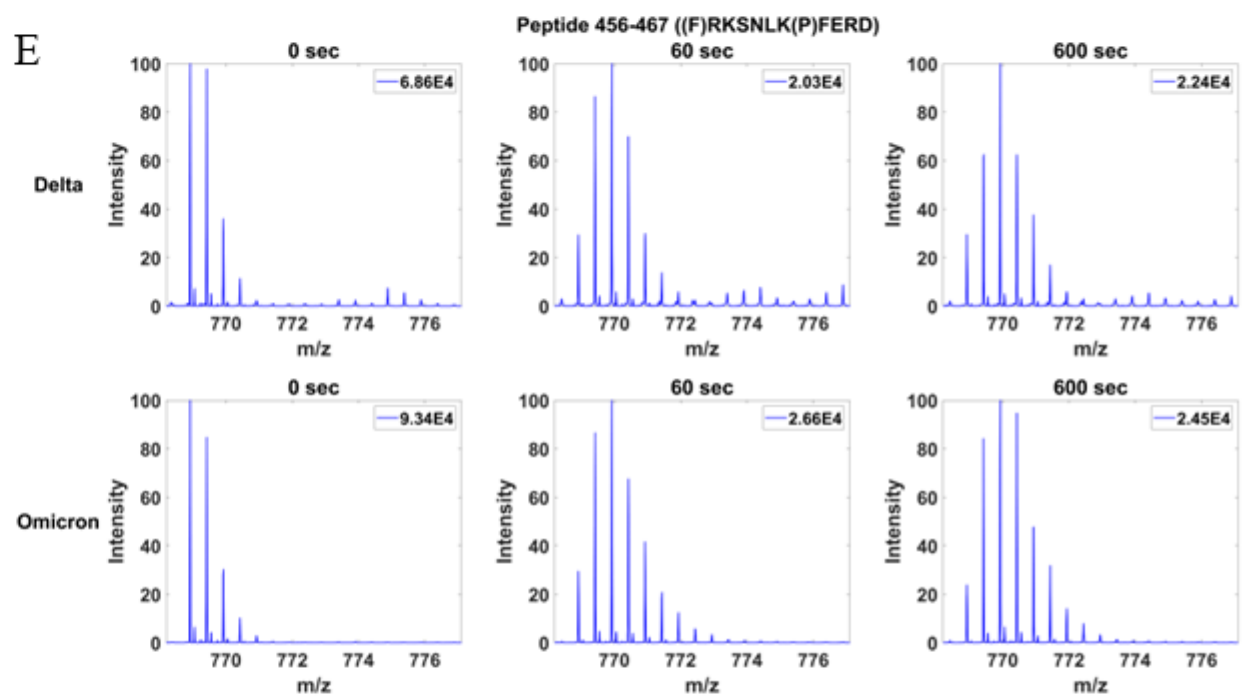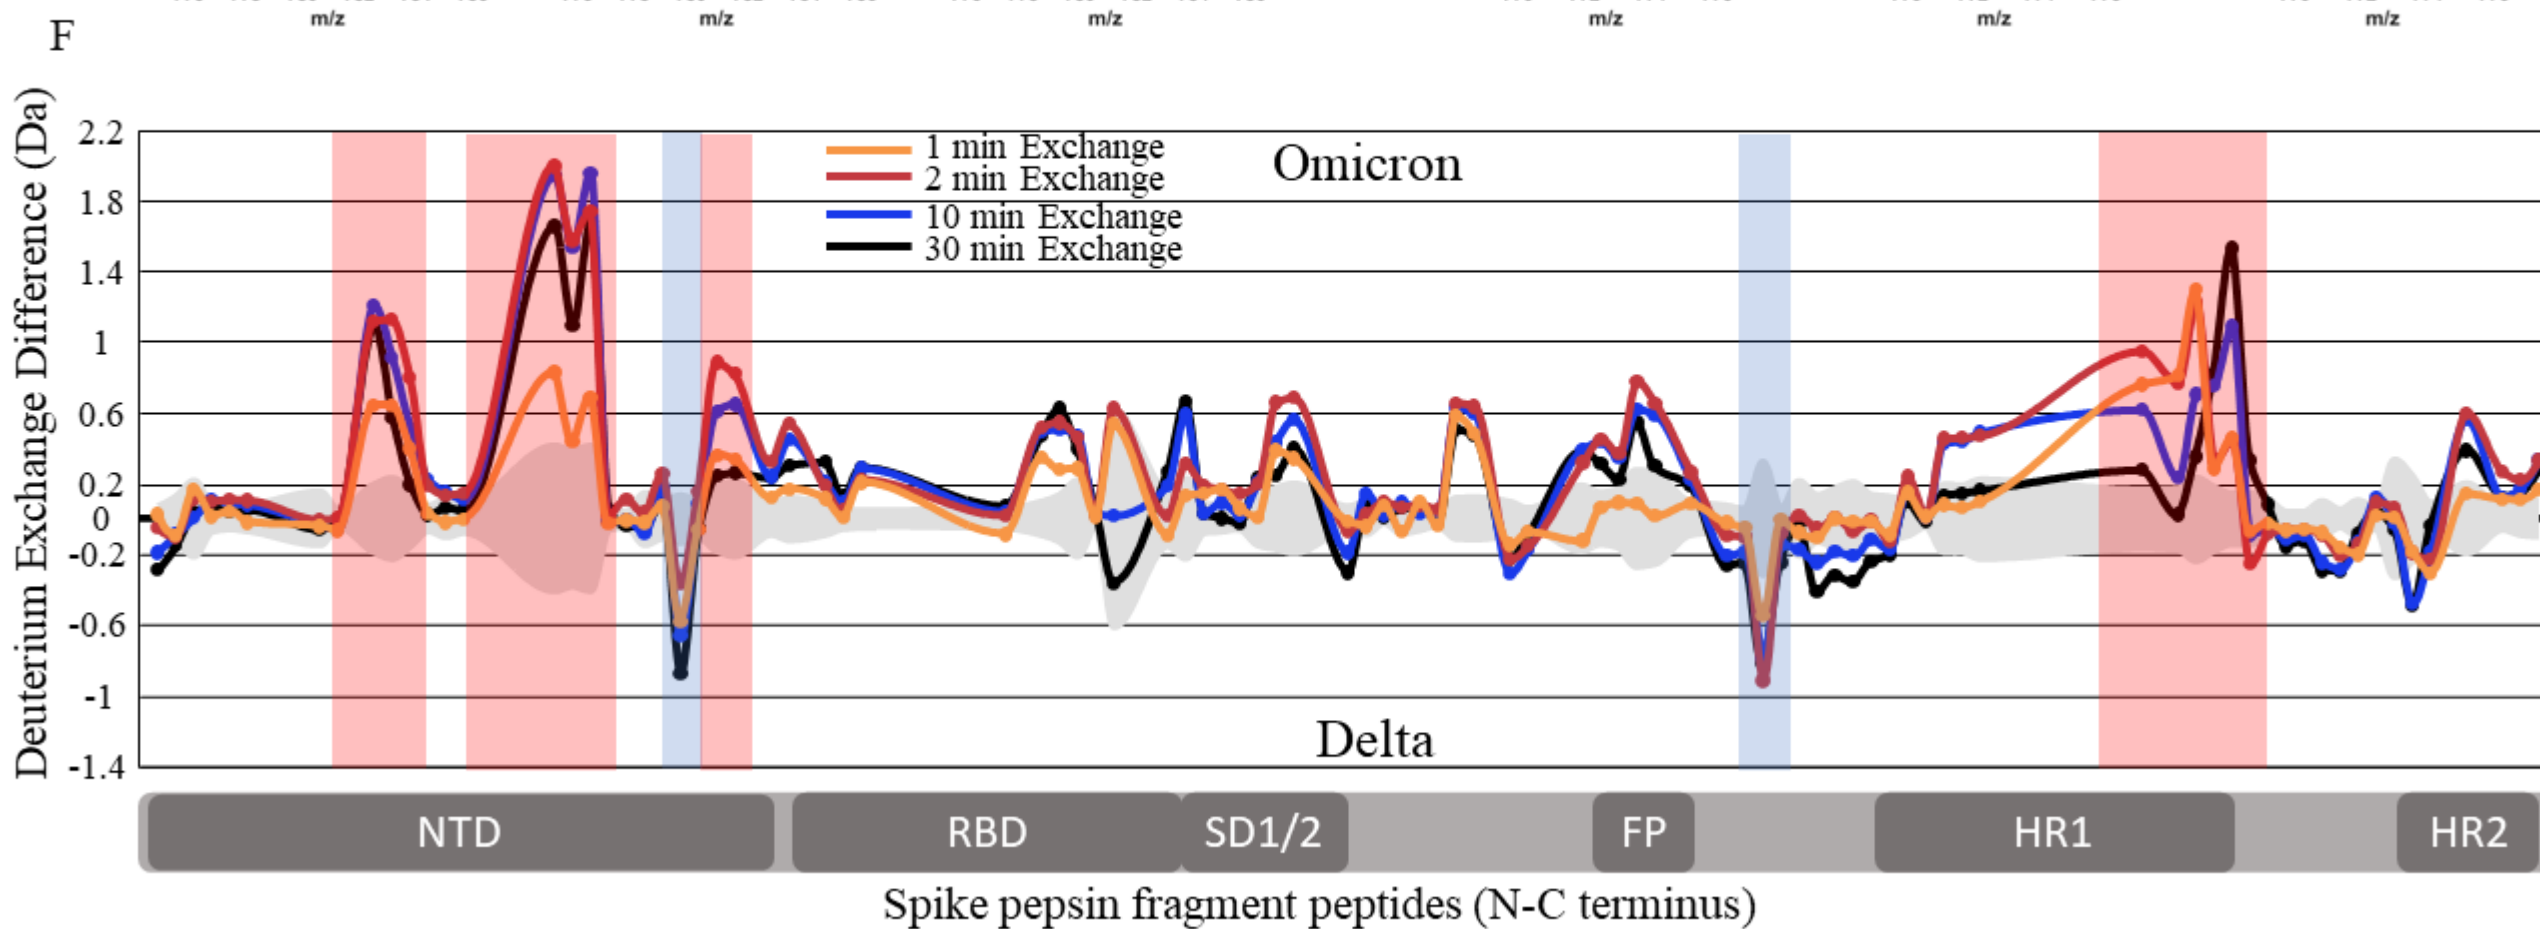

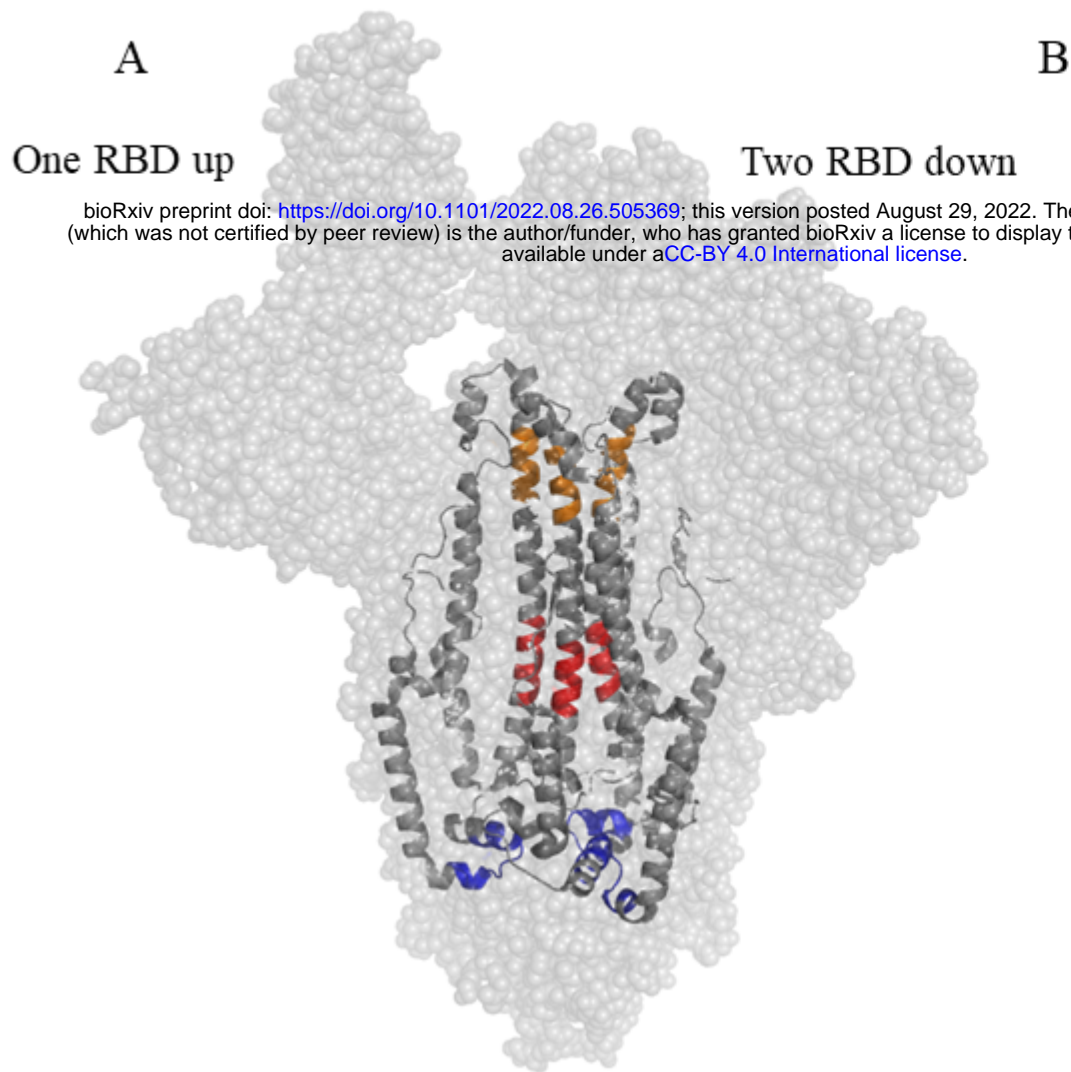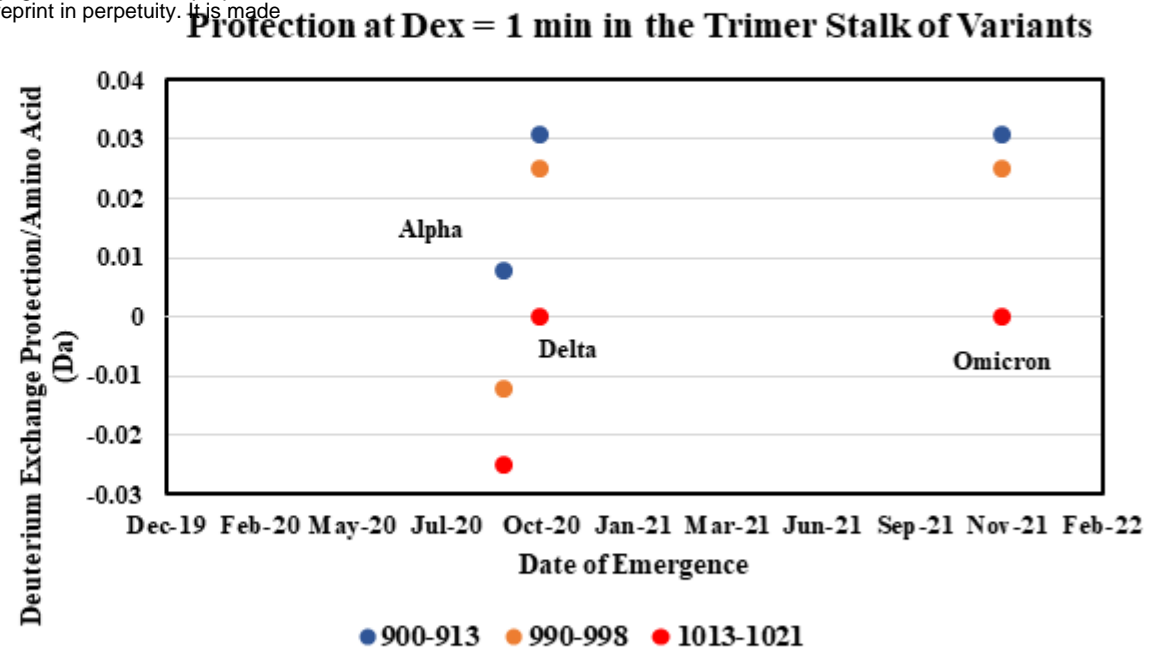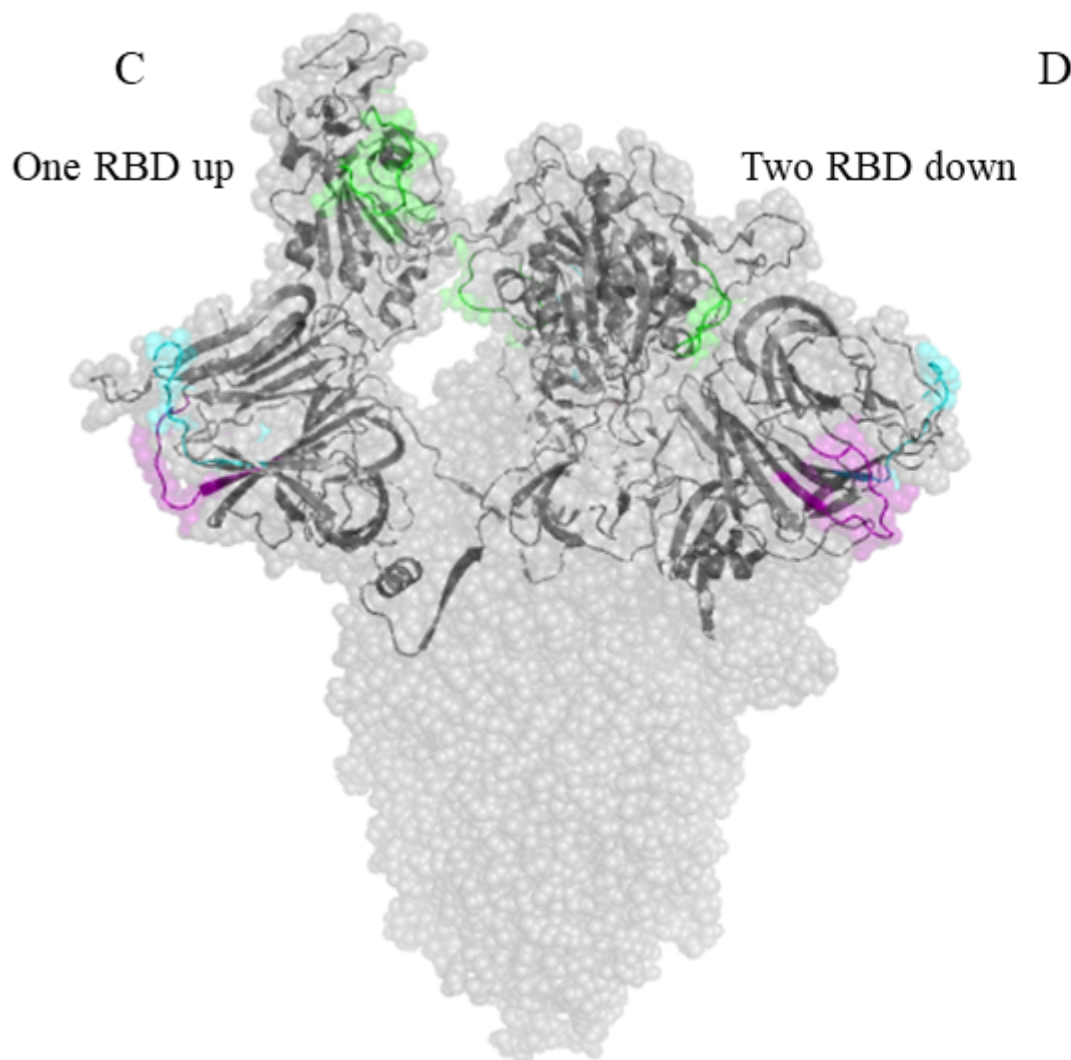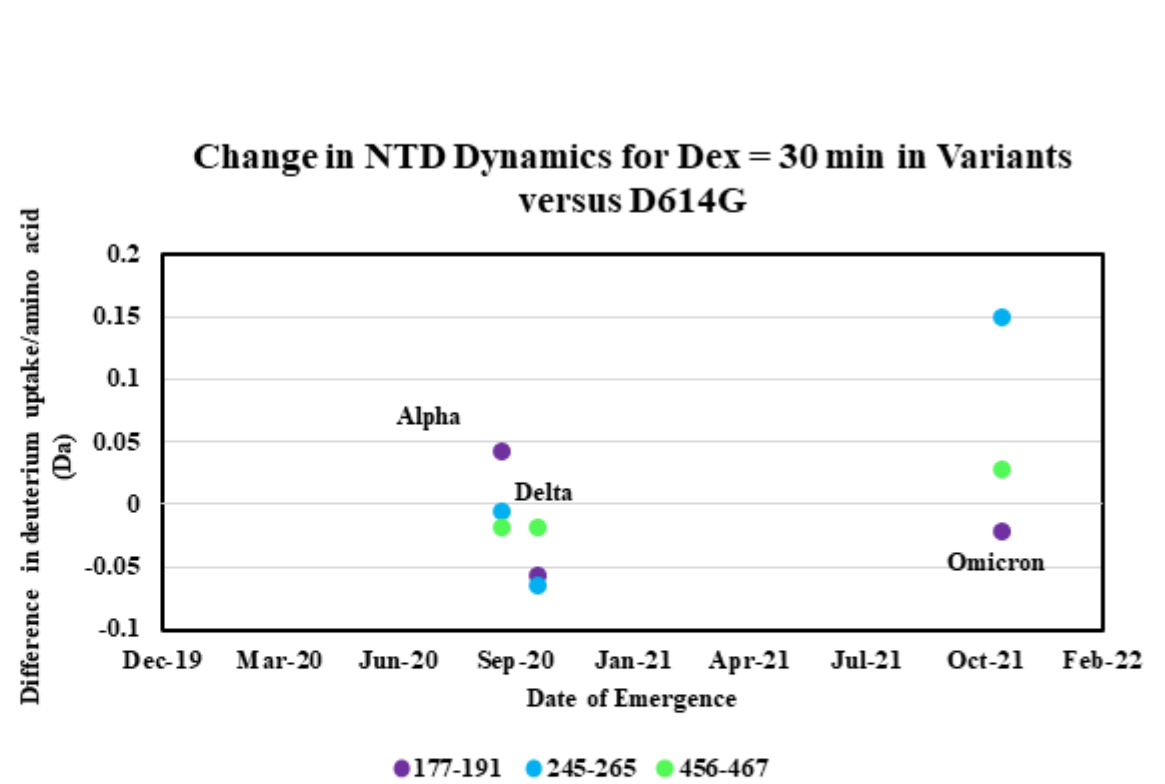

Source: https://www.biorxiv.org/content/10.1101/2022.08.26.505369v1.full.pdf
